# Supplementary material for: Loss of Ezh2 in the medial ganglionic eminence alters interneuron fate, cell morphology and gene expression profiles
Source: Frontiers journal article supplement (doi:10.3389/fncel.2024.1334244), 2024-02-14
Supplement: Presentation_1.pdf [file Presentation_1.pdf]

## Supplementary Figures & Legends

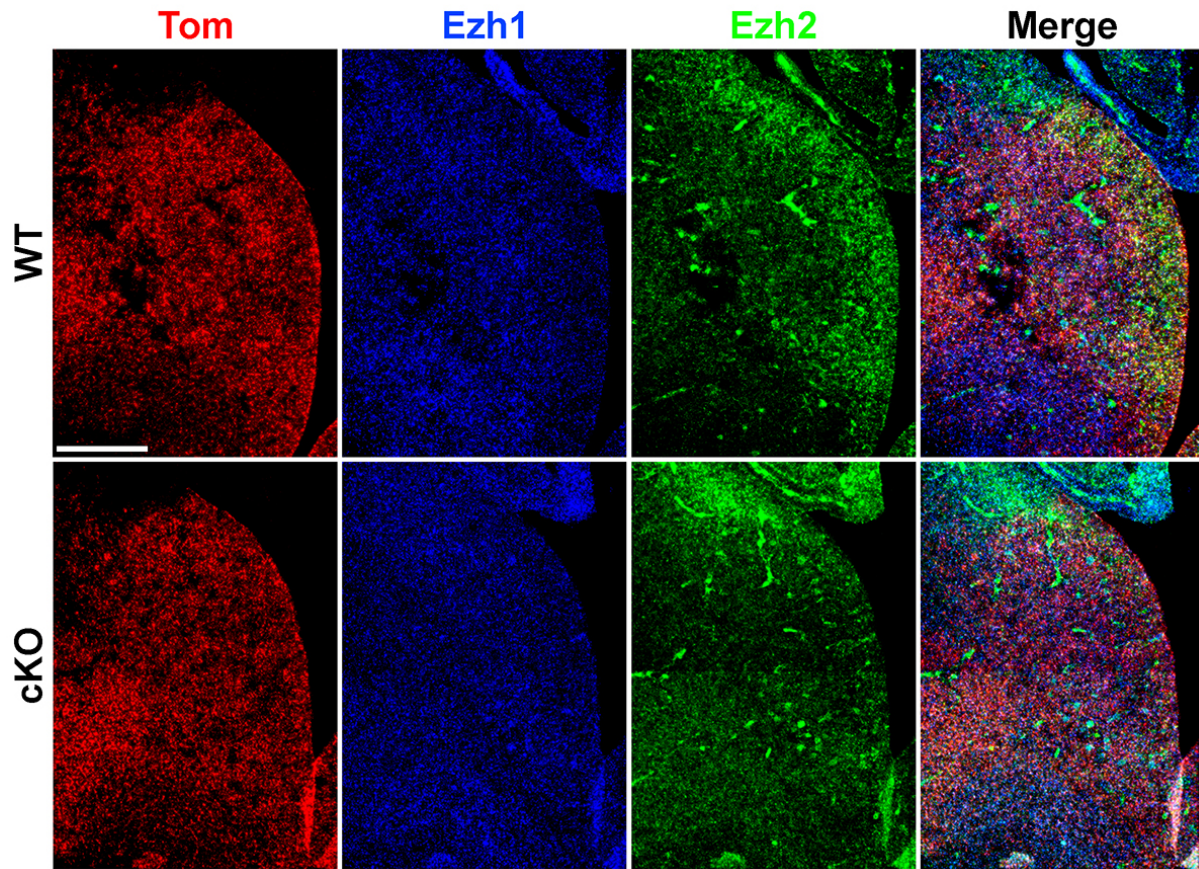

**Supplementary Figure 1. Ezh1 expression in the MGE of WT and *Ezh2* cKO mice.** *In situ* hybridizations depicting similar levels of Ezh1 mRNA in the MGE of *Ezh2* WT and cKO mice. Scale bar = 200  $\mu$ m.

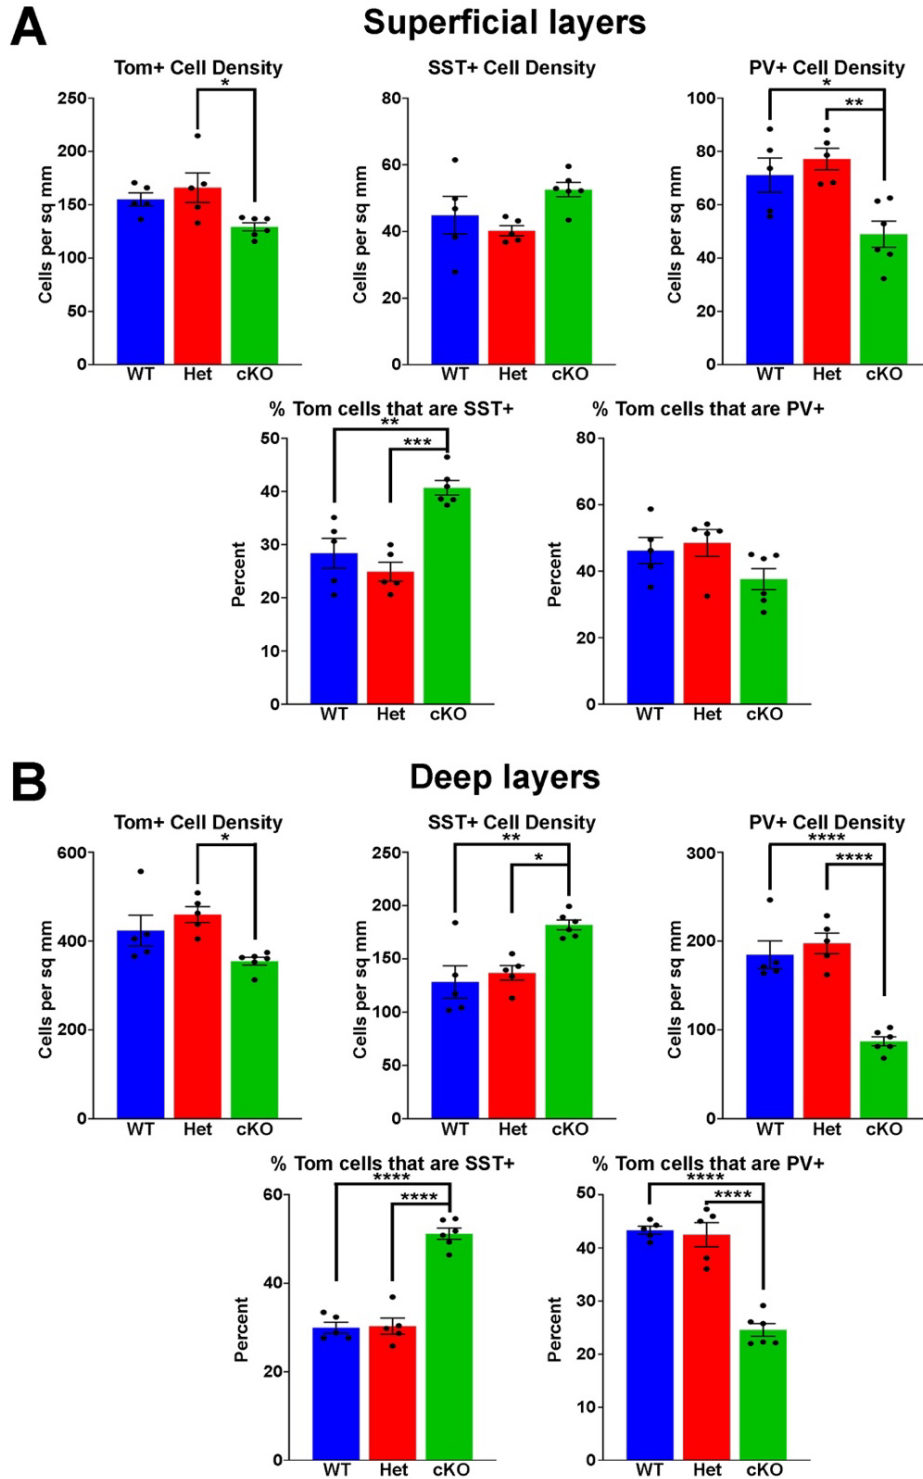

**Supplementary Figure 2. Comparison of SST+ and PV+ interneurons in superficial and deep cortical layers.** Graphs displaying the density of Tom+, SST+ and PV+ cells (top), and percent of Tom+ cells expressing SST or PV (bottom), for superficial (A) and deep (B) cortical layers. All stats are one-way ANOVA followed by Tukey's multiple comparison tests: \* =  $p \leq .05$ , \*\* =  $p \leq .005$ , \*\*\* =  $p \leq .0005$ , \*\*\*\* =  $p \leq .0001$ .  $n = 5$  WT, 5 Het and 6 cKO brains, from 4 different litters.

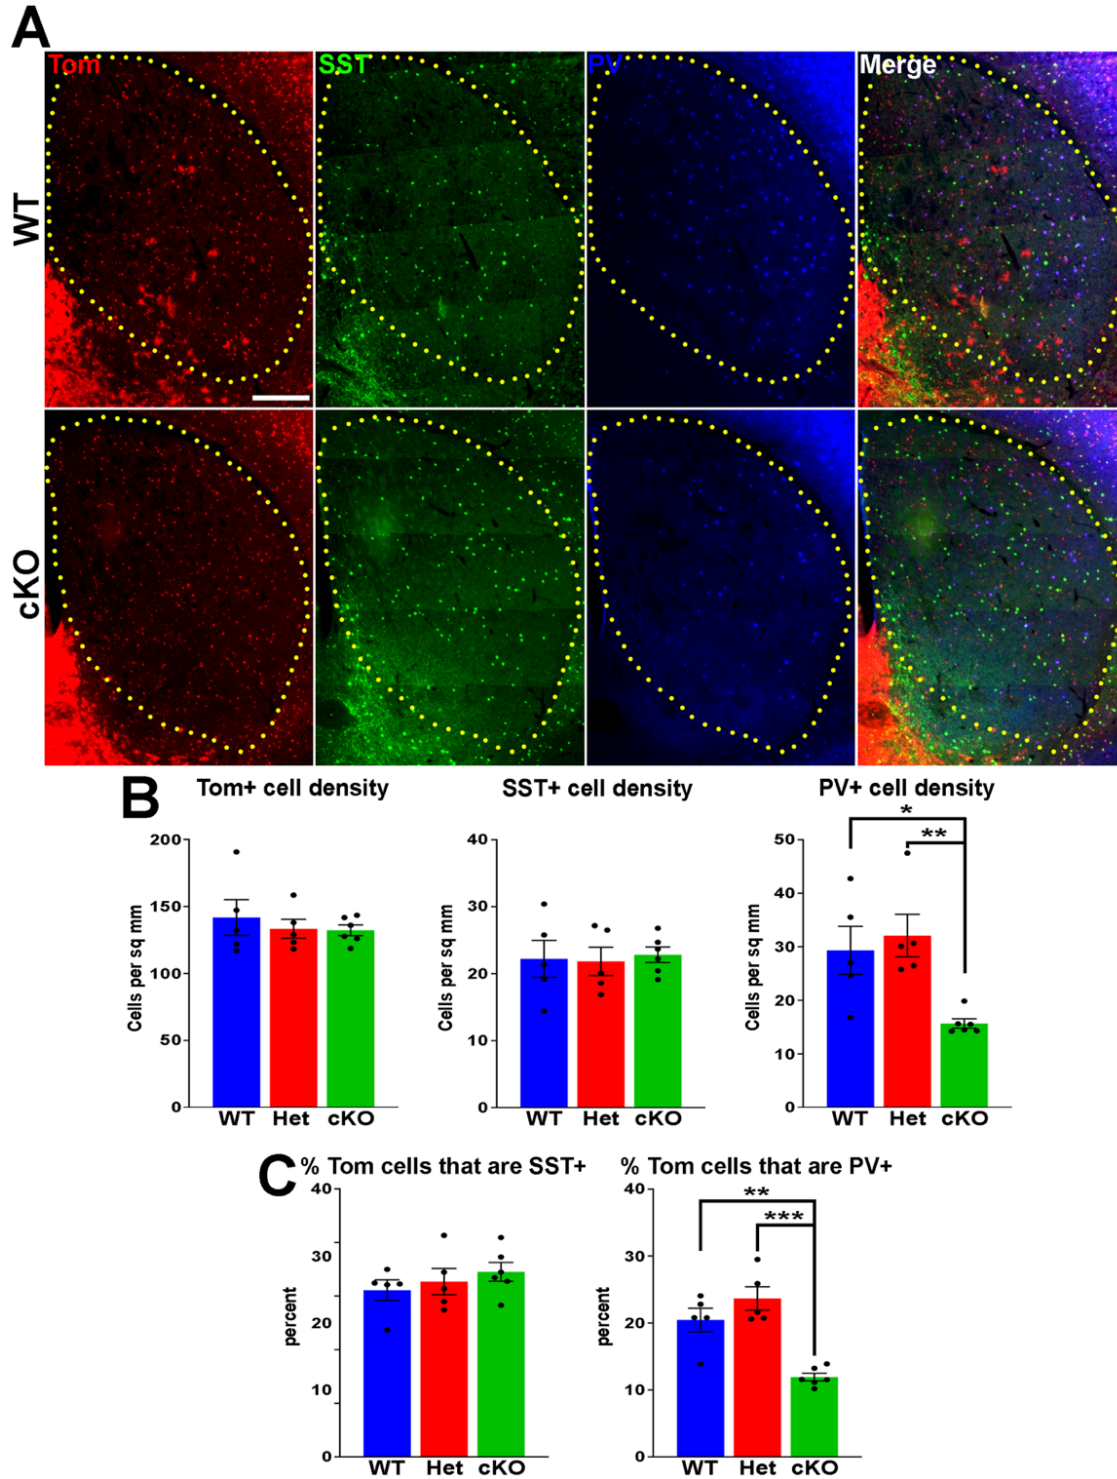

**Supplementary Figure 3. Changes in striatal interneuron fate in *Ezh2* cKO mice.** **A.** Representative images through the striatum of P30 *Nkx2-1-Cre;Ezh2;Ai9* WT and cKO mice stained for SST (green) and PV (blue). Scale bar = 500  $\mu$ m. **B-C.** Graphs displaying the density of Tom+, SST+ and PV+ cells (**B**) and the percent of Tom+ cells expressing SST or PV (**C**). All stats are one-way ANOVA followed by Tukey's multiple comparison tests: \* =  $p \leq .05$ , \*\* =  $p \leq .005$ , \*\*\* =  $p \leq .0005$ .  $n = 5$  WT, 5 Het and 6 cKO brains, from 4 different litters.

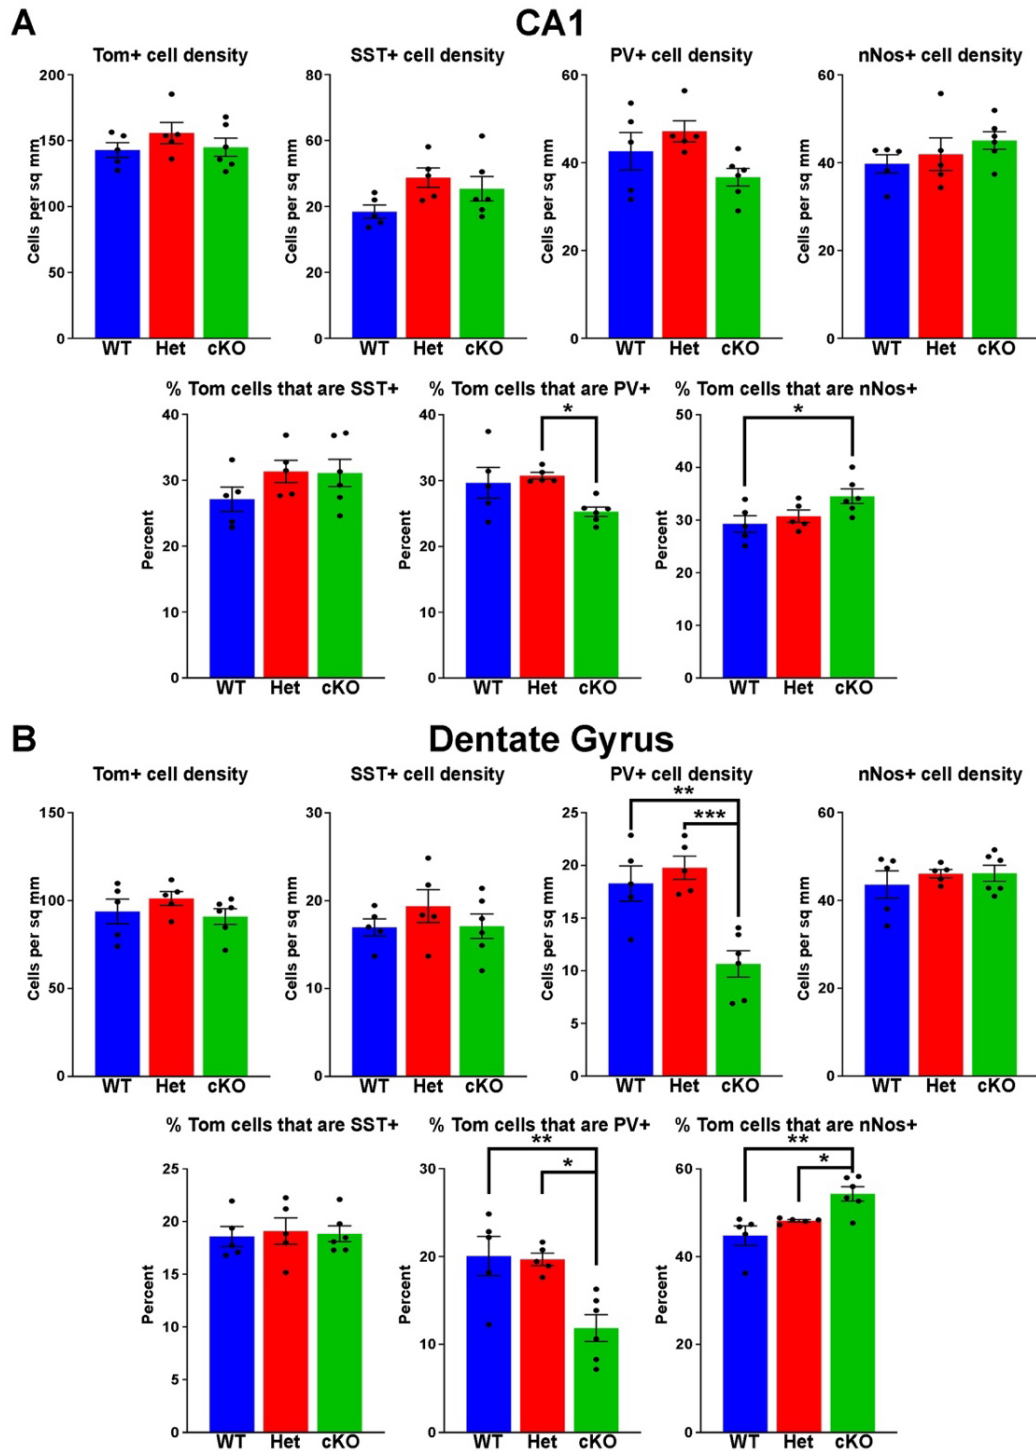

**Supplementary Figure 4. Cell fate changes in the CA1 and dentate gyrus of *Ezh2* cKO mice.**

**A.** Graphs displaying the density of Tom+, SST+, PV+ and nNos+ cells (top) and the percent of Tom+ cells expressing SST, PV or nNos (bottom) in the CA1 region of the hippocampus. **B.** Graphs displaying the density of Tom+, SST+, PV+ and nNos+ cells (top) and the percent of Tom+ cells expressing SST, PV or nNos (bottom) in the dentate gyrus region of the hippocampus. All stats are one-way ANOVA followed by Tukey's multiple comparison tests: \* =  $p \leq .05$ , \*\* =  $p \leq .005$ , \*\*\* =  $p \leq .0005$ .  $n = 5$  WT, 5 Het and 6 cKO brains, from 4 different litters.



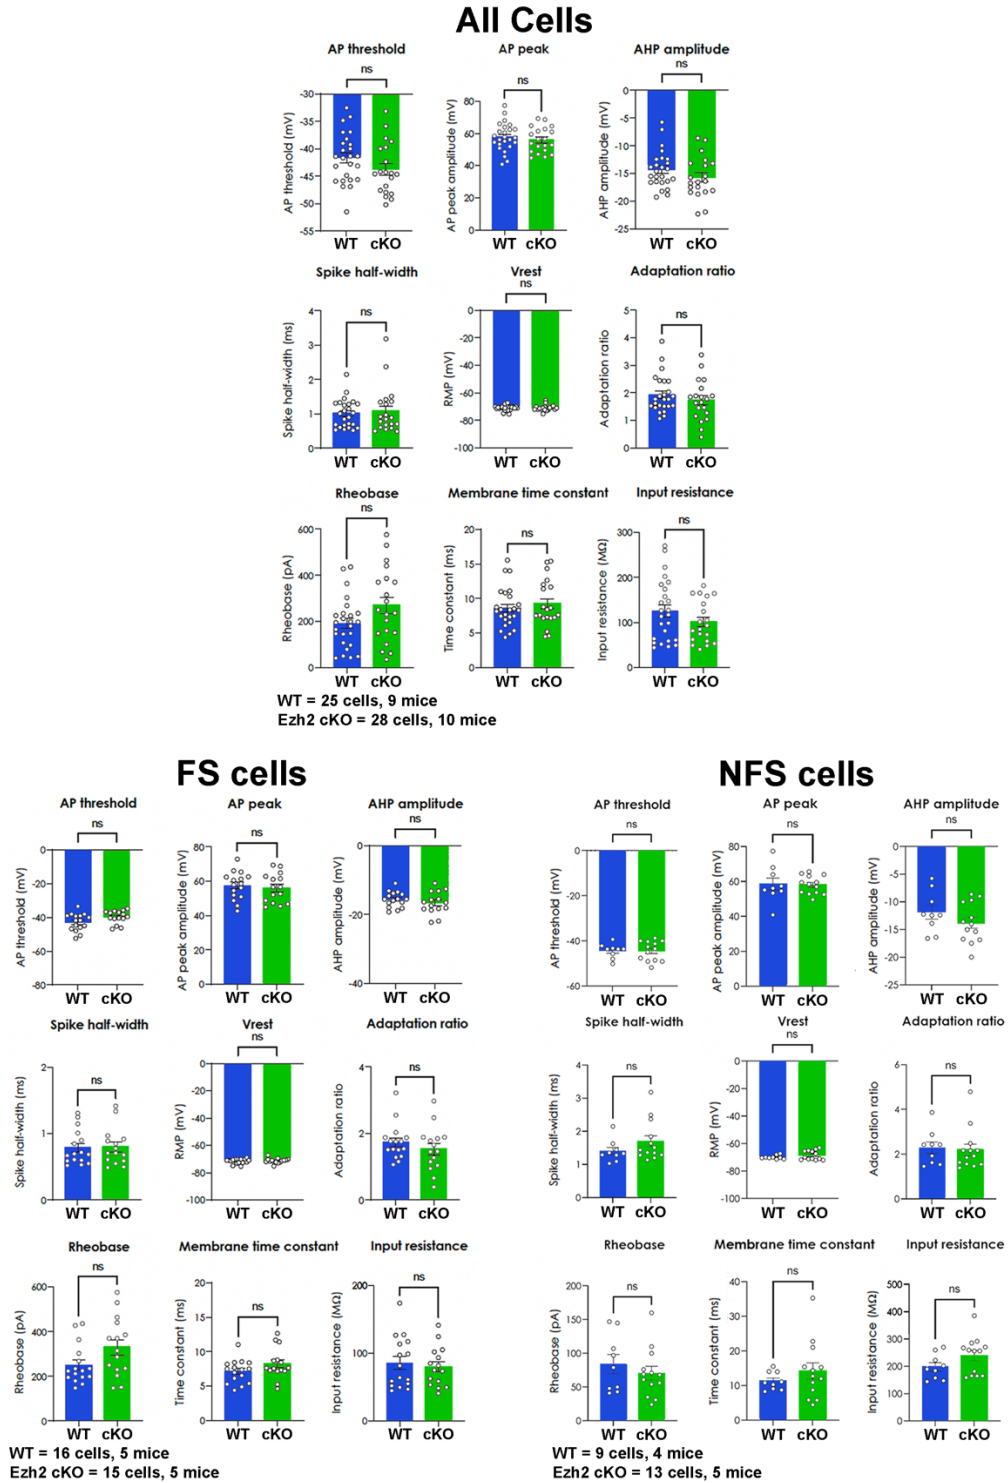

**Supplementary Figure 5. Intrinsic physiology properties of MGE-derived cortical interneurons in *Ezh2* cKO mice.** Graphs depict intrinsic properties of layer V/VI Tom+ cortical interneurons from P30-40 WT and cKO cells from fast-spiking (FS, lower left), non-fast-spiking (NFS, lower right) and combined FS and NFS cells (top). All statistics are Mann-Whitney test. WT = 16 FS cells from 5 mice and 9 NFS cells from 4 mice; cKO = 15 FS cells from 5 mice and 13 NFS cells from 5 mice.

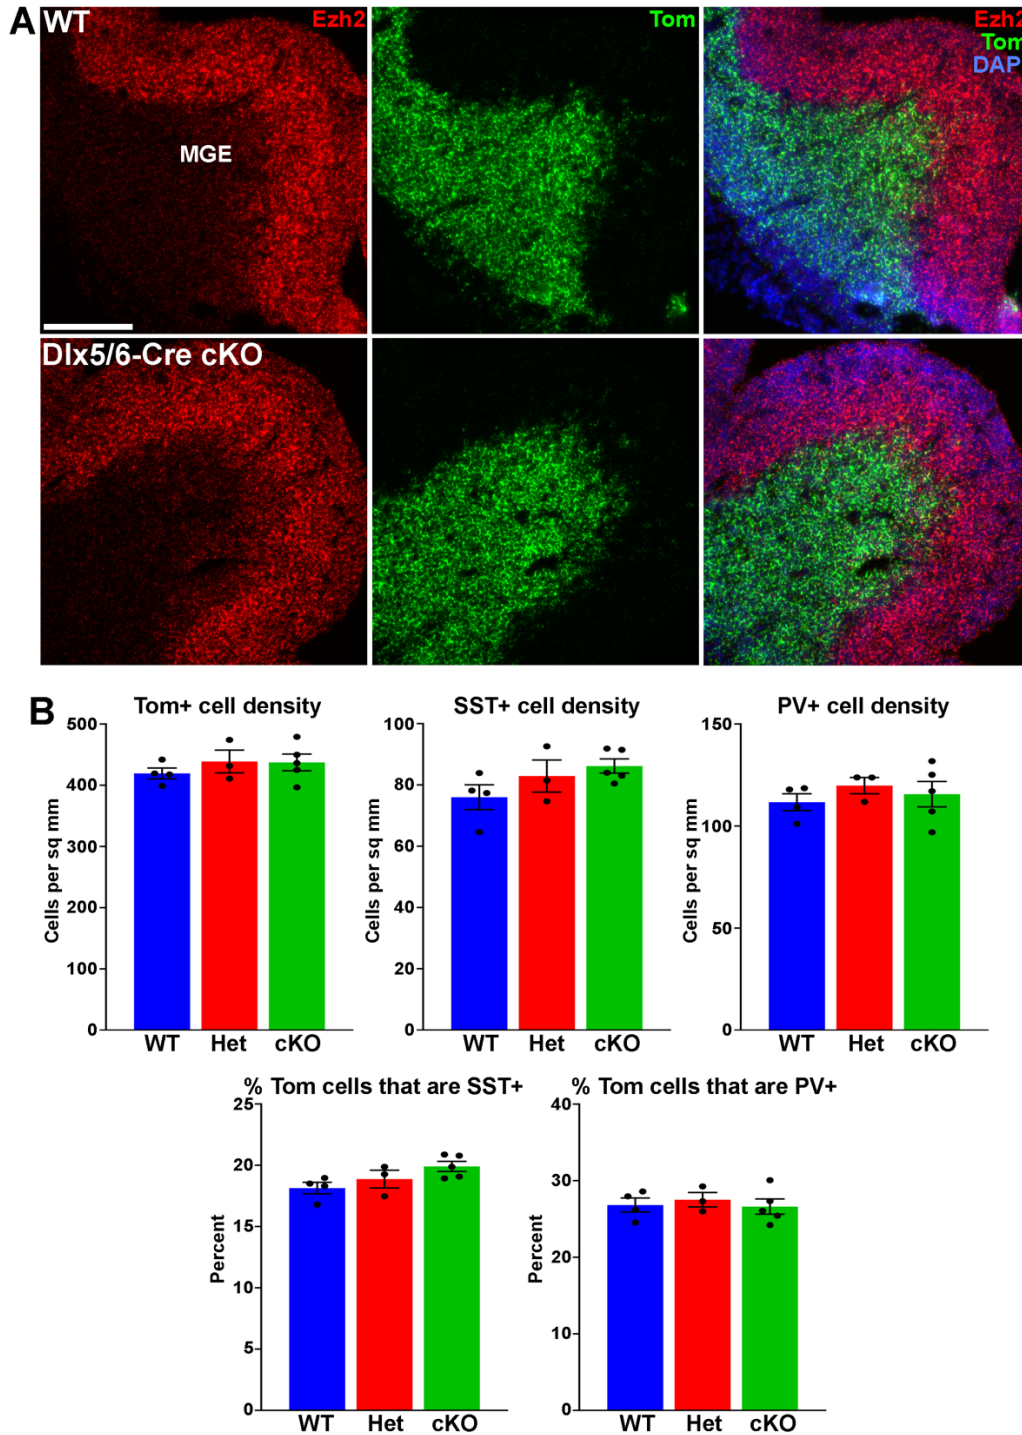

**Supplementary Figure 6. Normal interneuron densities and subtype distributions in the cortices of *Dlx5/6-Cre;Ezh2* cKO mice.** **A.** *In situ* hybridizations of *Ezh2* (red) and *tdTomato* (green) in the E12.5 MGE of *Dlx5/6-Cre;Ezh2;Ai9* WT and cKO mice. Scale bar = 200  $\mu$ m. **B.** Graphs displaying the density of Tom+, SST+ and PV+ cells (top) and the percent of Tom+ cells expressing SST or PV (bottom) in the cortex of WT, Het and *Dlx5/6-Cre* cKO mice. All stats are one-way ANOVA followed by Tukey's multiple comparison tests. n = 4 WT, 3 Het and 5 cKO brains, from 3 different litters.

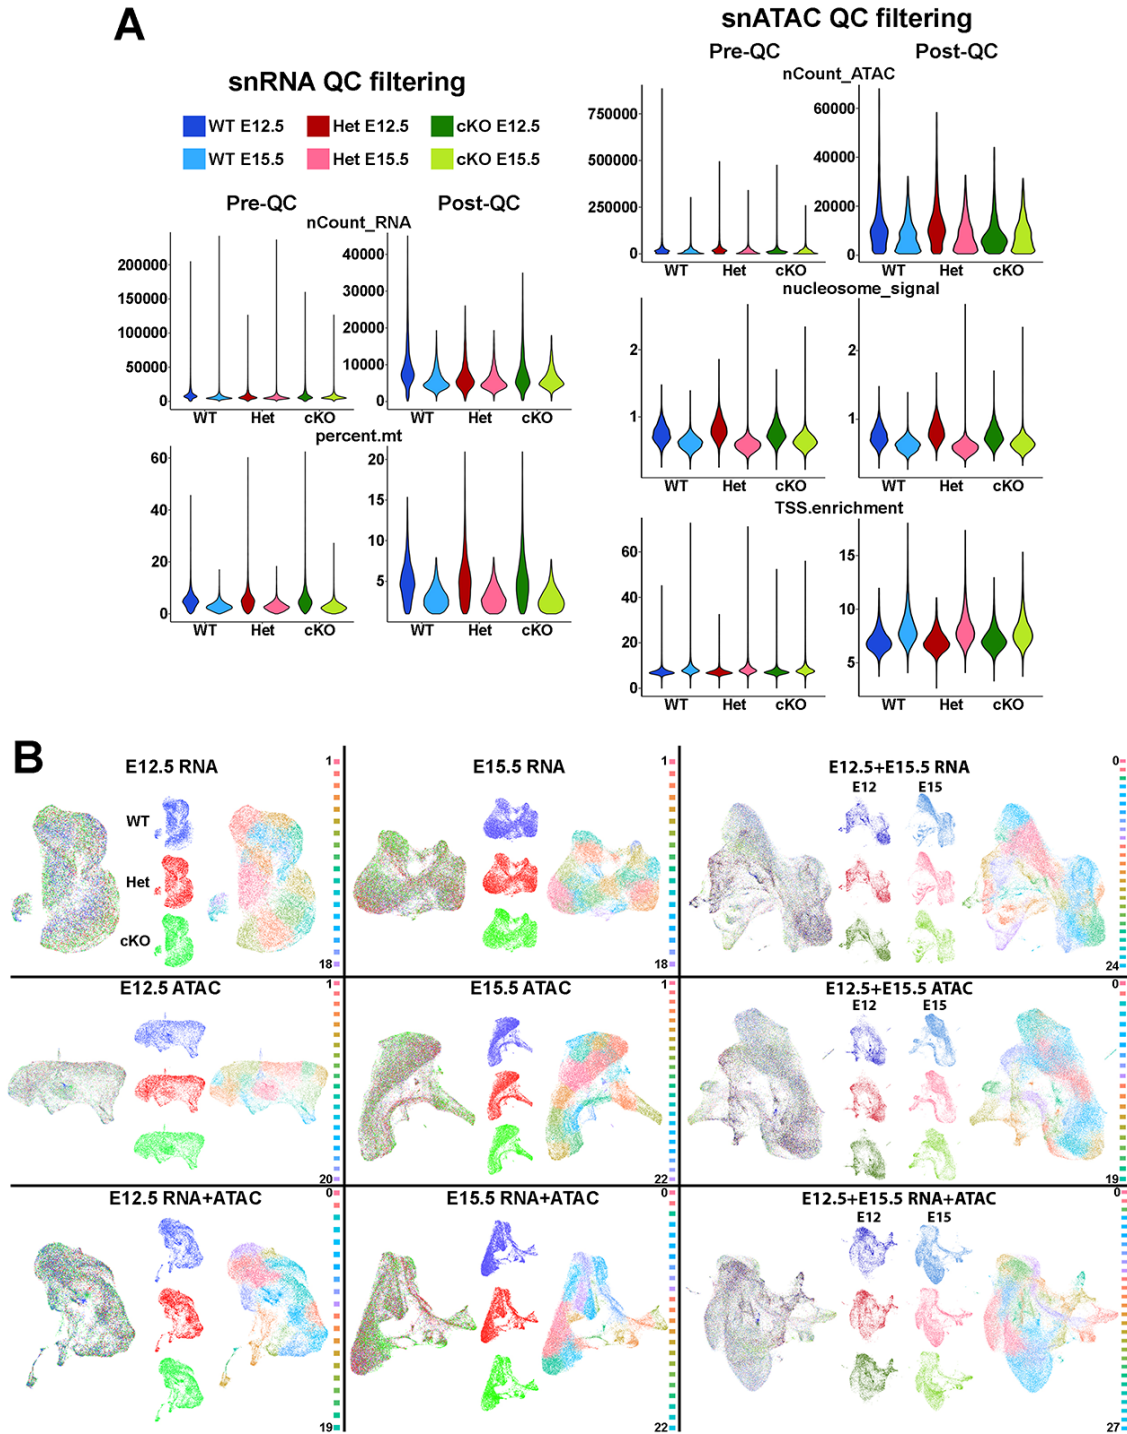

**Supplementary Figure 7. Single nuclei Multiome data from *Ezh2* WT and cKO mice. A.** Visualization of quality control (QC) metrics before (Pre-QC) and after (Post-QC) filtering of outliers. The number of RNA reads (nCount\_RNA), mitochondrial percentage (percent.mt), the number of ATAC fragments (nCount\_ATAC), nucleosome signal (nucleosome\_signal), and the TSS enrichment score (TSS.enrichment) are shown. **B.** UMAP plots of Multiome data separated by age (E12.5, E15.5 and combined) and modality (RNA, ATAC and integrated RNA+ATAC), with putative cell clusters. WT = blue, Het = red, cKO = green.

## Supplementary Table Legends

**Supplementary Table 1.** E12.5 Multiome data gene list showing average Log<sub>2</sub> fold change (avg\_log2FC) and false discovery rate (p\_val\_adj). Genes with a Log<sub>2</sub> fold change (FC) > ± 0.2 are shaded blue, genes with a false discovery rate (FDR) of -Log<sub>10</sub>AdjustedP < 10<sup>-6</sup> are shaded yellow, and genes in both groups are in red text.

**Supplementary Table 2.** E15.5 Multiome data gene list showing average Log<sub>2</sub> fold change (avg\_log2FC) and false discovery rate (p\_val\_adj). Genes with a Log<sub>2</sub> fold change (FC) > ± 0.2 are shaded blue, genes with a false discovery rate (FDR) of -Log<sub>10</sub>AdjustedP < 10<sup>-6</sup> are shaded yellow, and genes in both groups are in red text.

**Supplementary Table 3.** E12.5 CUT&Tag data detailing all called peaks. Peaks with a false discovery rate (FDR) < 0.1 are shaded green.

**Supplementary Table 4.** E15.5 CUT&Tag data detailing all called peaks. Peaks with a false discovery rate (FDR) < 0.1 are shaded green.

**Supplementary Table 5.** Sequencing depth for all 12 CUT&Tag samples used in this study.

**Supplementary Table 6.** Sequencing information about RNA and ATAC runs for all 6 Multiome samples used in this study.

**Data Sheet 1.** Excel spreadsheet containing all cell counts and statistics used in this study.



### **Data Repository Information**

All sequencing data (raw and processed files) generated in this study has been deposited in the Gene Expression Omnibus (GEO) database with the following accession numbers: [GSE233190](#) (CUT&Tag dataset), [GSE233153](#) (single nuclei Multiome dataset, which includes the snRNA/GEX [GSE233151](#) and the snATAC [GSE233152](#) data). No custom code was used in the manuscript, and all computational pipelines are described in the methods. Please contact the corresponding author for more information if needed.
