# Supplementary material for: Loss of Ezh2 in the medial ganglionic eminence alters interneuron fate, cell morphology and gene expression profiles
Source: Front Cell Neurosci. 2024 Feb 14;18:1334244. doi: 10.3389/fncel.2024.1334244 (PMC10899338; doi:10.3389/fncel.2024.1334244)
Supplement: Supplementary file 2 [file Data_Sheet_1.xlsx]

## Sheet: All Cell Counts
	ALL CELL COUNTS USED IN STUDY (PERFORMED BLIND TO GENOTYPE)
	P30 Nkx2.1-Cre;Ezh2;Ai9 (WT = 5, Het = 5, KO = 6)
	WHOLE CORTEX
		CtxT-Tom-WT-Dens	CtxT-Tom-HET-Dens	CtxT-Tom-KO-Dens	CtxT-SST-WT-Dens	CtxT-SST-HET-Dens	CtxT-SST-KO-Dens	CtxT-PV-WT-Dens	CtxT-PV-HET-Dens	CtxT-PV-KO-Dens	CtxT-SST-WT-%	CtxT-SST-HET-%	CtxT-SST-KO-%	CtxT-PV-WT-%	CtxT-PV-HET-%	CtxT-PV-KO-%
	1	353.97	314.2	214.17	116.91	85.51	106.28	167.39	148.28	50.2	32.43	25.84	45.86	51.51	48.65	24.96
	2	277.96	338.92	249.29	81.96	96.99	118.51	122.35	135.74	77.31	29.71	26.59	44.66	45.96	44.08	35.28
	3	293	285.36	244.84	98.12	74.99	115.12	128.08	134.15	82.03	34.28	27	43.96	43.63	48.8	37.1
	4	270.96	276.26	242.43	71.22	91.94	120.63	110.75	120.36	67.06	25.45	33.44	47.05	39.38	46.14	32.96
	5	251.05	349.61	251.09	64.83	93.09	127.23	110.92	148.15	62.21	24.1	25.19	47.76	43.39	39.9	26.61
	6			249.92			115.43			69.2			46.44			29.69
	Average	289.388	312.87	241.957	86.608	88.504	117.2	127.898	137.336	68.0017	29.194	27.612	45.955	44.774	45.514	31.1
	Std Error	17.4984	14.3654	5.71911	9.44302	3.84995	2.83306	10.4229	5.18457	4.60509	1.95668	1.48981	0.587604	1.98871	1.65223	1.97298
	SUPERFICIAL CORTEX
		CtxS-Tom-WT-Dens	CtxS-Tom-HET-Dens	CtxS-Tom-KO-Dens	CtxS-SST-WT-Dens	CtxS-SST-HET-Dens	CtxS-SST-KO-Dens	CtxS-PV-WT-Dens	CtxS-PV-HET-Dens	CtxS-PV-KO-Dens	CtxS-SST-WT-%	CtxS-SST-HET-%	CtxS-SST-KO-%	CtxS-PV-WT-%	CtxS-PV-HET-%	CtxS-PV-KO-%
	1	151.2	165.66	115.73	49.88	37.41	43.44	88.37	83.16	32.29	32.48	22.99	37.43	58.72	51.33	27.64
	2	150.93	169.45	138.04	46.82	39.2	52.11	73.62	88.03	62.51	30.63	22.77	38.47	49.54	52.1	44.8
	3	170.62	132.87	136.86	61.48	36.84	52.88	80.42	68.3	61.38	35.12	28.17	38.6	46.23	52.58	45.06
	4	165.92	147.73	121.98	38.33	44.47	52.2	57.63	78.57	52.84	23.23	29.99	42.28	35.2	54.18	43.79
	5	136.38	214.6	136.82	27.9	43.16	55.22	55.56	67.73	43.11	20.52	20.59	40.94	41.41	32.5	31.22
	6			125.78			59.52			41.43			46.48			33.31
	Average	155.01	166.062	129.202	44.882	40.216	52.5617	71.12	77.158	48.9267	28.396	24.902	40.7	46.22	48.538	37.6367
	Std Error	6.08662	13.7937	3.83037	5.63714	1.53406	2.15349	6.38121	4.02225	4.90482	2.78927	1.77992	1.36673	3.94873	4.03652	3.18386
	DEEP CORTEX
		CtxD-Tom-WT-Dens	CtxD-Tom-HET-Dens	CtxD-Tom-KO-Dens	CtxD-SST-WT-Dens	CtxD-SST-HET-Dens	CtxD-SST-KO-Dens	CtxD-PV-WT-Dens	CtxD-PV-HET-Dens	CtxD-PV-KO-Dens	CtxD-SST-WT-%	CtxD-SST-HET-%	CtxD-SST-KO-%	CtxD-PV-WT-%	CtxD-PV-HET-%	CtxD-PV-KO-%
	1	556.74	462.73	312.61	183.95	133.62	169.13	246.41	213.4	68.12	32.38	28.68	54.3	44.29	45.97	22.28
	2	405	508.39	360.55	117.09	154.78	184.9	171.08	183.45	92.11	28.8	30.42	50.85	42.38	36.05	25.75
	3	415.39	437.86	352.81	134.77	113.15	177.36	175.75	200.01	102.67	33.45	25.82	49.31	41.02	45.03	29.14
	4	376	404.8	362.88	104.12	139.42	189.06	163.87	162.15	81.28	27.66	36.9	51.81	43.57	38.09	22.13
	5	365.71	484.62	365.36	101.76	143.03	199.24	166.29	228.58	81.31	27.68	29.8	54.58	45.38	47.3	22
	6			374.07			171.35			96.97			46.4			26.08
	Average	423.768	459.68	354.713	128.338	136.8	181.84	184.68	197.518	87.0767	29.994	30.324	51.2083	43.328	42.488	24.5633
	Std Error	34.4648	18.0165	8.87901	15.0889	6.84979	4.67585	15.5669	11.5588	5.13996	1.22198	1.82368	1.26676	0.755655	2.2642	1.18827
	WHOLE HIPPOCAMPUS
		HIPPO-Tom-WT-Dens	HIPPO-Tom-HET-Dens	HIPPO-Tom-KO-Dens	HIPPO-SST-WT-Dens	HIPPO-SST-HET-Dens	HIPPO-SST-KO-Dens	HIPPO-PV-WT-Dens	HIPPO-PV-HET-Dens	HIPPO-PV-KO-Dens	HIPPO-nNOS-WT-Dens	HIPPO-nNOS-HET-Dens	HIPPO-nNOS-KO-Dens	HIPPO-SST-WT-%	HIPPO-SST-HET-%	HIPPO-SST-KO-%	HIPPO-PV-WT-%	HIPPO-PV-HET-%	HIPPO-PV-KO-%	HIPPO-nNOS-WT-%	HIPPO-nNOS-HET-%	HIPPO-nNOS-KO-%
	1	155.66	144.19	144.53	38.91	38.32	49.15	45.04	40.2	34.59	42.31	40.65	47.9	25	26.57	34	28.94	27.88	23.93	31.49	31.97	40.83
	2	145.49	152	114.59	31.03	46.38	33.72	37.5	41.95	21.94	44.51	42.17	46.44	21.33	30.51	29.43	25.78	27.6	19.15	31.2	31.02	41.03
	3	118.65	95.67	124.81	26.6	29.87	33.38	22.68	28.65	27.63	32.04	36.62	38.53	22.42	31.22	26.74	19.11	29.95	22.14	25.45	28.82	33.27
	4	121.26	134.11	132.86	31.55	37.51	32.74	31.83	37.36	32.46	41.19	38.74	47.94	26.01	27.97	24.64	26.25	27.86	24.43	30.89	29.16	41.92
	5	117.55	133.23	132.34	33.49	32.45	35.06	33.82	41.86	32.2	37.48	40.12	46.87	28.49	24.36	36.8	28.77	31.42	24.33	28.6	30.81	37.32
	6			115.68			36.81			30.74			40.91			36.81			26.57			38.01
	Average	131.722	131.84	127.468	32.316	36.906	36.81	34.174	38.004	29.9267	39.506	39.66	44.765	24.65	28.126	31.4033	25.77	28.942	23.425	29.526	30.356	38.73
	Std Error	7.88594	9.68066	4.67542	1.99715	2.8415	2.53782	3.65283	2.48167	1.85343	2.18614	0.937545	1.64197	1.27893	1.26263	2.13293	1.78375	0.750203	1.03121	1.13999	0.593368	1.31902
	CA1
		CA1-Tom-WT-Dens	CA1-Tom-HET-Dens	CA1-Tom-KO-Dens	CA1-SST-WT-Dens	CA1-SST-HET-Dens	CA1-SST-KO-Dens	CA1-PV-WT-Dens	CA1-PV-HET-Dens	CA1-PV-KO-Dens	CA1-nNOS-WT-Dens	CA1-nNOS-HET-Dens	CA1-nNOS-KO-Dens	CA1-SST-WT-%	CA1-SST-HET-%	CA1-SST-KO-%	CA1-PV-WT-%	CA1-PV-HET-%	CA1-PV-KO-%	CA1-nNOS-WT-%	CA1-nNOS-HET-%	CA1-nNOS-KO-%
	1	156.43	149.13	162.16	44.2	41.82	61.37	49.33	44.92	39.14	42.77	42.77	47.76	28.25	27.9	37.17	31.44	30.07	24.09	33.94	34.19	36.71
	2	153.64	153.8	126.53	35.12	51.32	39.02	44.67	46.07	29.04	42.96	39.46	44.68	22.85	32.74	31.31	29.14	29.92	22.92	31.41	29.32	32.25
	3	143.05	154.63	132.2	33.63	58.1	36.9	53.58	45.99	33.42	32.25	34.32	37.37	23.69	36.84	27.42	37.46	30.02	25.09	25.11	27.84	30.46
	4	134.18	136.15	167.97	37.19	43.09	42.15	31.6	42.4	43.17	42.58	37.32	51.91	27.67	31.46	24.6	23.71	31.26	25.69	28.86	29.69	40.06
	5	127.42	185.29	145.22	41.97	49.32	42.14	33.74	56.39	37.08	38.12	55.75	46.01	33.1	27.66	29.26	26.59	32.47	25.79	27.03	32.64	33.56
	6			135.75			50.49			38.32			42.65			36.8			28.07			34.11
	Average	142.944	155.8	144.972	38.422	48.73	45.345	42.584	47.154	36.695	39.736	41.924	45.0633	27.112	31.32	31.0933	29.668	30.748	25.275	29.27	30.736	34.525
	Std Error	5.54116	8.07973	6.86215	2.0169	2.95306	3.71966	4.29905	2.40234	2.00014	2.07773	3.72131	2.0017	1.8349	1.69703	2.07008	2.33566	0.49511	0.7126	1.56333	1.16278	1.393
	CA2/3
		CA2/3-Tom-WT-Dens	CA2/3-Tom-HET-Dens	CA2/3-Tom-KO-Dens	CA2/3-SST-WT-Dens	CA2/3-SST-HET-Dens	CA2/3-SST-KO-Dens	CA2/3-PV-WT-Dens	CA2/3-PV-HET-Dens	CA2/3-PV-KO-Dens	CA2/3-nNOS-WT-Dens	CA2/3-nNOS-HET-Dens	CA2/3-nNOS-KO-Dens	CA2/3-SST-WT-%	CA2/3-SST-HET-%	CA2/3-SST-KO-%	CA2/3-PV-WT-%	CA2/3-PV-HET-%	CA2/3-PV-KO-%	CA2/3-nNOS-WT-%	CA2/3-nNOS-HET-%	CA2/3-nNOS-KO-%	CA2/3-Oligos-WT-Dens	CA2/3-Oligos-HET-Dens	CA2/3-Oligos-KO-Dens
	1	212.93	188.49	153.64	48.47	54.4	49.19	68.21	58.04	47.06	34.39	32.79	46.98	23.79	30.81	32.19	33	34.38	30.94	19.44	19.02	37.18	61.66	82.58	7.99
	2	188.62	203.97	131.03	40.16	63.34	43.44	59.69	60.76	27.62	42.9	39.49	46.75	21.43	31.36	33.38	31.98	30.46	20.46	22.67	21.14	39.55	90.94	71.8	9.95
	3	171.02	174.42	133.2	42.12	47.62	39.48	64.89	66.56	37.33	29.14	29.39	38.44	24.22	27.65	30.17	38.3	38.9	27.66	17.61	18.01	30.46	64.66	76.16	8.09
	4	151.95	179.25	130.39	48.18	50.11	37.95	49.54	55.18	44.34	33.65	32.25	47.76	26.76	28.34	28.9	32.69	32.36	34.6	22.11	17.08	39.5	57.74	71.35	7.2
	5	153.94	142.44	158.13	47.84	47.84	41.54	55.53	55.79	46.3	35.3	30.1	51.45	25.31	26.41	26.41	35.79	39.41	29.47	20.9	19.45	34.66	77.57	86.26	9.2
	6			119.72			32.92			35.53			40.75			27.28			29.14			38.25			7.15
	Average	175.692	177.714	137.685	45.354	52.662	40.7533	59.572	59.266	39.6967	35.076	32.804	45.355	24.302	28.914	29.7217	34.352	35.102	28.7117	20.546	18.94	36.6	70.514	77.63	8.26333
	Std Error	11.429	10.1562	6.09077	1.75089	2.93451	2.23499	3.31579	2.07021	3.09942	2.22492	1.78853	1.97098	0.88247	0.942733	1.11477	1.18049	1.76878	1.9113	0.919949	0.686695	1.43335	6.09445	2.95438	0.454501
	DENTATE GYRUS (DG)
		DG-Tom-WT-Dens	DG-Tom-HET-Dens	DG-Tom-KO-Dens	DG-SST-WT-Dens	DG-SST-HET-Dens	DG-SST-KO-Dens	DG-PV-WT-Dens	DG-PV-HET-Dens	DG-PV-KO-Dens	DG-nNOS-WT-Dens	DG-nNOS-HET-Dens	DG-nNOS-KO-Dens	DG-SST-WT-%	DG-SST-HET-%	DG-SST-KO-%	DG-PV-WT-%	DG-PV-HET-%	DG-PV-KO-%	DG-nNOS-WT-%	DG-nNOS-HET-%	DG-nNOS-KO-%
	1	109.83	103.16	95.99	19.45	18.21	21.41	20.41	19.49	13.43	49.34	44.86	51.5	17.72	17.98	22.1	18.19	18.94	13.85	46.78	47.24	58.27
	2	105.4	111.8	84.75	18.18	24.85	14.9	12.94	21.71	6.89	48.98	48.65	49.95	17.07	22.25	17.29	12.25	19.44	8.28	45.13	48.42	57.99
	3	99.25	104.97	100.91	16.54	21.79	19.96	22.86	22.83	7.16	34.17	46.96	42.75	16.79	21.2	19.78	22.82	21.64	7.16	36.2	48.35	47.65
	4	80.56	98.21	97.98	17.01	18.37	17.95	16.98	17.25	10.7	47.33	46.72	42.81	21.94	18.85	18.47	22.18	17.63	10.63	48.52	48.04	53.44
	5	73.96	88	94.07	13.69	13.69	16.35	18.24	17.61	14.08	38.06	43.2	49.1	19.37	15.16	17.31	24.84	20.75	14.97	47.37	48.81	55.99
	6			71.71			12.03			11.63			40.95			18.09			16.29			52.64
	Average	93.8	101.228	90.9017	16.974	19.382	17.1	18.286	19.778	10.6483	43.576	46.078	46.1767	18.578	19.088	18.84	20.056	19.68	11.8633	44.8	48.172	54.33
	Std Error	7.03614	3.95974	4.44358	0.96331	1.87742	1.39745	1.66914	1.10048	1.24865	3.12585	0.937328	1.83953	0.952299	1.24844	0.751754	2.22995	0.699793	1.52399	2.21847	0.263276	1.63244
	STRIATUM
		Stri-Tom-WT-Dens	Stri-Tom-HET-Dens	Stri-Tom-KO-Dens	Stri-SST-WT-Dens	Stri-SST-HET-Dens	Stri-SST-KO-Dens	Stri-PV-WT-Dens	Stri-PV-HET-Dens	Stri-PV-KO-Dens	Stri-SST-WT-%	Stri-SST-HET-%	Stri-SST-KO-%	Stri-PV-WT-%	Stri-PV-HET-%	Stri-PV-KO-%
	1	132.12	128.89	126.05	21.33	26.5	20.43	27	26.48	14.49	16.22	20.66	16.38	20.79	20.6	11.54
	2	121.84	138	141.73	14.4	20.06	23.68	16.8	30.09	14.29	11.84	14.49	16.72	13.88	21.6	10.18
	3	117.02	123.3	118.71	19.18	16.87	24.68	24.61	25.78	15.62	16.13	13.7	20.46	20.78	20.74	13.24
	4	190.75	118.18	127.7	30.4	18.59	22.22	42.74	30.64	14.23	16.05	15.68	17.23	22.79	25.88	11.13
	5	147.26	158.52	135.98	25.77	27.17	19.12	35.53	47.49	15.52	17.49	17.23	14.14	24.06	29.49	11.57
	6			143.49			26.78			19.87			18.64			13.89
	Average	141.798	133.378	132.277	22.216	21.838	22.8183	29.336	32.096	15.67	15.546	16.352	17.2617	20.46	23.662	11.925
	Std Error	13.2892	7.09285	3.96901	2.745	2.10424	1.14953	4.48874	3.96579	0.876269	0.963403	1.23048	0.874561	1.75921	1.74715	0.563967
	P30 Dlx5/6-Cre;Ezh2;Ai9 (WT = 4, Het = 3, KO = 5)
	WHOLE CORTEX
		DLX-CtxT-Tom-WT-Dens	DLX-CtxT-Tom-HET-Dens	DLX-CtxT-Tom-KO-Dens	DLX-CtxT-SST-WT-Dens	DLX-CtxT-SST-HET-Dens	DLX-CtxT-SST-KO-Dens	DLX-CtxT-PV-WT-Dens	DLX-CtxT-PV-HET-Dens	DLX-CtxT-PV-KO-Dens	DLX-CtxT-SST-WT-%	DLX-CtxT-SST-HET-%	DLX-CtxT-SST-KO-%	DLX-CtxT-PV-WT-%	DLX-CtxT-PV-HET-%	DLX-CtxT-PV-KO-%
	1	398.76	474.06	449.76	64.6	92.6	91.47	109.27	123.77	131.75	16.79	19.27	20.87	28.59	25.99	30.06
	2	441.81	431.59	396.57	83.87	74.66	83.99	118.51	123.81	96.93	18.96	17.47	20.78	26.19	29.25	24.21
	3	417.61	410.82	479.04	78.14	81.42	91.86	101.09	111.84	125.11	18.5	19.87	19.07	24.53	27.32	26.06
	4	419.26		425.02	77.34		83.02	117.9		107.14	18.3		19.87	27.96		25.43
	5			436.2			80.47			117.06			18.93			27.34
	Average	419.36	438.823	437.318	75.9875	82.8933	86.162	111.692	119.807	115.598	18.1375	18.87	19.904	26.8175	27.52	26.62
	Std Error	8.8102	18.6106	13.6169	4.0648	5.23096	2.31981	4.11595	3.98335	6.21906	0.469936	0.72111	0.409018	0.916218	0.946379	0.997241
	P5 Nkx2.1-Cre;Ezh2;Ai9 (WT = 4, Het = 4, KO = 4)
	WHOLE CORTEX
		WT-P5_Superficial	KO-P5_Superficial	WT-P5_Deep	KO-P5_Deep	WT-P5_TOTAL	KO-P5_TOTAL
	1	533.67	301.1	441.25	439.33	484.05	376.88
	2	588.6	370.61	667.74	441.51	631.33	408.78
	3	525.01	323.11	616.37	435.57	575.04	384.88
	4	558.59	423.66	719.77	539.91	649.82	489.59
	Average	551.467	354.62	611.283	464.08	585.06	415.032
	Std Error	14.2779	27.2021	60.48	25.3064	37.2359	25.7596

## Sheet: P30 Cortex NkxCre ANOVA+Tukey
	P30 Nkx2.1-Cre Cortex Statistics
	Tom+ cell Density-Whole Cortex										Tom+ cell Density-Deep Cortex										Tom+ cell Density-Superficial Cortex
	ANOVA summary										ANOVA summary										ANOVA summary
	F	8.396									F	32.06									F	5.198
	P value	0.0046									P value	<0.0001									P value	0.0219
	P value summary	**									P value summary	****									P value summary	*
	Significant diff. among means (P < 0.05)?	Yes									Significant diff. among means (P < 0.05)?	Yes									Significant diff. among means (P < 0.05)?	Yes
	R squared	0.5636									R squared	0.8314									R squared	0.4443
	ANOVA table	SS	DF	MS	F (DFn, DFd)	P value					ANOVA table	SS	DF	MS	F (DFn, DFd)	P value					ANOVA table	SS	DF	MS	F (DFn, DFd)	P value
	Treatment (between columns)	14509	2	7254	F (2, 13) = 8.396	P=0.0046					Treatment (between columns)	40989	2	20495	F (2, 13) = 32.06	P<0.0001					Treatment (between columns)	3987	2	1994	F (2, 13) = 5.198	P=0.0219
	Residual (within columns)	11232	13	864							Residual (within columns)	8311	13	639.3							Residual (within columns)	4986	13	383.6
	Total	25741	15								Total	49301	15								Total	8974	15
	Data summary										Data summary										Data summary
	Number of treatments (columns)	3									Number of treatments (columns)	3									Number of treatments (columns)	3
	Number of values (total)	16									Number of values (total)	16									Number of values (total)	16
	Tukey's multiple comparisons test	Mean Diff.	95.00% CI of diff.	Below threshold?	Summary	Adjusted P Value					Tukey's multiple comparisons test	Mean Diff.	95.00% CI of diff.	Below threshold?	Summary	Adjusted P Value					Tukey's multiple comparisons test	Mean Diff.	95.00% CI of diff.	Below threshold?	Summary	Adjusted P Value
	CtxT-Tom-WT-Dens vs. CtxT-Tom-HET-Dens	-23.48	-72.57 to 25.61	No	ns	0.4394					CtxD-PV-WT-Dens vs. CtxD-PV-HET-Dens	-12.84	-55.06 to 29.39	No	ns	0.7079					CtxS-Tom-WT-Dens vs. CtxS-Tom-HET-Dens	-11.05	-43.76 to 21.65	No	ns	0.6544
	CtxT-Tom-WT-Dens vs. CtxT-Tom-KO-Dens	47.43	0.4337 to 94.43	Yes	*	0.0478					CtxD-PV-WT-Dens vs. CtxD-PV-KO-Dens	97.6	57.18 to 138.0	Yes	****	<0.0001					CtxS-Tom-WT-Dens vs. CtxS-Tom-KO-Dens	25.81	-5.505 to 57.12	No	ns	0.113
	CtxT-Tom-HET-Dens vs. CtxT-Tom-KO-Dens	70.91	23.92 to 117.9	Yes	**	0.0041					CtxD-PV-HET-Dens vs. CtxD-PV-KO-Dens	110.4	70.01 to 150.9	Yes	****	<0.0001					CtxS-Tom-HET-Dens vs. CtxS-Tom-KO-Dens	36.86	5.547 to 68.17	Yes	*	0.0212
	Test details	Mean 1	Mean 2	Mean Diff.	SE of diff.	n1	n2	q	DF		Test details	Mean 1	Mean 2	Mean Diff.	SE of diff.	n1	n2	q	DF		Test details	Mean 1	Mean 2	Mean Diff.	SE of diff.	n1	n2	q	DF
	CtxT-Tom-WT-Dens vs. CtxT-Tom-HET-Dens	289.4	312.9	-23.48	18.59	5	5	1.786	13		CtxD-PV-WT-Dens vs. CtxD-PV-HET-Dens	184.7	197.5	-12.84	15.99	5	5	1.135	13		CtxS-Tom-WT-Dens vs. CtxS-Tom-HET-Dens	155	166.1	-11.05	12.39	5	5	1.262	13
	CtxT-Tom-WT-Dens vs. CtxT-Tom-KO-Dens	289.4	242	47.43	17.8	5	6	3.769	13		CtxD-PV-WT-Dens vs. CtxD-PV-KO-Dens	184.7	87.08	97.6	15.31	5	6	9.015	13		CtxS-Tom-WT-Dens vs. CtxS-Tom-KO-Dens	155	129.2	25.81	11.86	5	6	3.078	13
	CtxT-Tom-HET-Dens vs. CtxT-Tom-KO-Dens	312.9	242	70.91	17.8	5	6	5.634	13		CtxD-PV-HET-Dens vs. CtxD-PV-KO-Dens	197.5	87.08	110.4	15.31	5	6	10.2	13		CtxS-Tom-HET-Dens vs. CtxS-Tom-KO-Dens	166.1	129.2	36.86	11.86	5	6	4.396	13
	PV+ cell Density-Whole Cortex										PV+ cell Density-Deep Cortex										PV+ cell Density-Superficial Cortex										% PV+ cell-Whole Cortex										% PV+ cell-Deep Cortex
	ANOVA summary										ANOVA summary										ANOVA summary										ANOVA summary										ANOVA summary
	F	30.84									F	6.301									F	8.65									F	19.23									F	52.55
	P value	<0.0001									P value	0.0122									P value	0.0041									P value	0.0001									P value	<0.0001
	P value summary	****									P value summary	*									P value summary	**									P value summary	***									P value summary	****
	Significant diff. among means (P < 0.05)?	Yes									Significant diff. among means (P < 0.05)?	Yes									Significant diff. among means (P < 0.05)?	Yes									Significant diff. among means (P < 0.05)?	Yes									Significant diff. among means (P < 0.05)?	Yes
	R squared	0.8259									R squared	0.4922									R squared	0.571									R squared	0.7474									R squared	0.8899
	ANOVA table	SS	DF	MS	F (DFn, DFd)	P value					ANOVA table	SS	DF	MS	F (DFn, DFd)	P value					ANOVA table	SS	DF	MS	F (DFn, DFd)	P value					ANOVA table	SS	DF	MS	F (DFn, DFd)	P value					ANOVA table	SS	DF	MS	F (DFn, DFd)	P value
	Treatment (between columns)	15879	2	7940	F (2, 13) = 30.84	P<0.0001					Treatment (between columns)	31615	2	15807	F (2, 13) = 6.301	P=0.0122					Treatment (between columns)	2475	2	1237	F (2, 13) = 8.650	P=0.0041					Treatment (between columns)	741	2	370.5	F (2, 13) = 19.23	P=0.0001					Treatment (between columns)	1264	2	631.9	F (2, 13) = 52.55	P<0.0001
	Residual (within columns)	3347	13	257.4							Residual (within columns)	32613	13	2509							Residual (within columns)	1860	13	143.1							Residual (within columns)	250.5	13	19.27							Residual (within columns)	156.3	13	12.02
	Total	19226	15								Total	64228	15								Total	4335	15								Total	991.5	15								Total	1420	15
	Data summary										Data summary										Data summary										Data summary										Data summary
	Number of treatments (columns)	3									Number of treatments (columns)	3									Number of treatments (columns)	3									Number of treatments (columns)	3									Number of treatments (columns)	3
	Number of values (total)	16									Number of values (total)	16									Number of values (total)	16									Number of values (total)	16									Number of values (total)	16
	Tukey's multiple comparisons test	Mean Diff.	95.00% CI of diff.	Below threshold?	Summary	Adjusted P Value					Tukey's multiple comparisons test	Mean Diff.	95.00% CI of diff.	Below threshold?	Summary	Adjusted P Value					Tukey's multiple comparisons test	Mean Diff.	95.00% CI of diff.	Below threshold?	Summary	Adjusted P Value					Tukey's multiple comparisons test	Mean Diff.	95.00% CI of diff.	Below threshold?	Summary	Adjusted P Value					Tukey's multiple comparisons test	Mean Diff.	95.00% CI of diff.	Below threshold?	Summary	Adjusted P Value
	CtxT-PV-WT-Dens vs. CtxT-PV-HET-Dens	-9.438	-36.23 to 17.36	No	ns	0.6317					CtxD-Tom-WT-Dens vs. CtxD-Tom-HET-Dens	-35.91	-119.6 to 47.73	No	ns	0.5113					CtxS-PV-WT-Dens vs. CtxS-PV-HET-Dens	-6.038	-26.01 to 13.94	No	ns	0.7106					CtxT-PV-WT-% vs. CtxT-PV-HET-%	-0.74	-8.070 to 6.590	No	ns	0.9617					CtxD-PV-WT-% vs. CtxD-PV-HET-%	0.84	-4.951 to 6.631	No	ns	0.9228
	CtxT-PV-WT-Dens vs. CtxT-PV-KO-Dens	59.9	34.24 to 85.55	Yes	****	<0.0001					CtxD-Tom-WT-Dens vs. CtxD-Tom-KO-Dens	69.05	-11.03 to 149.1	No	ns	0.0951					CtxS-PV-WT-Dens vs. CtxS-PV-KO-Dens	22.19	3.070 to 41.32	Yes	*	0.023					CtxT-PV-WT-% vs. CtxT-PV-KO-%	13.67	6.656 to 20.69	Yes	***	0.0005					CtxD-PV-WT-% vs. CtxD-PV-KO-%	18.76	13.22 to 24.31	Yes	****	<0.0001
	CtxT-PV-HET-Dens vs. CtxT-PV-KO-Dens	69.33	43.68 to 94.99	Yes	****	<0.0001					CtxD-Tom-HET-Dens vs. CtxD-Tom-KO-Dens	105	24.88 to 185.0	Yes	*	0.011					CtxS-PV-HET-Dens vs. CtxS-PV-KO-Dens	28.23	9.108 to 47.35	Yes	**	0.0048					CtxT-PV-HET-% vs. CtxT-PV-KO-%	14.41	7.396 to 21.43	Yes	***	0.0003					CtxD-PV-HET-% vs. CtxD-PV-KO-%	17.92	12.38 to 23.47	Yes	****	<0.0001
	Test details	Mean 1	Mean 2	Mean Diff.	SE of diff.	n1	n2	q	DF		Test details	Mean 1	Mean 2	Mean Diff.	SE of diff.	n1	n2	q	DF		Test details	Mean 1	Mean 2	Mean Diff.	SE of diff.	n1	n2	q	DF		Test details	Mean 1	Mean 2	Mean Diff.	SE of diff.	n1	n2	q	DF		Test details	Mean 1	Mean 2	Mean Diff.	SE of diff.	n1	n2	q	DF
	CtxT-PV-WT-Dens vs. CtxT-PV-HET-Dens	127.9	137.3	-9.438	10.15	5	5	1.315	13		CtxD-Tom-WT-Dens vs. CtxD-Tom-HET-Dens	423.8	459.7	-35.91	31.68	5	5	1.603	13		CtxS-PV-WT-Dens vs. CtxS-PV-HET-Dens	71.12	77.16	-6.038	7.564	5	5	1.129	13		CtxT-PV-WT-% vs. CtxT-PV-HET-%	44.77	45.51	-0.74	2.776	5	5	0.377	13		CtxD-PV-WT-% vs. CtxD-PV-HET-%	43.33	42.49	0.84	2.193	5	5	0.5417	13
	CtxT-PV-WT-Dens vs. CtxT-PV-KO-Dens	127.9	68	59.9	9.715	5	6	8.719	13		CtxD-Tom-WT-Dens vs. CtxD-Tom-KO-Dens	423.8	354.7	69.05	30.33	5	6	3.22	13		CtxS-PV-WT-Dens vs. CtxS-PV-KO-Dens	71.12	48.93	22.19	7.242	5	6	4.334	13		CtxT-PV-WT-% vs. CtxT-PV-KO-%	44.77	31.1	13.67	2.658	5	6	7.275	13		CtxD-PV-WT-% vs. CtxD-PV-KO-%	43.33	24.56	18.76	2.1	5	6	12.64	13
	CtxT-PV-HET-Dens vs. CtxT-PV-KO-Dens	137.3	68	69.33	9.715	5	6	10.09	13		CtxD-Tom-HET-Dens vs. CtxD-Tom-KO-Dens	459.7	354.7	105	30.33	5	6	4.894	13		CtxS-PV-HET-Dens vs. CtxS-PV-KO-Dens	77.16	48.93	28.23	7.242	5	6	5.513	13		CtxT-PV-HET-% vs. CtxT-PV-KO-%	45.51	31.1	14.41	2.658	5	6	7.669	13		CtxD-PV-HET-% vs. CtxD-PV-KO-%	42.49	24.56	17.92	2.1	5	6	12.07	13
	SST+ cell Density-Whole Cortex										SST+ cell Density-Deep Cortex										SST+ cell Density-Superficial Cortex										% SST+ cell-Whole Cortex										% SST+ cell-Deep Cortex
	ANOVA summary										ANOVA summary										ANOVA summary										ANOVA summary										ANOVA summary
	F	9.255									F	9.814									F	3.404									F	57.49									F	74.74
	P value	0.0032									P value	0.0025									P value	0.0647									P value	<0.0001									P value	<0.0001
	P value summary	**									P value summary	**									P value summary	ns									P value summary	****									P value summary	****
	Significant diff. among means (P < 0.05)?	Yes									Significant diff. among means (P < 0.05)?	Yes									Significant diff. among means (P < 0.05)?	No									Significant diff. among means (P < 0.05)?	Yes									Significant diff. among means (P < 0.05)?	Yes
	R squared	0.5874									R squared	0.6016									R squared	0.3437									R squared	0.8984									R squared	0.92
	ANOVA table	SS	DF	MS	F (DFn, DFd)	P value					ANOVA table	SS	DF	MS	F (DFn, DFd)	P value					ANOVA table	SS	DF	MS	F (DFn, DFd)	P value					ANOVA table	SS	DF	MS	F (DFn, DFd)	P value					ANOVA table	SS	DF	MS	F (DFn, DFd)	P value
	Treatment (between columns)	3304	2	1652	F (2, 13) = 9.255	P=0.0032					Treatment (between columns)	9283	2	4641	F (2, 13) = 9.814	P=0.0025					Treatment (between columns)	430.4	2	215.2	F (2, 13) = 3.404	P=0.0647					Treatment (between columns)	1162	2	580.8	F (2, 13) = 57.49	P<0.0001					Treatment (between columns)	1662	2	830.9	F (2, 13) = 74.74	P<0.0001
	Residual (within columns)	2321	13	178.5							Residual (within columns)	6148	13	472.9							Residual (within columns)	821.7	13	63.21							Residual (within columns)	131.3	13	10.1							Residual (within columns)	144.5	13	11.12
	Total	5625	15								Total	15430	15								Total	1252	15								Total	1293	15								Total	1806	15
	Data summary										Data summary										Data summary										Data summary										Data summary
	Number of treatments (columns)	3									Number of treatments (columns)	3									Number of treatments (columns)	3									Number of treatments (columns)	3									Number of treatments (columns)	3
	Number of values (total)	16									Number of values (total)	16									Number of values (total)	16									Number of values (total)	16									Number of values (total)	16
	Tukey's multiple comparisons test	Mean Diff.	95.00% CI of diff.	Below threshold?	Summary	Adjusted P Value					Tukey's multiple comparisons test	Mean Diff.	95.00% CI of diff.	Below threshold?	Summary	Adjusted P Value					Tukey's multiple comparisons test	Mean Diff.	95.00% CI of diff.	Below threshold?	Summary	Adjusted P Value					Tukey's multiple comparisons test	Mean Diff.	95.00% CI of diff.	Below threshold?	Summary	Adjusted P Value					Tukey's multiple comparisons test	Mean Diff.	95.00% CI of diff.	Below threshold?	Summary	Adjusted P Value
	CtxT-SST-WT-Dens vs. CtxT-SST-HET-Dens	-1.896	-24.21 to 20.42	No	ns	0.9727					CtxD-SST-WT-Dens vs. CtxD-SST-HET-Dens	-8.462	-44.78 to 27.85	No	ns	0.8145					CtxS-SST-WT-Dens vs. CtxS-SST-HET-Dens	4.666	-8.611 to 17.94	No	ns	0.633					CtxT-SST-WT-% vs. CtxT-SST-HET-%	1.582	-3.726 to 6.890	No	ns	0.7172					CtxD-SST-WT-% vs. CtxD-SST-HET-%	-0.33	-5.898 to 5.238	No	ns	0.9866
	CtxT-SST-WT-Dens vs. CtxT-SST-KO-Dens	-30.59	-51.95 to -9.230	Yes	**	0.006					CtxD-SST-WT-Dens vs. CtxD-SST-KO-Dens	-53.5	-88.27 to -18.73	Yes	**	0.0036					CtxS-SST-WT-Dens vs. CtxS-SST-KO-Dens	-7.68	-20.39 to 5.032	No	ns	0.2824					CtxT-SST-WT-% vs. CtxT-SST-KO-%	-16.76	-21.84 to -11.68	Yes	****	<0.0001					CtxD-SST-WT-% vs. CtxD-SST-KO-%	-21.21	-26.55 to -15.88	Yes	****	<0.0001
	CtxT-SST-HET-Dens vs. CtxT-SST-KO-Dens	-28.7	-50.06 to -7.334	Yes	**	0.0093					CtxD-SST-HET-Dens vs. CtxD-SST-KO-Dens	-45.04	-79.81 to -10.27	Yes	*	0.0118					CtxS-SST-HET-Dens vs. CtxS-SST-KO-Dens	-12.35	-25.06 to 0.3661	No	ns	0.0573					CtxT-SST-HET-% vs. CtxT-SST-KO-%	-18.34	-23.42 to -13.26	Yes	****	<0.0001					CtxD-SST-HET-% vs. CtxD-SST-KO-%	-20.88	-26.22 to -15.55	Yes	****	<0.0001
	Test details	Mean 1	Mean 2	Mean Diff.	SE of diff.	n1	n2	q	DF		Test details	Mean 1	Mean 2	Mean Diff.	SE of diff.	n1	n2	q	DF		Test details	Mean 1	Mean 2	Mean Diff.	SE of diff.	n1	n2	q	DF		Test details	Mean 1	Mean 2	Mean Diff.	SE of diff.	n1	n2	q	DF		Test details	Mean 1	Mean 2	Mean Diff.	SE of diff.	n1	n2	q	DF
	CtxT-SST-WT-Dens vs. CtxT-SST-HET-Dens	86.61	88.5	-1.896	8.45	5	5	0.3173	13		CtxD-SST-WT-Dens vs. CtxD-SST-HET-Dens	128.3	136.8	-8.462	13.75	5	5	0.8701	13		CtxS-SST-WT-Dens vs. CtxS-SST-HET-Dens	44.88	40.22	4.666	5.028	5	5	1.312	13		CtxT-SST-WT-% vs. CtxT-SST-HET-%	29.19	27.61	1.582	2.01	5	5	1.113	13		CtxD-SST-WT-% vs. CtxD-SST-HET-%	29.99	30.32	-0.33	2.109	5	5	0.2213	13
	CtxT-SST-WT-Dens vs. CtxT-SST-KO-Dens	86.61	117.2	-30.59	8.09	5	6	5.348	13		CtxD-SST-WT-Dens vs. CtxD-SST-KO-Dens	128.3	181.8	-53.5	13.17	5	6	5.746	13		CtxS-SST-WT-Dens vs. CtxS-SST-KO-Dens	44.88	52.56	-7.68	4.814	5	6	2.256	13		CtxT-SST-WT-% vs. CtxT-SST-KO-%	29.19	45.96	-16.76	1.925	5	6	12.32	13		CtxD-SST-WT-% vs. CtxD-SST-KO-%	29.99	51.21	-21.21	2.019	5	6	14.86	13
	CtxT-SST-HET-Dens vs. CtxT-SST-KO-Dens	88.5	117.2	-28.7	8.09	5	6	5.016	13		CtxD-SST-HET-Dens vs. CtxD-SST-KO-Dens	136.8	181.8	-45.04	13.17	5	6	4.837	13		CtxS-SST-HET-Dens vs. CtxS-SST-KO-Dens	40.22	52.56	-12.35	4.814	5	6	3.627	13		CtxT-SST-HET-% vs. CtxT-SST-KO-%	27.61	45.96	-18.34	1.925	5	6	13.48	13		CtxD-SST-HET-% vs. CtxD-SST-KO-%	30.32	51.21	-20.88	2.019	5	6	14.63	13

## Sheet: P30 Hippo NkxCre ANOVA+Tukey
	P30 Nkx2.1-Cre Hippocampus Statistics
	Tom+ cell Density-Whole Hippocampus										Tom+ cell Density-CA1										Tom+ cell Density-CA2/3										Tom+ cell Density-DG
	ANOVA summary										ANOVA summary										ANOVA summary										ANOVA summary
	F	0.1202									F	0.9476									F	6.422									F	1.035
	P value	0.8877									P value	0.4129									P value	0.0115									P value	0.3828
	P value summary	ns									P value summary	ns									P value summary	*									P value summary	ns
	Significant diff. among means (P < 0.05)?	No									Significant diff. among means (P < 0.05)?	No									Significant diff. among means (P < 0.05)?	Yes									Significant diff. among means (P < 0.05)?	No
	R squared	0.01816									R squared	0.1272									R squared	0.497									R squared	0.1374
	ANOVA table	SS	DF	MS	F (DFn, DFd)	P value					ANOVA table	SS	DF	MS	F (DFn, DFd)	P value					ANOVA table	SS	DF	MS	F (DFn, DFd)	P value					ANOVA table	SS	DF	MS	F (DFn, DFd)	P value
	Treatment (between columns)	69.78	2	34.89	F (2, 13) = 0.1202	P=0.8877					Treatment (between columns)	485.8	2	242.9	F (2, 13) = 0.9476	P=0.4129					Treatment (between columns)	5719	2	2860	F (2, 13) = 6.422	P=0.0115					Treatment (between columns)	301.9	2	150.9	F (2, 13) = 1.035	P=0.3828
	Residual (within columns)	3774	13	290.3							Residual (within columns)	3332	13	256.3							Residual (within columns)	5788	13	445.3							Residual (within columns)	1896	13	145.9
	Total	3844	15								Total	3818	15								Total	11508	15								Total	2198	15
	Data summary										Data summary										Data summary										Data summary
	Number of treatments (columns)	3									Number of treatments (columns)	3									Number of treatments (columns)	3									Number of treatments (columns)	3
	Number of values (total)	16									Number of values (total)	16									Number of values (total)	16									Number of values (total)	16
	Tukey's multiple comparisons test	Mean Diff.	95.00% CI of diff.	Below threshold?	Summary	Adjusted P Value					Tukey's multiple comparisons test	Mean Diff.	95.00% CI of diff.	Below threshold?	Summary	Adjusted P Value					Tukey's multiple comparisons test	Mean Diff.	95.00% CI of diff.	Below threshold?	Summary	Adjusted P Value					Tukey's multiple comparisons test	Mean Diff.	95.00% CI of diff.	Below threshold?	Summary	Adjusted P Value
	HIPPO-Tom-WT-Dens vs. HIPPO-Tom-HET-Dens	-0.118	-28.57 to 28.33	No	ns	>0.9999					CA1-Tom-WT-Dens vs. CA1-Tom-HET-Dens	-12.86	-39.59 to 13.88	No	ns	0.4359					CA2/3-Tom-WT-Dens vs. CA2/3-Tom-HET-Dens	-2.022	-37.26 to 33.22	No	ns	0.9874					DG-Tom-WT-Dens vs. DG-Tom-HET-Dens	-7.428	-27.60 to 12.74	No	ns	0.6062
	HIPPO-Tom-WT-Dens vs. HIPPO-Tom-KO-Dens	4.254	-22.99 to 31.50	No	ns	0.9112					CA1-Tom-WT-Dens vs. CA1-Tom-KO-Dens	-2.028	-27.63 to 23.57	No	ns	0.9762					CA2/3-Tom-WT-Dens vs. CA2/3-Tom-KO-Dens	38.01	4.269 to 71.74	Yes	*	0.0271					DG-Tom-WT-Dens vs. DG-Tom-KO-Dens	2.898	-16.41 to 22.21	No	ns	0.9176
	HIPPO-Tom-HET-Dens vs. HIPPO-Tom-KO-Dens	4.372	-22.87 to 31.61	No	ns	0.9065					CA1-Tom-HET-Dens vs. CA1-Tom-KO-Dens	10.83	-14.77 to 36.43	No	ns	0.521					CA2/3-Tom-HET-Dens vs. CA2/3-Tom-KO-Dens	40.03	6.291 to 73.77	Yes	*	0.0202					DG-Tom-HET-Dens vs. DG-Tom-KO-Dens	10.33	-8.983 to 29.64	No	ns	0.3635
	Test details	Mean 1	Mean 2	Mean Diff.	SE of diff.	n1	n2	q	DF		Test details	Mean 1	Mean 2	Mean Diff.	SE of diff.	n1	n2	q	DF		Test details	Mean 1	Mean 2	Mean Diff.	SE of diff.	n1	n2	q	DF		Test details	Mean 1	Mean 2	Mean Diff.	SE of diff.	n1	n2	q	DF
	HIPPO-Tom-WT-Dens vs. HIPPO-Tom-HET-Dens	131.7	131.8	-0.118	10.78	5	5	0.01549	13		CA1-Tom-WT-Dens vs. CA1-Tom-HET-Dens	142.9	155.8	-12.86	10.13	5	5	1.795	13		CA2/3-Tom-WT-Dens vs. CA2/3-Tom-HET-Dens	175.7	177.7	-2.022	13.35	5	5	0.2143	13		DG-Tom-WT-Dens vs. DG-Tom-HET-Dens	93.8	101.2	-7.428	7.638	5	5	1.375	13
	HIPPO-Tom-WT-Dens vs. HIPPO-Tom-KO-Dens	131.7	127.5	4.254	10.32	5	6	0.5831	13		CA1-Tom-WT-Dens vs. CA1-Tom-KO-Dens	142.9	145	-2.028	9.695	5	6	0.2958	13		CA2/3-Tom-WT-Dens vs. CA2/3-Tom-KO-Dens	175.7	137.7	38.01	12.78	5	6	4.207	13		DG-Tom-WT-Dens vs. DG-Tom-KO-Dens	93.8	90.9	2.898	7.313	5	6	0.5605	13
	HIPPO-Tom-HET-Dens vs. HIPPO-Tom-KO-Dens	131.8	127.5	4.372	10.32	5	6	0.5992	13		CA1-Tom-HET-Dens vs. CA1-Tom-KO-Dens	155.8	145	10.83	9.695	5	6	1.58	13		CA2/3-Tom-HET-Dens vs. CA2/3-Tom-KO-Dens	177.7	137.7	40.03	12.78	5	6	4.43	13		DG-Tom-HET-Dens vs. DG-Tom-KO-Dens	101.2	90.9	10.33	7.313	5	6	1.997	13
	PV+ cell Density-Whole Hippocampus										PV+ cell Density-CA1										PV+ cell Density-CA2/3										PV+ cell Density-DG										% PV+ cell-Whole Hippocampus
	ANOVA summary										ANOVA summary										ANOVA summary										ANOVA summary										ANOVA summary
	F	2.361									F	3.252									F	15.97									F	13.81									F	5.058
	P value	0.1335									P value	0.0716									P value	0.0003									P value	0.0006									P value	0.0237
	P value summary	ns									P value summary	ns									P value summary	***									P value summary	***									P value summary	*
	Significant diff. among means (P < 0.05)?	No									Significant diff. among means (P < 0.05)?	No									Significant diff. among means (P < 0.05)?	Yes									Significant diff. among means (P < 0.05)?	Yes									Significant diff. among means (P < 0.05)?	Yes
	R squared	0.2664									R squared	0.3335									R squared	0.7107									R squared	0.6799									R squared	0.4376
	ANOVA table	SS	DF	MS	F (DFn, DFd)	P value					ANOVA table	SS	DF	MS	F (DFn, DFd)	P value					ANOVA table	SS	DF	MS	F (DFn, DFd)	P value					ANOVA table	SS	DF	MS	F (DFn, DFd)	P value					ANOVA table	SS	DF	MS	F (DFn, DFd)	P value
	Treatment (between columns)	179.1	2	89.54	F (2, 13) = 2.361	P=0.1335					Treatment (between columns)	302.8	2	151.4	F (2, 13) = 3.252	P=0.0716					Treatment (between columns)	1459	2	729.4	F (2, 13) = 15.97	P=0.0003					Treatment (between columns)	269.1	2	134.6	F (2, 13) = 13.81	P=0.0006					Treatment (between columns)	83.1	2	41.55	F (2, 13) = 5.058	P=0.0237
	Residual (within columns)	493.1	13	37.93							Residual (within columns)	605.1	13	46.54							Residual (within columns)	593.8	13	45.68							Residual (within columns)	126.7	13	9.747							Residual (within columns)	106.8	13	8.215
	Total	672.2	15								Total	907.8	15								Total	2053	15								Total	395.9	15								Total	189.9	15
	Data summary										Data summary										Data summary										Data summary										Data summary
	Number of treatments (columns)	3									Number of treatments (columns)	3									Number of treatments (columns)	3									Number of treatments (columns)	3									Number of treatments (columns)	3
	Number of values (total)	16									Number of values (total)	16									Number of values (total)	16									Number of values (total)	16									Number of values (total)	16
	Tukey's multiple comparisons test	Mean Diff.	95.00% CI of diff.	Below threshold?	Summary	Adjusted P Value					Tukey's multiple comparisons test	Mean Diff.	95.00% CI of diff.	Below threshold?	Summary	Adjusted P Value					Tukey's multiple comparisons test	Mean Diff.	95.00% CI of diff.	Below threshold?	Summary	Adjusted P Value					Tukey's multiple comparisons test	Mean Diff.	95.00% CI of diff.	Below threshold?	Summary	Adjusted P Value					Tukey's multiple comparisons test	Mean Diff.	95.00% CI of diff.	Below threshold?	Summary	Adjusted P Value
	HIPPO-PV-WT-Dens vs. HIPPO-PV-HET-Dens	-3.83	-14.11 to 6.455	No	ns	0.5997	G-H				CA1-PV-WT-Dens vs. CA1-PV-HET-Dens	-4.57	-15.96 to 6.823	No	ns	0.5547					CA2/3-PV-WT-Dens vs. CA2/3-PV-HET-Dens	0.306	-10.98 to 11.59	No	ns	0.9972					DG-PV-WT-Dens vs. DG-PV-HET-Dens	-1.492	-6.706 to 3.722	No	ns	0.7357					HIPPO-PV-WT-% vs. HIPPO-PV-HET-%	-3.172	-7.958 to 1.614	No	ns	0.2247
	HIPPO-PV-WT-Dens vs. HIPPO-PV-KO-Dens	4.247	-5.600 to 14.09	No	ns	0.5083	G-I				CA1-PV-WT-Dens vs. CA1-PV-KO-Dens	5.889	-5.019 to 16.80	No	ns	0.3571					CA2/3-PV-WT-Dens vs. CA2/3-PV-KO-Dens	19.88	9.069 to 30.68	Yes	***	0.0009					DG-PV-WT-Dens vs. DG-PV-KO-Dens	7.638	2.646 to 12.63	Yes	**	0.0037					HIPPO-PV-WT-% vs. HIPPO-PV-KO-%	2.345	-2.238 to 6.928	No	ns	0.3936
	HIPPO-PV-HET-Dens vs. HIPPO-PV-KO-Dens	8.077	-1.770 to 17.92	No	ns	0.115	H-I				CA1-PV-HET-Dens vs. CA1-PV-KO-Dens	10.46	-0.4490 to 21.37	No	ns	0.0608					CA2/3-PV-HET-Dens vs. CA2/3-PV-KO-Dens	19.57	8.763 to 30.38	Yes	***	0.001					DG-PV-HET-Dens vs. DG-PV-KO-Dens	9.13	4.138 to 14.12	Yes	***	0.0009					HIPPO-PV-HET-% vs. HIPPO-PV-KO-%	5.517	0.9344 to 10.10	Yes	*	0.0186
	Test details	Mean 1	Mean 2	Mean Diff.	SE of diff.	n1	n2	q	DF		Test details	Mean 1	Mean 2	Mean Diff.	SE of diff.	n1	n2	q	DF		Test details	Mean 1	Mean 2	Mean Diff.	SE of diff.	n1	n2	q	DF		Test details	Mean 1	Mean 2	Mean Diff.	SE of diff.	n1	n2	q	DF		Test details	Mean 1	Mean 2	Mean Diff.	SE of diff.	n1	n2	q	DF
	HIPPO-PV-WT-Dens vs. HIPPO-PV-HET-Dens	34.17	38	-3.83	3.895	5	5	1.391	13		CA1-PV-WT-Dens vs. CA1-PV-HET-Dens	42.58	47.15	-4.57	4.315	5	5	1.498	13		CA2/3-PV-WT-Dens vs. CA2/3-PV-HET-Dens	59.57	59.27	0.306	4.274	5	5	0.1012	13		DG-PV-WT-Dens vs. DG-PV-HET-Dens	18.29	19.78	-1.492	1.975	5	5	1.069	13		HIPPO-PV-WT-% vs. HIPPO-PV-HET-%	25.77	28.94	-3.172	1.813	5	5	2.475	13
	HIPPO-PV-WT-Dens vs. HIPPO-PV-KO-Dens	34.17	29.93	4.247	3.729	5	6	1.611	13		CA1-PV-WT-Dens vs. CA1-PV-KO-Dens	42.58	36.7	5.889	4.131	5	6	2.016	13		CA2/3-PV-WT-Dens vs. CA2/3-PV-KO-Dens	59.57	39.7	19.88	4.092	5	6	6.868	13		DG-PV-WT-Dens vs. DG-PV-KO-Dens	18.29	10.65	7.638	1.891	5	6	5.713	13		HIPPO-PV-WT-% vs. HIPPO-PV-KO-%	25.77	23.43	2.345	1.736	5	6	1.911	13
	HIPPO-PV-HET-Dens vs. HIPPO-PV-KO-Dens	38	29.93	8.077	3.729	5	6	3.063	13		CA1-PV-HET-Dens vs. CA1-PV-KO-Dens	47.15	36.7	10.46	4.131	5	6	3.58	13		CA2/3-PV-HET-Dens vs. CA2/3-PV-KO-Dens	59.27	39.7	19.57	4.092	5	6	6.763	13		DG-PV-HET-Dens vs. DG-PV-KO-Dens	19.78	10.65	9.13	1.891	5	6	6.83	13		HIPPO-PV-HET-% vs. HIPPO-PV-KO-%	28.94	23.43	5.517	1.736	5	6	4.496	13
	SST+ cell Density-Whole Hippocampus										SST+ cell Density-CA1										SST+ cell Density-CA2/3										SST+ cell Density-DG										% SST+ cell-Whole Hippocampus
	ANOVA summary										ANOVA summary										ANOVA summary										ANOVA summary										ANOVA summary
	F	1.059									F	2.688									F	6.596									F	0.8301									F	4.026
	P value	0.3748									P value	0.1055									P value	0.0105									P value	0.4579									P value	0.0436
	P value summary	ns									P value summary	ns									P value summary	*									P value summary	ns									P value summary	*
	Significant diff. among means (P < 0.05)?	No									Significant diff. among means (P < 0.05)?	No									Significant diff. among means (P < 0.05)?	Yes									Significant diff. among means (P < 0.05)?	No									Significant diff. among means (P < 0.05)?	Yes
	R squared										R squared	0.2925									R squared	0.5037									R squared	0.1132									R squared	0.3825
	ANOVA table	SS	DF	MS	F (DFn, DFd)	P value					ANOVA table	SS	DF	MS	F (DFn, DFd)	P value					ANOVA table	SS	DF	MS	F (DFn, DFd)	P value					ANOVA table	SS	DF	MS	F (DFn, DFd)	P value					ANOVA table	SS	DF	MS	F (DFn, DFd)	P value
	Treatment (between columns)	70.8	2	35.4	F (2, 13) = 1.059	P=0.3748					Treatment (between columns)	277.4	2	138.7	F (2, 13) = 2.688	P=0.1055					Treatment (between columns)	389	2	194.5	F (2, 13) = 6.596	P=0.0105					Treatment (between columns)	18.85	2	9.427	F (2, 13) = 0.8301	P=0.4579					Treatment (between columns)	124.5	2	62.27	F (2, 13) = 4.026	P=0.0436
	Residual (within columns)	434.5	13	33.42							Residual (within columns)	670.8	13	51.6							Residual (within columns)	383.4	13	29.49							Residual (within columns)	147.6	13	11.36							Residual (within columns)	201.1	13	15.47
	Total	505.3	15								Total	948.2	15								Total	772.4	15								Total	166.5	15								Total	325.6	15
	Data summary										Data summary										Data summary										Data summary										Data summary
	Number of treatments (columns)	3									Number of treatments (columns)	3									Number of treatments (columns)	3									Number of treatments (columns)	3									Number of treatments (columns)	3
	Number of values (total)	16									Number of values (total)	16									Number of values (total)	16									Number of values (total)	16									Number of values (total)	16
	Tukey's multiple comparisons test	Mean Diff.	95.00% CI of diff.	Below threshold?	Summary	Adjusted P Value					Tukey's multiple comparisons test	Mean Diff.	95.00% CI of diff.	Below threshold?	Summary	Adjusted P Value					Tukey's multiple comparisons test	Mean Diff.	95.00% CI of diff.	Below threshold?	Summary	Adjusted P Value					Tukey's multiple comparisons test	Mean Diff.	95.00% CI of diff.	Below threshold?	Summary	Adjusted P Value					Tukey's multiple comparisons test	Mean Diff.	95.00% CI of diff.	Below threshold?	Summary	Adjusted P Value
	HIPPO-SST-WT-Dens vs. HIPPO-SST-HET-Dens	-4.59	-14.24 to 5.064	No	ns	0.4435					CA1-SST-WT-Dens vs. CA1-SST-HET-Dens	-10.31	-22.30 to 1.688	No	ns	0.0965					CA2/3-SST-WT-Dens vs. CA2/3-SST-HET-Dens	-7.308	-16.38 to 1.761	No	ns	0.1226					DG-SST-WT-Dens vs. DG-SST-HET-Dens	-2.408	-8.036 to 3.220	No	ns	0.5135					HIPPO-SST-WT-% vs. HIPPO-SST-HET-%	-3.476	-10.04 to 3.092	No	ns	0.3706
	HIPPO-SST-WT-Dens vs. HIPPO-SST-KO-Dens	-4.494	-13.74 to 4.749	No	ns	0.4284					CA1-SST-WT-Dens vs. CA1-SST-KO-Dens	-6.923	-18.41 to 4.563	No	ns	0.2838					CA2/3-SST-WT-Dens vs. CA2/3-SST-KO-Dens	4.601	-4.082 to 13.28	No	ns	0.3698					DG-SST-WT-Dens vs. DG-SST-KO-Dens	-0.126	-5.514 to 5.262	No	ns	0.9979					HIPPO-SST-WT-% vs. HIPPO-SST-KO-%	-6.753	-13.04 to -0.4652	Yes	*	0.035
	HIPPO-SST-HET-Dens vs. HIPPO-SST-KO-Dens	0.096	-9.147 to 9.339	No	ns	0.9996					CA1-SST-HET-Dens vs. CA1-SST-KO-Dens	3.385	-8.101 to 14.87	No	ns	0.7224					CA2/3-SST-HET-Dens vs. CA2/3-SST-KO-Dens	11.91	3.226 to 20.59	Yes	**	0.0081					DG-SST-HET-Dens vs. DG-SST-KO-Dens	2.282	-3.106 to 7.670	No	ns	0.5202					HIPPO-SST-HET-% vs. HIPPO-SST-KO-%	-3.277	-9.565 to 3.011	No	ns	0.3811
	Test details	Mean 1	Mean 2	Mean Diff.	SE of diff.	n1	n2	q	DF		Test details	Mean 1	Mean 2	Mean Diff.	SE of diff.	n1	n2	q	DF		Test details	Mean 1	Mean 2	Mean Diff.	SE of diff.	n1	n2	q	DF		Test details	Mean 1	Mean 2	Mean Diff.	SE of diff.	n1	n2	q	DF		Test details	Mean 1	Mean 2	Mean Diff.	SE of diff.	n1	n2	q	DF
	HIPPO-SST-WT-Dens vs. HIPPO-SST-HET-Dens	32.32	36.91	-4.59	3.656	5	5	1.775	13		CA1-SST-WT-Dens vs. CA1-SST-HET-Dens	38.42	48.73	-10.31	4.543	5	5	3.209	13		CA2/3-SST-WT-Dens vs. CA2/3-SST-HET-Dens	45.35	52.66	-7.308	3.435	5	5	3.009	13		DG-SST-WT-Dens vs. DG-SST-HET-Dens	16.97	19.38	-2.408	2.131	5	5	1.598	13		HIPPO-SST-WT-% vs. HIPPO-SST-HET-%	24.65	28.13	-3.476	2.487	5	5	1.976	13
	HIPPO-SST-WT-Dens vs. HIPPO-SST-KO-Dens	32.32	36.81	-4.494	3.501	5	6	1.816	13		CA1-SST-WT-Dens vs. CA1-SST-KO-Dens	38.42	45.35	-6.923	4.35	5	6	2.251	13		CA2/3-SST-WT-Dens vs. CA2/3-SST-KO-Dens	45.35	40.75	4.601	3.288	5	6	1.979	13		DG-SST-WT-Dens vs. DG-SST-KO-Dens	16.97	17.1	-0.126	2.041	5	6	0.08732	13		HIPPO-SST-WT-% vs. HIPPO-SST-KO-%	24.65	31.4	-6.753	2.381	5	6	4.01	13
	HIPPO-SST-HET-Dens vs. HIPPO-SST-KO-Dens	36.91	36.81	0.096	3.501	5	6	0.03878	13		CA1-SST-HET-Dens vs. CA1-SST-KO-Dens	48.73	45.35	3.385	4.35	5	6	1.101	13		CA2/3-SST-HET-Dens vs. CA2/3-SST-KO-Dens	52.66	40.75	11.91	3.288	5	6	5.121	13		DG-SST-HET-Dens vs. DG-SST-KO-Dens	19.38	17.1	2.282	2.041	5	6	1.581	13		HIPPO-SST-HET-% vs. HIPPO-SST-KO-%	28.13	31.4	-3.277	2.381	5	6	1.946	13
	nNos+ cell Density-Whole Hippocampus										nNos+ cell Density-CA1										nNos+ cell Density-CA2/3										nNos+ cell Density-DG										% nNos+ cell-Whole Hippocampus
	ANOVA summary										ANOVA summary										ANOVA summary										ANOVA summary										ANOVA summary
	F	3.375									F	1.064									F	11.66									F	0.4646									F	22.22
	P value	0.066									P value	0.3732									P value	0.0013									P value	0.6384									P value	<0.0001
	P value summary	ns									P value summary	ns									P value summary	**									P value summary	ns									P value summary	****
	Significant diff. among means (P < 0.05)?	No									Significant diff. among means (P < 0.05)?	No									Significant diff. among means (P < 0.05)?	Yes									Significant diff. among means (P < 0.05)?	No									Significant diff. among means (P < 0.05)?	Yes
	R squared	0.3418									R squared	0.1407									R squared	0.6421									R squared										R squared	0.7737
	ANOVA table	SS	DF	MS	F (DFn, DFd)	P value					ANOVA table	SS	DF	MS	F (DFn, DFd)	P value					ANOVA table	SS	DF	MS	F (DFn, DFd)	P value					ANOVA table	SS	DF	MS	F (DFn, DFd)	P value					ANOVA table	SS	DF	MS	F (DFn, DFd)	P value
	Treatment (between columns)	100.8	2	50.38	F (2, 13) = 3.375	P=0.0660					Treatment (between columns)	79.17	2	39.59	F (2, 13) = 1.064	P=0.3732					Treatment (between columns)	501.5	2	250.8	F (2, 13) = 11.66	P=0.0013					Treatment (between columns)	22.48	2	11.24	F (2, 13) = 0.4646	P=0.6384					Treatment (between columns)	291.4	2	145.7	F (2, 13) = 22.22	P<0.0001
	Residual (within columns)	194	13	14.93							Residual (within columns)	483.5	13	37.19							Residual (within columns)	279.5	13	21.5							Residual (within columns)	314.5	13	24.19							Residual (within columns)	85.23	13	6.556
	Total	294.8	15								Total	562.7	15								Total	781.1	15								Total	337	15								Total	376.6	15
	Data summary										Data summary										Data summary										Data summary										Data summary
	Number of treatments (columns)	3									Number of treatments (columns)	3									Number of treatments (columns)	3									Number of treatments (columns)	3									Number of treatments (columns)	3
	Number of values (total)	16									Number of values (total)	16									Number of values (total)	16									Number of values (total)	16									Number of values (total)	16
	Tukey's multiple comparisons test	Mean Diff.	95.00% CI of diff.	Below threshold?	Summary	Adjusted P Value					Tukey's multiple comparisons test	Mean Diff.	95.00% CI of diff.	Below threshold?	Summary	Adjusted P Value					Tukey's multiple comparisons test	Mean Diff.	95.00% CI of diff.	Below threshold?	Summary	Adjusted P Value					Tukey's multiple comparisons test	Mean Diff.	95.00% CI of diff.	Below threshold?	Summary	Adjusted P Value					Tukey's multiple comparisons test	Mean Diff.	95.00% CI of diff.	Below threshold?	Summary	Adjusted P Value
	HIPPO-nNOS-WT-Dens vs. HIPPO-nNOS-HET-Dens	-0.154	-6.606 to 6.298	No	ns	0.9978					CA1-nNOS-WT-Dens vs. CA1-nNOS-HET-Dens	-2.188	-12.37 to 7.996	No	ns	0.8395					CA2/3-nNOS-WT-Dens vs. CA2/3-nNOS-HET-Dens	2.272	-5.472 to 10.02	No	ns	0.7245					DG-nNOS-WT-Dens vs. DG-nNOS-HET-Dens	-2.502	-10.72 to 5.712	No	ns	0.707					HIPPO-nNOS-WT-% vs. HIPPO-nNOS-HET-%	-0.83	-5.106 to 3.446	No	ns	0.8666
	HIPPO-nNOS-WT-Dens vs. HIPPO-nNOS-KO-Dens	-5.259	-11.44 to 0.9182	No	ns	0.1					CA1-nNOS-WT-Dens vs. CA1-nNOS-KO-Dens	-5.327	-15.08 to 4.423	No	ns	0.349					CA2/3-nNOS-WT-Dens vs. CA2/3-nNOS-KO-Dens	-10.28	-17.69 to -2.865	Yes	**	0.0075					DG-nNOS-WT-Dens vs. DG-nNOS-KO-Dens	-2.601	-10.46 to 5.264	No	ns	0.6659					HIPPO-nNOS-WT-% vs. HIPPO-nNOS-KO-%	-9.204	-13.30 to -5.110	Yes	***	0.0001
	HIPPO-nNOS-HET-Dens vs. HIPPO-nNOS-KO-Dens	-5.105	-11.28 to 1.072	No	ns	0.1119					CA1-nNOS-HET-Dens vs. CA1-nNOS-KO-Dens	-3.139	-12.89 to 6.611	No	ns	0.6797					CA2/3-nNOS-HET-Dens vs. CA2/3-nNOS-KO-Dens	-12.55	-19.96 to -5.137	Yes	**	0.0017					DG-nNOS-HET-Dens vs. DG-nNOS-KO-Dens	-0.09867	-7.963 to 7.766	No	ns	0.9994					HIPPO-nNOS-HET-% vs. HIPPO-nNOS-KO-%	-8.374	-12.47 to -4.280	Yes	***	0.0003
	Test details	Mean 1	Mean 2	Mean Diff.	SE of diff.	n1	n2	q	DF		Test details	Mean 1	Mean 2	Mean Diff.	SE of diff.	n1	n2	q	DF		Test details	Mean 1	Mean 2	Mean Diff.	SE of diff.	n1	n2	q	DF		Test details	Mean 1	Mean 2	Mean Diff.	SE of diff.	n1	n2	q	DF		Test details	Mean 1	Mean 2	Mean Diff.	SE of diff.	n1	n2	q	DF
	HIPPO-nNOS-WT-Dens vs. HIPPO-nNOS-HET-Dens	39.51	39.66	-0.154	2.443	5	5	0.08913	13		CA1-nNOS-WT-Dens vs. CA1-nNOS-HET-Dens	39.74	41.92	-2.188	3.857	5	5	0.8022	13		CA2/3-nNOS-WT-Dens vs. CA2/3-nNOS-HET-Dens	35.08	32.8	2.272	2.933	5	5	1.096	13		DG-nNOS-WT-Dens vs. DG-nNOS-HET-Dens	43.58	46.08	-2.502	3.111	5	5	1.137	13		HIPPO-nNOS-WT-% vs. HIPPO-nNOS-HET-%	29.53	30.36	-0.83	1.619	5	5	0.7248	13
	HIPPO-nNOS-WT-Dens vs. HIPPO-nNOS-KO-Dens	39.51	44.77	-5.259	2.339	5	6	3.179	13		CA1-nNOS-WT-Dens vs. CA1-nNOS-KO-Dens	39.74	45.06	-5.327	3.693	5	6	2.04	13		CA2/3-nNOS-WT-Dens vs. CA2/3-nNOS-KO-Dens	35.08	45.36	-10.28	2.808	5	6	5.177	13		DG-nNOS-WT-Dens vs. DG-nNOS-KO-Dens	43.58	46.18	-2.601	2.978	5	6	1.235	13		HIPPO-nNOS-WT-% vs. HIPPO-nNOS-KO-%	29.53	38.73	-9.204	1.55	5	6	8.395	13
	HIPPO-nNOS-HET-Dens vs. HIPPO-nNOS-KO-Dens	39.66	44.77	-5.105	2.339	5	6	3.086	13		CA1-nNOS-HET-Dens vs. CA1-nNOS-KO-Dens	41.92	45.06	-3.139	3.693	5	6	1.202	13		CA2/3-nNOS-HET-Dens vs. CA2/3-nNOS-KO-Dens	32.8	45.36	-12.55	2.808	5	6	6.321	13		DG-nNOS-HET-Dens vs. DG-nNOS-KO-Dens	46.08	46.18	-0.09867	2.978	5	6	0.04685	13		HIPPO-nNOS-HET-% vs. HIPPO-nNOS-KO-%	30.36	38.73	-8.374	1.55	5	6	7.638	13
																					Oligodendrocyte Density-CA2/3
																					ANOVA summary
																					F	115.2
																					P value	<0.0001
																					P value summary	****
																					Significant diff. among means (P < 0.05)?	Yes
																					R squared	0.9466
																					ANOVA table	SS	DF	MS	F (DFn, DFd)	P value
																					Treatment (between columns)	16367	2	8184	F (2, 13) = 115.2	P<0.0001
																					Residual (within columns)	923.6	13	71.05
																					Total	17291	15
																					Data summary
																					Number of treatments (columns)	3
																					Number of values (total)	16
																					Tukey's multiple comparisons test	Mean Diff.	95.00% CI of diff.	Below threshold?	Summary	Adjusted P Value
																					CA2/3-Oligo-WT-Dens vs. CA2/3-Oligo-HET-Dens	-7.116	-21.19 to 6.960	No	ns	0.4018
																					CA2/3-Oligo-WT-Dens vs. CA2/3-Oligo-KO-Dens	62.25	48.77 to 75.73	Yes	****	<0.0001
																					CA2/3-Oligo-HET-Dens vs. CA2/3-Oligo-KO-Dens	69.37	55.89 to 82.84	Yes	****	<0.0001
																					Test details	Mean 1	Mean 2	Mean Diff.	SE of diff.	n1	n2	q	DF
																					CA2/3-Oligo-WT-Dens vs. CA2/3-Oligo-HET-Dens	70.51	77.63	-7.116	5.331	5	5	1.888	13
																					CA2/3-Oligo-WT-Dens vs. CA2/3-Oligo-KO-Dens	70.51	8.263	62.25	5.104	5	6	17.25	13
																					CA2/3-Oligo-HET-Dens vs. CA2/3-Oligo-KO-Dens	77.63	8.263	69.37	5.104	5	6	19.22	13

## Sheet: P30 Striatum NkxCre ANOVA+Tukey
	P30 Nkx2.1-Cre Striatum Statistics
	Tom+ cell Density-Striatum
	ANOVA summary
	F	0.3671
	P value	0.6997
	P value summary	ns
	Significant diff. among means (P < 0.05)?	No
	R squared	0.05346
	ANOVA table	SS	DF	MS	F (DFn, DFd)	P value
	Treatment (between columns)	283	2	141.5	F (2, 13) = 0.3671	P=0.6997
	Residual (within columns)	5011	13	385.4
	Total	5294	15
	Data summary
	Number of treatments (columns)	3
	Number of values (total)	16
	Tukey's multiple comparisons test	Mean Diff.	95.00% CI of diff.	Below threshold?	Summary	Adjusted P Value
	Stri-Tom-WT-Dens vs. Stri-Tom-HET-Dens	8.42	-24.37 to 41.21	No	ns	0.78
	Stri-Tom-WT-Dens vs. Stri-Tom-KO-Dens	9.521	-21.87 to 40.91	No	ns	0.709
	Stri-Tom-HET-Dens vs. Stri-Tom-KO-Dens	1.101	-30.29 to 32.49	No	ns	0.9953
	Test details	Mean 1	Mean 2	Mean Diff.	SE of diff.	n1	n2	q	DF
	Stri-Tom-WT-Dens vs. Stri-Tom-HET-Dens	141.8	133.4	8.42	12.42	5	5	0.959	13
	Stri-Tom-WT-Dens vs. Stri-Tom-KO-Dens	141.8	132.3	9.521	11.89	5	6	1.133	13
	Stri-Tom-HET-Dens vs. Stri-Tom-KO-Dens	133.4	132.3	1.101	11.89	5	6	0.131	13
	PV+ cell Density-Whole Cortex										% PV+ cell-Striatum
	ANOVA summary										ANOVA summary
	F	7.618									F	20.16
	P value	0.0065									P value	0.0001
	P value summary	**									P value summary	***
	Significant diff. among means (P < 0.05)?	Yes									Significant diff. among means (P < 0.05)?	Yes
	R squared	0.5396									R squared	0.7562
	ANOVA table	SS	DF	MS	F (DFn, DFd)	P value					ANOVA table	SS	DF	MS	F (DFn, DFd)	P value
	Treatment (between columns)	868	2	434	F (2, 13) = 7.618	P=0.0065					Treatment (between columns)	410.9	2	205.5	F (2, 13) = 20.16	P=0.0001
	Residual (within columns)	740.6	13	56.97							Residual (within columns)	132.5	13	10.19
	Total	1609	15								Total	543.4	15
	Data summary										Data summary
	Number of treatments (columns)	3									Number of treatments (columns)	3
	Number of values (total)	16									Number of values (total)	16
	Tukey's multiple comparisons test	Mean Diff.	95.00% CI of diff.	Below threshold?	Summary	Adjusted P Value					Tukey's multiple comparisons test	Mean Diff.	95.00% CI of diff.	Below threshold?	Summary	Adjusted P Value
	Stri-PV-WT-Dens vs. Stri-PV-HET-Dens	-2.76	-15.36 to 9.844	No	ns	0.8339					Stri-PV-WT-% vs. Stri-PV-HET-%	-3.202	-8.533 to 2.129	No	ns	0.2861
	Stri-PV-WT-Dens vs. Stri-PV-KO-Dens	13.67	1.598 to 25.73	Yes	*	0.0263					Stri-PV-WT-% vs. Stri-PV-KO-%	8.535	3.431 to 13.64	Yes	**	0.0019
	Stri-PV-HET-Dens vs. Stri-PV-KO-Dens	16.43	4.358 to 28.49	Yes	**	0.0085					Stri-PV-HET-% vs. Stri-PV-KO-%	11.74	6.633 to 16.84	Yes	***	0.0001
	Test details	Mean 1	Mean 2	Mean Diff.	SE of diff.	n1	n2	q	DF		Test details	Mean 1	Mean 2	Mean Diff.	SE of diff.	n1	n2	q	DF
	Stri-PV-WT-Dens vs. Stri-PV-HET-Dens	29.34	32.1	-2.76	4.774	5	5	0.8177	13		Stri-PV-WT-% vs. Stri-PV-HET-%	20.46	23.66	-3.202	2.019	5	5	2.243	13
	Stri-PV-WT-Dens vs. Stri-PV-KO-Dens	29.34	15.67	13.67	4.57	5	6	4.229	13		Stri-PV-WT-% vs. Stri-PV-KO-%	20.46	11.93	8.535	1.933	5	6	6.244	13
	Stri-PV-HET-Dens vs. Stri-PV-KO-Dens	32.1	15.67	16.43	4.57	5	6	5.083	13		Stri-PV-HET-% vs. Stri-PV-KO-%	23.66	11.93	11.74	1.933	5	6	8.587	13
	SST+ cell Density-Whole Cortex										% SST+ cell-Striatum
	ANOVA summary										ANOVA summary
	F	0.06305									F	0.7321
	P value	0.9392									P value	0.4997
	P value summary	ns									P value summary	ns
	Significant diff. among means (P < 0.05)?	No									Significant diff. among means (P < 0.05)?	No
	R squared	0.009607									R squared	0.1012
	ANOVA table	SS	DF	MS	F (DFn, DFd)	P value					ANOVA table	SS	DF	MS	F (DFn, DFd)	P value
	Treatment (between columns)	2.705	2	1.353	F (2, 13) = 0.06305	P=0.9392					Treatment (between columns)	8.086	2	4.043	F (2, 13) = 0.7321	P=0.4997
	Residual (within columns)	278.9	13	21.45							Residual (within columns)	71.79	13	5.522
	Total	281.6	15								Total	79.88	15
	Data summary										Data summary
	Number of treatments (columns)	3									Number of treatments (columns)	3
	Number of values (total)	16									Number of values (total)	16
	Tukey's multiple comparisons test	Mean Diff.	95.00% CI of diff.	Below threshold?	Summary	Adjusted P Value					Tukey's multiple comparisons test	Mean Diff.	95.00% CI of diff.	Below threshold?	Summary	Adjusted P Value
	Stri-SST-WT-Dens vs. Stri-SST-HET-Dens	0.378	-7.357 to 8.113	No	ns	0.9909					Stri-SST-WT-% vs. Stri-SST-HET-%	-0.806	-4.730 to 3.118	No	ns	0.8521
	Stri-SST-WT-Dens vs. Stri-SST-KO-Dens	-0.6023	-8.008 to 6.803	No	ns	0.9749					Stri-SST-WT-% vs. Stri-SST-KO-%	-1.716	-5.473 to 2.042	No	ns	0.4707
	Stri-SST-HET-Dens vs. Stri-SST-KO-Dens	-0.9803	-8.386 to 6.425	No	ns	0.9352					Stri-SST-HET-% vs. Stri-SST-KO-%	-0.9097	-4.667 to 2.848	No	ns	0.8015
	Test details	Mean 1	Mean 2	Mean Diff.	SE of diff.	n1	n2	q	DF		Test details	Mean 1	Mean 2	Mean Diff.	SE of diff.	n1	n2	q	DF
	Stri-SST-WT-Dens vs. Stri-SST-HET-Dens	22.22	21.84	0.378	2.929	5	5	0.1825	13		Stri-SST-WT-% vs. Stri-SST-HET-%	15.55	16.35	-0.806	1.486	5	5	0.7669	13
	Stri-SST-WT-Dens vs. Stri-SST-KO-Dens	22.22	22.82	-0.6023	2.805	5	6	0.3037	13		Stri-SST-WT-% vs. Stri-SST-KO-%	15.55	17.26	-1.716	1.423	5	6	1.705	13
	Stri-SST-HET-Dens vs. Stri-SST-KO-Dens	21.84	22.82	-0.9803	2.805	5	6	0.4943	13		Stri-SST-HET-% vs. Stri-SST-KO-%	16.35	17.26	-0.9097	1.423	5	6	0.9041	13

## Sheet: P30 Cortex DlxCre ANOVA+Tukey
	P30 Dlx5/6-Cre Cortex Statistics
	Tom+ cell Density-Whole Cortex
	ANOVA summary
	F	0.6157
	P value	0.5616
	P value summary	ns
	Significant diff. among means (P < 0.05)?	No
	R squared	0.1204
	ANOVA table	SS	DF	MS	F (DFn, DFd)	P value
	Treatment (between columns)	919.1	2	459.6	F (2, 9) = 0.6157	P=0.5616
	Residual (within columns)	6718	9	746.4
	Total	7637	11
	Data summary
	Number of treatments (columns)	3
	Number of values (total)	12
	Tukey's multiple comparisons test	Mean Diff.	95.00% CI of diff.	Below threshold?	Summary	Adjusted P Value
	DLX-CtxT-Tom-WT-Dens vs. DLX-CtxT-Tom-HET-Dens	-19.46	-77.72 to 38.80	No	ns	0.6345
	DLX-CtxT-Tom-WT-Dens vs. DLX-CtxT-Tom-KO-Dens	-17.96	-69.13 to 33.21	No	ns	0.6069
	DLX-CtxT-Tom-HET-Dens vs. DLX-CtxT-Tom-KO-Dens	1.505	-54.20 to 57.21	No	ns	0.9969
	Test details	Mean 1	Mean 2	Mean Diff.	SE of diff.	n1	n2	q	DF
	DLX-CtxT-Tom-WT-Dens vs. DLX-CtxT-Tom-HET-Dens	419.4	438.8	-19.46	20.87	4	3	1.319	9
	DLX-CtxT-Tom-WT-Dens vs. DLX-CtxT-Tom-KO-Dens	419.4	437.3	-17.96	18.33	4	5	1.386	9
	DLX-CtxT-Tom-HET-Dens vs. DLX-CtxT-Tom-KO-Dens	438.8	437.3	1.505	19.95	3	5	0.1067	9
	PV+ cell Density-Whole Cortex										% PV+ cell-Whole Cortex
	ANOVA summary										ANOVA summary
	F	0.476									F	0.2001
	P value	0.636									P value	0.8222
	P value summary	ns									P value summary	ns
	Significant diff. among means (P < 0.05)?	No									Significant diff. among means (P < 0.05)?	No
	R squared	0.09566									R squared	0.04257
	ANOVA table	SS	DF	MS	F (DFn, DFd)	P value					ANOVA table	SS	DF	MS	F (DFn, DFd)	P value
	Treatment (between columns)	113.4	2	56.7	F (2, 9) = 0.4760	P=0.6360					Treatment (between columns)	1.571	2	0.7855	F (2, 9) = 0.2001	P=0.8222
	Residual (within columns)	1072	9	119.1							Residual (within columns)	35.34	9	3.926
	Total	1185	11								Total	36.91	11
	Data summary										Data summary
	Number of treatments (columns)	3									Number of treatments (columns)	3
	Number of values (total)	12									Number of values (total)	12
	Tukey's multiple comparisons test	Mean Diff.	95.00% CI of diff.	Below threshold?	Summary	Adjusted P Value					Tukey's multiple comparisons test	Mean Diff.	95.00% CI of diff.	Below threshold?	Summary	Adjusted P Value
	DLX-CtxT-PV-WT-Dens vs. DLX-CtxT-PV-HET-Dens	-8.114	-31.39 to 15.16	No	ns	0.6106					DLX-CtxT-PV-WT-% vs. DLX-CtxT-PV-HET-%	-0.7025	-4.928 to 3.523	No	ns	0.8894
	DLX-CtxT-PV-WT-Dens vs. DLX-CtxT-PV-KO-Dens	-3.906	-24.35 to 16.54	No	ns	0.8572					DLX-CtxT-PV-WT-% vs. DLX-CtxT-PV-KO-%	0.1975	-3.514 to 3.909	No	ns	0.9879
	DLX-CtxT-PV-HET-Dens vs. DLX-CtxT-PV-KO-Dens	4.209	-18.04 to 26.46	No	ns	0.8598					DLX-CtxT-PV-HET-% vs. DLX-CtxT-PV-KO-%	0.9	-3.140 to 4.940	No	ns	0.8121
	Test details	Mean 1	Mean 2	Mean Diff.	SE of diff.	n1	n2	q	DF		Test details	Mean 1	Mean 2	Mean Diff.	SE of diff.	n1	n2	q	DF
	DLX-CtxT-PV-WT-Dens vs. DLX-CtxT-PV-HET-Dens	111.7	119.8	-8.114	8.336	4	3	1.377	9		DLX-CtxT-PV-WT-% vs. DLX-CtxT-PV-HET-%	26.82	27.52	-0.7025	1.513	4	3	0.6565	9
	DLX-CtxT-PV-WT-Dens vs. DLX-CtxT-PV-KO-Dens	111.7	115.6	-3.906	7.321	4	5	0.7544	9		DLX-CtxT-PV-WT-% vs. DLX-CtxT-PV-KO-%	26.82	26.62	0.1975	1.329	4	5	0.2101	9
	DLX-CtxT-PV-HET-Dens vs. DLX-CtxT-PV-KO-Dens	119.8	115.6	4.209	7.97	3	5	0.7468	9		DLX-CtxT-PV-HET-% vs. DLX-CtxT-PV-KO-%	27.52	26.62	0.9	1.447	3	5	0.8796	9
	SST+ cell Density-Whole Cortex										% SST+ cell-Whole Cortex
	ANOVA summary										ANOVA summary
	F	2.236									F	3.492
	P value	0.1628									P value	0.0754
	P value summary	ns									P value summary	ns
	Significant diff. among means (P < 0.05)?	No									Significant diff. among means (P < 0.05)?	No
	R squared	0.3319									R squared	0.4369
	ANOVA table	SS	DF	MS	F (DFn, DFd)	P value					ANOVA table	SS	DF	MS	F (DFn, DFd)	P value
	Treatment (between columns)	233.6	2	116.8	F (2, 9) = 2.236	P=0.1628					Treatment (between columns)	7.074	2	3.537	F (2, 9) = 3.492	P=0.0754
	Residual (within columns)	470.1	9	52.23							Residual (within columns)	9.116	9	1.013
	Total	703.7	11								Total	16.19	11
	Data summary										Data summary
	Number of treatments (columns)	3									Number of treatments (columns)	3
	Number of values (total)	12									Number of values (total)	12
	Tukey's multiple comparisons test	Mean Diff.	95.00% CI of diff.	Below threshold?	Summary	Adjusted P Value					Tukey's multiple comparisons test	Mean Diff.	95.00% CI of diff.	Below threshold?	Summary	Adjusted P Value
	DLX-CtxT-SST-WT-Dens vs. DLX-CtxT-SST-HET-Dens	-6.906	-22.32 to 8.505	No	ns	0.4552					DLX-CtxT-SST-WT-% vs. DLX-CtxT-SST-HET-%	-0.7325	-2.879 to 1.414	No	ns	0.6226
	DLX-CtxT-SST-WT-Dens vs. DLX-CtxT-SST-KO-Dens	-10.17	-23.71 to 3.361	No	ns	0.145					DLX-CtxT-SST-WT-% vs. DLX-CtxT-SST-KO-%	-1.767	-3.651 to 0.1185	No	ns	0.0657
	DLX-CtxT-SST-HET-Dens vs. DLX-CtxT-SST-KO-Dens	-3.269	-18.00 to 11.47	No	ns	0.8135					DLX-CtxT-SST-HET-% vs. DLX-CtxT-SST-KO-%	-1.034	-3.086 to 1.018	No	ns	0.3778
	Test details	Mean 1	Mean 2	Mean Diff.	SE of diff.	n1	n2	q	DF		Test details	Mean 1	Mean 2	Mean Diff.	SE of diff.	n1	n2	q	DF
	DLX-CtxT-SST-WT-Dens vs. DLX-CtxT-SST-HET-Dens	75.99	82.89	-6.906	5.52	4	3	1.769	9		DLX-CtxT-SST-WT-% vs. DLX-CtxT-SST-HET-%	18.14	18.87	-0.7325	0.7687	4	3	1.348	9
	DLX-CtxT-SST-WT-Dens vs. DLX-CtxT-SST-KO-Dens	75.99	86.16	-10.17	4.848	4	5	2.968	9		DLX-CtxT-SST-WT-% vs. DLX-CtxT-SST-KO-%	18.14	19.9	-1.767	0.6751	4	5	3.7	9
	DLX-CtxT-SST-HET-Dens vs. DLX-CtxT-SST-KO-Dens	82.89	86.16	-3.269	5.278	3	5	0.8758	9		DLX-CtxT-SST-HET-% vs. DLX-CtxT-SST-KO-%	18.87	19.9	-1.034	0.735	3	5	1.99	9

## Sheet: P5 Cortex NkxCre t-test
	P5 Nkx2.1-Cre Cortex Statistics
	Whole Cortex			Superficial Cortex			Deep Cortex
	WT-P5 vs. KO-P5			WT-P5 vs. KO-P5			WT-P5 vs. KO-P5
	Unpaired t test			Unpaired t test			Unpaired t test
	P value	0.0095		P value	0.0007		P value	0.0659
	P value summary	**		P value summary	***		P value summary	ns
	Significantly different (P < 0.05)?	Yes		Significantly different (P < 0.05)?	Yes		Significantly different (P < 0.05)?	No
	One- or two-tailed P value?	Two-tailed		One- or two-tailed P value?	Two-tailed		One- or two-tailed P value?	Two-tailed
	t, df	t=3.755, df=6		t, df	t=6.407, df=6		t, df	t=2.245, df=6
	How big is the difference?			How big is the difference?			How big is the difference?
	Mean of column A	585.1		Mean of column A	551.5		Mean of column A	611.3
	Mean of column B	415		Mean of column B	354.6		Mean of column B	464.1
	Difference between means (B - A) ± SEM	-170.0 ± 45.28		Difference between means (B - A) ± SEM	-196.8 ± 30.72		Difference between means (B - A) ± SEM	-147.2 ± 65.56
	95% confidence interval	-280.8 to -59.24		95% confidence interval	-272.0 to -121.7		95% confidence interval	-307.6 to 13.22
	R squared (eta squared)	0.7015		R squared (eta squared)	0.8725		R squared (eta squared)	0.4566
	F test to compare variances			F test to compare variances			F test to compare variances
	F, DFn, Dfd	2.090, 3, 3		F, DFn, Dfd	3.630, 3, 3		F, DFn, Dfd	5.712, 3, 3
	P value	0.5605		P value	0.3178		P value	0.1863
	P value summary	ns		P value summary	ns		P value summary	ns
	Significantly different (P < 0.05)?	No		Significantly different (P < 0.05)?	No		Significantly different (P < 0.05)?	No
	Data analyzed			Data analyzed			Data analyzed
	Sample size, column A	4		Sample size, column A	4		Sample size, column A	4
	Sample size, column B	4		Sample size, column B	4		Sample size, column B	4
