# Supplementary material for: Loss of Ezh2 in the medial ganglionic eminence alters interneuron fate, cell morphology and gene expression profiles
Source: Front Cell Neurosci. 2024 Feb 14;18:1334244. doi: 10.3389/fncel.2024.1334244 (PMC10899338; doi:10.3389/fncel.2024.1334244)
Supplement: Supplementary file 3 [file Table_1.xlsx]

## Sheet: Sheet1
gene	p_val	avg_log2FC	pct.1	pct.2	p_val_adj
Meg3	7.54465e-271	-2.0656	0.095	0.862	1.7493e-266
Rian	5.20444e-160	-1.27473	0.082	0.652	1.2067e-155
Gm42418	9.16735e-123	-0.824249	1	1	2.12554e-118
B830012L14Rik	2.58904e-70	-0.645045	0.022	0.326	6.00294e-66
Hexb	1.67872e-56	-0.688265	0.491	0.759	3.89228e-52
Hsp90ab1	1.46779e-49	0.448066	0.995	0.96	3.40321e-45
Cmss1	6.077e-46	-0.582878	0.897	0.962	1.40901e-41
Lars2	2.82814e-42	-0.736537	0.597	0.813	6.55733e-38
Mirg	6.12204e-42	-0.308426	0.011	0.202	1.41946e-37
Tubb2b	2.769e-40	0.461369	0.863	0.76	6.4202e-36
Tubb5	2.1514e-39	0.431395	0.908	0.783	4.98823e-35
Tuba1a	3.55572e-37	0.431028	0.985	0.937	8.24429e-33
Gm26917	5.19207e-33	-0.519474	0.622	0.8	1.20383e-28
Actb	1.36404e-32	0.366697	0.99	0.963	3.16267e-28
Hsp90aa1	1.54977e-29	0.341652	0.923	0.817	3.5933e-25
AY036118	4.55599e-29	-0.334252	1	1	1.05635e-24
Actg1	6.42568e-29	0.386421	0.888	0.79	1.48986e-24
Camk1d	2.26274e-28	-0.418447	0.967	0.99	5.2464e-24
Eef1a1	9.0513e-28	0.332471	0.989	0.924	2.09863e-23
Ptma	9.1727e-24	0.309444	0.974	0.922	2.12678e-19
Hspa8	3.99803e-22	0.318143	0.8	0.662	9.26983e-18
Sox11	3.035e-21	0.239494	1	0.998	7.03694e-17
Hnrnpa0	4.64139e-21	0.294542	0.607	0.413	1.07615e-16
Slc15a2	2.25911e-20	0.175799	0.157	0.042	5.23796e-16
Dlk1	3.36034e-20	0.393818	0.345	0.179	7.79129e-16
Nr6a1	6.75147e-20	-0.393318	0.505	0.673	1.5654e-15
Gm42047	1.13196e-19	0.310471	0.36	0.188	2.62456e-15
Rps8	3.33851e-19	0.290012	0.944	0.867	7.74067e-15
Fau	2.83474e-18	0.287216	0.835	0.744	6.57263e-14
Celf4	5.1995e-18	-0.323467	0.928	0.963	1.20556e-13
Tpt1	1.04938e-17	0.263384	0.906	0.829	2.4331e-13
Stmn1	1.55737e-17	0.260141	0.926	0.862	3.61091e-13
Maged1	8.6783e-17	0.282489	0.573	0.418	2.01215e-12
Rpl9	3.84004e-16	0.280093	0.642	0.502	8.90353e-12
Atxn7l3b	7.38083e-16	0.26244	0.718	0.576	1.71132e-11
Hnrnpa1	7.66479e-16	0.244371	0.788	0.668	1.77716e-11
Rpl11	8.30153e-16	0.266426	0.782	0.67	1.92479e-11
Rps14	1.27163e-15	0.231645	0.85	0.757	2.9484e-11
Rpl7	3.13791e-15	0.253736	0.637	0.484	7.27557e-11
Set	3.47999e-15	0.233478	0.822	0.698	8.06871e-11
Map1b	3.60997e-15	0.213402	0.998	0.991	8.37007e-11
AC149090.1	3.93863e-15	-0.276161	0.184	0.323	9.13212e-11
Tmsb4x	5.57722e-15	0.272899	0.884	0.822	1.29313e-10
Rpl27a	6.65578e-15	0.255841	0.754	0.637	1.54321e-10
Ndufa13	2.43123e-14	0.184168	0.275	0.144	5.63705e-10
Rps23	3.64329e-14	0.254374	0.791	0.693	8.44734e-10
Rpl13	3.99259e-14	0.246137	0.933	0.865	9.25722e-10
Rpl18a	1.14685e-13	0.262615	0.815	0.718	2.65909e-09
Ube3a	1.36495e-13	0.20138	0.881	0.786	3.16478e-09
Hist1h1e	1.55545e-13	0.245369	0.418	0.275	3.60647e-09
Marcks	2.31245e-13	0.204278	0.986	0.962	5.36166e-09
Psmb4	2.70579e-13	0.17801	0.263	0.14	6.27365e-09
Eef2	2.89565e-13	0.247971	0.724	0.61	6.71386e-09
Rpl5	2.93082e-13	0.258771	0.692	0.58	6.79541e-09
Cfl1	4.15001e-13	0.217278	0.704	0.595	9.62222e-09
Gnb2	6.19867e-13	0.192083	0.401	0.256	1.43722e-08
Hspa5	7.48315e-13	0.233105	0.428	0.288	1.73504e-08
Ubb	9.79283e-13	0.217919	0.529	0.38	2.27057e-08
Hist3h2ba	1.16186e-12	0.198711	0.409	0.267	2.6939e-08
Chchd2	1.52612e-12	0.206581	0.49	0.343	3.53846e-08
Gapdh	2.0553e-12	0.233052	0.622	0.499	4.76541e-08
Top2b	2.36195e-12	0.199752	0.958	0.906	5.47642e-08
Nes	3.53641e-12	0.24001	0.397	0.26	8.19952e-08
Lcorl	3.56983e-12	0.247005	0.904	0.825	8.27701e-08
Ubqln2	4.53387e-12	0.169009	0.421	0.272	1.05122e-07
Rpl18	8.66115e-12	0.23052	0.732	0.643	2.00817e-07
Hnrnpu	1.00873e-11	0.204604	0.92	0.846	2.33884e-07
Carhsp1	1.36497e-11	0.171192	0.284	0.166	3.16481e-07
Rpl29	1.47436e-11	0.229097	0.676	0.563	3.41844e-07
Trim8	1.54957e-11	0.189772	0.366	0.236	3.59282e-07
Rpl13a	1.66208e-11	0.207737	0.896	0.824	3.85369e-07
Basp1	1.71526e-11	0.216203	0.959	0.934	3.977e-07
Nnat	1.78208e-11	0.226774	1	0.998	4.13192e-07
Edil3	2.09316e-11	0.560779	0.693	0.607	4.8532e-07
Ppp1r14b	3.28691e-11	0.203989	0.487	0.356	7.62103e-07
Atp5j	3.92866e-11	0.186733	0.317	0.198	9.10898e-07
Nedd4	3.94365e-11	0.180985	0.99	0.979	9.14376e-07
Tuba1b	6.16415e-11	0.158884	0.341	0.212	1.42922e-06
Atp5b	6.81192e-11	0.185556	0.449	0.316	1.57941e-06
Rps15	7.00431e-11	0.22371	0.841	0.779	1.62402e-06
Marcksl1	7.31553e-11	0.200623	0.725	0.617	1.69618e-06
Rnf5	7.31649e-11	0.116411	0.126	0.049	1.6964e-06
Npm1	8.68745e-11	0.248663	0.606	0.511	2.01427e-06
Rpl3	1.51364e-10	0.225332	0.536	0.413	3.50952e-06
Snrpf	1.60789e-10	0.142895	0.262	0.151	3.72805e-06
Dnaja1	2.18719e-10	0.212611	0.619	0.505	5.07122e-06
H3f3b	2.22298e-10	0.202014	0.834	0.765	5.15421e-06
Cox4i1	2.42537e-10	0.204065	0.531	0.404	5.62347e-06
Rpl14	2.60247e-10	0.194378	0.665	0.556	6.03408e-06
Pkm	2.60767e-10	0.215393	0.627	0.521	6.04615e-06
Ppm1e	3.97676e-10	-0.231382	0.763	0.853	9.22051e-06
Crabp2	4.0503e-10	0.148392	0.268	0.159	9.39102e-06
Cox6a1	4.12036e-10	0.15659	0.323	0.205	9.55346e-06
Sp9	4.12528e-10	0.213559	0.544	0.42	9.56488e-06
Amer2	4.20745e-10	0.169828	0.378	0.256	9.7554e-06
Eif3c	4.3863e-10	0.178352	0.506	0.378	1.01701e-05
Paics	4.71956e-10	0.157816	0.231	0.13	1.09428e-05
Cacna1d	4.88573e-10	-0.149935	0.065	0.15	1.1328e-05
Tubb4a	5.33309e-10	0.161148	0.262	0.156	1.23653e-05
Chd4	5.68458e-10	0.193226	0.943	0.898	1.31803e-05
Rmst	5.8009e-10	-0.56786	0.478	0.58	1.345e-05
Rpsa	6.03932e-10	0.186524	0.959	0.929	1.40028e-05
2900097C17Rik	6.17663e-10	0.167019	0.394	0.273	1.43211e-05
Rpl4	6.31582e-10	0.186303	0.559	0.438	1.46439e-05
tdTomato	6.36829e-10	0.170637	0.353	0.237	1.47655e-05
Meis1	6.51117e-10	-0.283102	0.563	0.681	1.50968e-05
Mageh1	7.2778e-10	0.0998948	0.132	0.056	1.68743e-05
Ftl1	9.16445e-10	0.217978	0.804	0.711	2.12487e-05
Hspd1	9.18913e-10	0.174	0.386	0.266	2.13059e-05
Eif2s3x	9.21581e-10	0.154937	0.358	0.237	2.13678e-05
Igf2bp1	9.34905e-10	0.223553	0.665	0.578	2.16767e-05
Eef1g	9.51197e-10	0.198932	0.583	0.466	2.20544e-05
Phactr1	1.10718e-09	-0.310349	0.589	0.694	2.5671e-05
Serbp1	1.11599e-09	0.179574	0.827	0.765	2.58753e-05
Rps11	1.33587e-09	0.193062	0.797	0.719	3.09735e-05
Dscaml1	1.43475e-09	-0.325627	0.479	0.594	3.3266e-05
Sbk1	1.53665e-09	0.182683	0.542	0.421	3.56288e-05
Dlx2	1.55393e-09	0.169405	0.389	0.267	3.60294e-05
Rpl24	1.60979e-09	0.193627	0.704	0.622	3.73247e-05
Rpl27	1.71436e-09	0.172522	0.578	0.457	3.97492e-05
Dusp8	2.30991e-09	0.157989	0.228	0.133	5.35576e-05
Hmgb3	2.35122e-09	0.152738	0.437	0.311	5.45153e-05
Ywhaz	2.39135e-09	0.167364	0.774	0.704	5.54458e-05
Rpl23	2.39782e-09	0.191708	0.726	0.634	5.55958e-05
Snrnp70	2.55483e-09	-0.1891	0.729	0.824	5.92364e-05
Dlx6os1	2.84233e-09	-0.256623	0.975	0.973	6.59022e-05
Txn1	3.03979e-09	0.133432	0.241	0.141	7.04805e-05
Kmt5a	3.13819e-09	0.144218	0.269	0.166	7.27621e-05
mt-Cytb	3.66873e-09	-0.246813	1	1	8.50632e-05
Cst3	3.86714e-09	0.112095	0.173	0.088	8.96635e-05
Smarca4	3.91487e-09	0.17687	0.91	0.883	9.07701e-05
Ppib	4.08534e-09	0.124047	0.239	0.14	9.47228e-05
Pabpc1	4.64044e-09	0.216653	0.643	0.55	0.000107593
Rps3	4.80606e-09	0.192474	0.598	0.491	0.000111433
Ckb	4.97178e-09	0.194237	0.657	0.566	0.000115276
Ube2m	5.08294e-09	0.140323	0.239	0.143	0.000117853
Rpl15	5.30187e-09	0.214519	0.638	0.527	0.000122929
Ctbp1	6.10559e-09	0.15757	0.415	0.298	0.000141564
Psma4	6.16649e-09	0.137932	0.262	0.162	0.000142976
Mdh2	6.52301e-09	0.139125	0.284	0.18	0.000151243
6330403K07Rik	7.64952e-09	0.167509	0.391	0.279	0.000177362
Cd24a	7.76126e-09	0.191618	0.504	0.396	0.000179953
Pou3f4	8.67066e-09	0.193465	0.462	0.344	0.000201038
Cdh2	8.73504e-09	0.172665	0.991	0.967	0.000202531
Tubb3	1.19453e-08	0.165657	0.873	0.832	0.000276964
Brd3	1.23313e-08	0.17281	0.611	0.504	0.000285914
Aldoa	1.26957e-08	0.117332	0.162	0.083	0.000294363
Rab6a	1.33616e-08	0.170324	0.49	0.377	0.000309802
Rps18	1.4087e-08	0.190991	0.619	0.519	0.000326621
Dock4	1.51446e-08	-0.273907	0.712	0.77	0.000351142
Rpl21	1.52798e-08	0.170486	0.675	0.592	0.000354277
Arf5	1.64418e-08	0.142116	0.257	0.161	0.000381219
Eno1	1.73331e-08	0.105589	0.147	0.073	0.000401885
Slc25a4	1.75401e-08	0.147522	0.397	0.282	0.000406684
Shisa9	1.88562e-08	-0.397331	0.067	0.141	0.0004372
Psmb6	1.92415e-08	0.132724	0.25	0.154	0.000446134
Zfp518b	2.01592e-08	0.129946	0.272	0.173	0.000467411
Cdk5r1	2.14911e-08	0.167757	0.559	0.437	0.000498292
Eef1b2	2.15508e-08	0.171393	0.444	0.333	0.000499678
Bex2	2.15834e-08	0.141962	0.239	0.147	0.000500432
Cct2	2.4026e-08	0.147273	0.387	0.277	0.000557067
Hmgb1	2.43218e-08	0.184187	0.761	0.694	0.000563924
Sar1a	2.55726e-08	0.109161	0.217	0.126	0.000592926
Npc2	2.81376e-08	0.147304	0.315	0.211	0.000652398
Eif4g2	2.82313e-08	0.166219	0.895	0.836	0.000654571
Rpl10a	2.8968e-08	0.188635	0.56	0.456	0.000671653
Ndufb9	2.99728e-08	0.124159	0.255	0.158	0.000694949
Tug1	3.05884e-08	0.154152	0.388	0.277	0.000709222
Cox5a	3.09113e-08	0.136413	0.283	0.183	0.000716708
Bnip3l	3.17094e-08	0.13371	0.354	0.244	0.000735215
Gm27032	3.33734e-08	0.12101	0.205	0.119	0.000773797
Grin2b	3.47071e-08	-0.257403	0.096	0.177	0.000804718
Gnas	3.58865e-08	0.167584	0.888	0.821	0.000832064
Rps2	3.60782e-08	0.149874	0.747	0.664	0.00083651
Serf2	3.68403e-08	0.168864	0.389	0.282	0.000854179
Kalrn	3.73066e-08	-0.145751	0.989	0.983	0.000864991
Rpl26	3.88303e-08	0.194411	0.701	0.625	0.00090032
Dpysl3	4.0469e-08	0.180387	0.922	0.882	0.000938314
Rpl17	4.22243e-08	0.160366	0.77	0.679	0.000979013
Hmgn5	4.29139e-08	0.126927	0.184	0.103	0.000995002
Rpl37	4.51103e-08	0.195523	0.605	0.515	0.00104593
Prrc2a	4.59733e-08	0.15317	0.528	0.407	0.00106594
Arl6ip1	4.78615e-08	0.173284	0.428	0.32	0.00110972
Calm1	4.83596e-08	0.174301	0.661	0.579	0.00112127
Maz	4.95949e-08	0.14058	0.295	0.196	0.00114991
Tenm2	5.02361e-08	-0.355056	0.775	0.82	0.00116477
Chtop	5.22769e-08	0.139437	0.318	0.216	0.00121209
Cwc15	6.69705e-08	0.111621	0.222	0.133	0.00155278
Rpl19	7.18886e-08	0.17008	0.723	0.66	0.00166681
Lrrc8a	7.66321e-08	0.106412	0.204	0.119	0.00177679
Cited2	7.71766e-08	0.132312	0.223	0.136	0.00178942
Pcbp4	7.72981e-08	0.144242	0.349	0.244	0.00179223
Rps19	7.76275e-08	0.161825	0.8	0.732	0.00179987
Gsk3b	9.3623e-08	0.143144	0.983	0.971	0.00217074
Nbea	9.44344e-08	-0.194252	0.988	0.99	0.00218956
Rpl8	1.01444e-07	0.182607	0.715	0.654	0.00235208
Nav1	1.03159e-07	-0.20341	0.806	0.867	0.00239184
Rpl37a	1.04569e-07	0.177278	0.705	0.625	0.00242454
Gm15564	1.13432e-07	-0.17107	0.138	0.225	0.00263004
Atp5h	1.15037e-07	0.128249	0.331	0.227	0.00266726
Rnf187	1.21206e-07	0.136553	0.341	0.238	0.00281029
Scd2	1.36544e-07	0.175908	0.784	0.729	0.0031659
Eid1	1.37647e-07	0.163901	0.515	0.398	0.00319148
Ppdpf	1.38532e-07	0.157195	0.315	0.22	0.003212
Calr	1.39246e-07	0.150308	0.376	0.271	0.00322855
Limd2	1.47594e-07	0.0932403	0.155	0.083	0.00342212
Chst2	1.48104e-07	0.110873	0.144	0.075	0.00343393
Ndufs2	1.51481e-07	0.120531	0.216	0.132	0.00351224
Top1	1.84326e-07	0.146672	0.941	0.924	0.00427378
Hist3h2a	1.85441e-07	0.0910183	0.13	0.065	0.00429964
Tubb2a	1.87809e-07	0.108788	0.13	0.066	0.00435454
Atp5o	1.89305e-07	0.117708	0.317	0.216	0.00438923
Fscn1	1.90329e-07	0.159157	0.52	0.421	0.00441296
Gm16351	1.99196e-07	0.0814089	0.118	0.056	0.00461857
Rpl28	2.05344e-07	0.170724	0.703	0.628	0.00476111
Gm48099	2.14702e-07	-0.0959256	0.051	0.114	0.00497807
Grcc10	2.1934e-07	0.126405	0.287	0.193	0.00508563
Zfp41	2.22188e-07	0.137109	0.315	0.22	0.00515164
Erp29	2.27575e-07	0.113129	0.259	0.167	0.00527656
Timm13	2.43508e-07	0.117914	0.23	0.144	0.00564597
Eif4a1	2.51382e-07	0.147008	0.608	0.502	0.00582854
Rpl39	2.62569e-07	0.148264	0.502	0.39	0.00608792
Sox4	2.73541e-07	0.170477	0.97	0.963	0.00634232
Ran	2.73684e-07	0.152326	0.419	0.319	0.00634565
Gng3	2.86269e-07	0.103849	0.187	0.11	0.00663744
Klhl9	2.87353e-07	0.130837	0.308	0.212	0.00666257
Ndufb3	2.8806e-07	0.110985	0.188	0.11	0.00667895
Eif2s2	2.91653e-07	0.16457	0.455	0.354	0.00676226
Jund	3.07379e-07	0.123779	0.332	0.233	0.00712689
Cct8	3.14082e-07	0.124419	0.302	0.207	0.00728231
Polr2m	3.21429e-07	0.126219	0.302	0.207	0.00745265
Tsix	3.29637e-07	0.144421	0.432	0.327	0.00764296
Prdx2	3.42128e-07	0.165809	0.678	0.602	0.00793259
Hspa9	3.52107e-07	0.133346	0.301	0.206	0.00816395
Mrpl21	3.61531e-07	0.0967194	0.185	0.107	0.00838246
Ndufb8	3.71558e-07	0.106661	0.189	0.112	0.00861495
Rprm	4.04299e-07	0.0868603	0.104	0.048	0.00937407
Psmd2	4.10681e-07	0.116899	0.285	0.192	0.00952205
Dda1	4.13133e-07	0.092691	0.153	0.083	0.00957891
Rrm1	4.28815e-07	0.140155	0.278	0.187	0.00994251
Taco1	4.32711e-07	-0.154298	0.293	0.396	0.0100328
mt-Nd3	4.34423e-07	-0.215711	0.996	0.99	0.0100725
Pom121	4.4017e-07	0.123824	0.29	0.198	0.0102058
Syt11	4.49632e-07	0.152423	0.745	0.665	0.0104252
Rbis	4.66121e-07	0.111502	0.189	0.113	0.0108075
Pebp1	4.66619e-07	0.15091	0.411	0.317	0.010819
Ywhab	4.68753e-07	0.135233	0.491	0.378	0.0108685
Scand1	4.72894e-07	0.102098	0.246	0.156	0.0109645
Golgb1	4.73455e-07	0.130209	0.431	0.327	0.0109775
Yeats4	4.7635e-07	0.115953	0.233	0.149	0.0110447
Rad21	4.9026e-07	0.15562	0.402	0.302	0.0113672
Sept7	4.91742e-07	0.159772	0.619	0.525	0.0114015
Tubb4b	5.16286e-07	0.103227	0.146	0.079	0.0119706
Tagln3	5.23483e-07	0.11854	0.307	0.212	0.0121375
Scn8a	5.80048e-07	-0.161652	0.363	0.468	0.013449
Ranbp1	5.80471e-07	0.149568	0.384	0.285	0.0134588
Glrx5	5.87011e-07	0.084434	0.123	0.062	0.0136104
Gm38505	6.10854e-07	0.103725	0.13	0.067	0.0141633
Cox6c	6.18018e-07	0.13553	0.298	0.207	0.0143294
Rps10	6.30928e-07	0.1608	0.767	0.705	0.0146287
Maf	6.39416e-07	0.120626	0.173	0.1	0.0148255
Rpl36al	6.41745e-07	0.122005	0.241	0.158	0.0148795
Vim	6.4424e-07	0.186949	0.531	0.45	0.0149373
Ik	6.46644e-07	0.119947	0.319	0.223	0.0149931
Ppp2r1a	6.70733e-07	0.125371	0.276	0.187	0.0155516
Txnl4a	6.73307e-07	0.0896372	0.141	0.075	0.0156113
Smdt1	6.80759e-07	0.112633	0.212	0.132	0.0157841
Tmbim6	7.07958e-07	0.114208	0.24	0.156	0.0164147
Nras	7.20324e-07	0.134824	0.427	0.32	0.0167014
Foxg1	7.2839e-07	0.160628	0.646	0.566	0.0168885
Hint1	7.3763e-07	0.119816	0.359	0.26	0.0171027
Vdac1	7.47019e-07	0.0954196	0.255	0.166	0.0173204
Calm3	7.56954e-07	0.132589	0.353	0.255	0.0175507
Rpl36a	7.79844e-07	0.121961	0.37	0.272	0.0180815
Rpl6	7.86778e-07	0.159739	0.79	0.751	0.0182422
Zfp827	7.95887e-07	-0.185	0.501	0.58	0.0184534
Cox7a2	8.13423e-07	0.110912	0.264	0.175	0.01886
Rexo1	8.17157e-07	0.111864	0.22	0.14	0.0189466
Oip5os1	8.62788e-07	0.152256	0.412	0.317	0.0200046
Rps5	8.69434e-07	0.147996	0.673	0.573	0.0201587
Rps17	9.17818e-07	0.182835	0.588	0.496	0.0212805
Tax1bp1	9.33497e-07	0.122992	0.464	0.356	0.0216441
Dync1h1	9.43416e-07	0.174153	0.745	0.69	0.021874
Cct7	9.46209e-07	0.131383	0.334	0.242	0.0219388
Rap2b	1.02923e-06	0.09438	0.185	0.11	0.0238637
Sox12	1.04382e-06	0.157039	0.471	0.38	0.0242019
Dgki	1.0625e-06	-0.186964	0.516	0.617	0.0246352
Cct6a	1.10386e-06	0.133424	0.423	0.321	0.025594
B3gnt5	1.13127e-06	0.116588	0.311	0.218	0.0262297
Pafah1b3	1.16592e-06	0.114865	0.247	0.163	0.0270329
Dnajc9	1.16706e-06	0.101926	0.152	0.086	0.0270595
Slc32a1	1.20855e-06	0.119556	0.275	0.188	0.0280215
Pfn2	1.24866e-06	0.124987	0.428	0.323	0.0289513
Nsg1	1.26662e-06	0.135647	0.409	0.313	0.0293677
Psmc3	1.28869e-06	0.111331	0.223	0.144	0.0298795
Ndufb7	1.30465e-06	0.118275	0.263	0.177	0.0302496
Aff3	1.3285e-06	-0.24124	0.605	0.703	0.0308027
Cox5b	1.33063e-06	0.103443	0.214	0.135	0.030852
Maged2	1.34928e-06	0.0759884	0.109	0.053	0.0312844
Cdv3	1.35713e-06	0.164152	0.389	0.3	0.0314663
Pcdh9	1.36248e-06	0.28665	0.851	0.797	0.0315905
Fxyd6	1.40482e-06	0.118232	0.239	0.158	0.0325722
Stmn4	1.42438e-06	0.145863	0.265	0.183	0.0330256
Pde4d	1.43253e-06	-0.203135	0.887	0.925	0.0332147
Selenok	1.50572e-06	0.112407	0.205	0.129	0.0349115
Zfas1	1.51487e-06	0.112465	0.192	0.119	0.0351238
Banf1	1.52053e-06	0.0891876	0.161	0.093	0.035255
Oaz1	1.53144e-06	0.144038	0.4	0.306	0.0355079
Ubl5	1.54044e-06	0.108376	0.233	0.152	0.0357167
Tfrc	1.56874e-06	0.121629	0.247	0.164	0.0363728
H3f3a	1.61773e-06	0.181068	0.871	0.853	0.0375086
Pfn1	1.62938e-06	0.11015	0.286	0.198	0.0377788
Rpl31	1.68003e-06	0.145877	0.576	0.479	0.0389532
Ptov1	1.68902e-06	0.13399	0.409	0.311	0.0391617
Tmem47	1.70061e-06	0.175636	0.45	0.356	0.0394304
Rack1	1.73953e-06	0.158948	0.634	0.555	0.0403327
Arhgdia	1.74766e-06	0.127386	0.266	0.183	0.0405212
Pcbp1	1.77041e-06	0.111653	0.308	0.217	0.0410488
Ssrp1	1.78326e-06	0.112891	0.285	0.198	0.0413468
Blmh	1.82478e-06	0.133226	0.339	0.248	0.0423094
Tma7	1.83851e-06	0.129148	0.341	0.249	0.0426276
Kmt2e	1.83996e-06	0.142626	0.949	0.918	0.0426612
Tub	1.86496e-06	0.0920163	0.212	0.133	0.043241
Atmin	1.93886e-06	0.0723086	0.105	0.051	0.0449545
Copb2	1.96899e-06	0.107637	0.246	0.163	0.045653
Tomm22	1.99153e-06	0.0875989	0.163	0.095	0.0461756
Psmb1	2.07003e-06	0.131274	0.327	0.237	0.0479958
Snrpg	2.10559e-06	0.123366	0.328	0.237	0.0488201
Zfp428	2.12378e-06	0.0972327	0.244	0.16	0.0492421
Rps25	2.1481e-06	0.142082	0.566	0.467	0.0498059
Incenp	2.18331e-06	0.0962304	0.161	0.094	0.0506222
Dynlrb1	2.18754e-06	0.1341	0.293	0.209	0.0507202
Aplp1	2.28955e-06	0.134605	0.291	0.208	0.0530855
Ybx1	2.36021e-06	0.146457	0.774	0.71	0.0547238
Llgl1	2.37425e-06	0.103073	0.179	0.11	0.0550494
Emc1	2.3852e-06	0.0749642	0.1	0.048	0.0553033
Fasn	2.4612e-06	0.105645	0.182	0.111	0.0570653
Pcsk1n	2.4794e-06	0.0925334	0.128	0.069	0.0574874
Hist1h1c	2.51798e-06	0.0885807	0.135	0.074	0.058382
Gpx4	2.52007e-06	0.0960233	0.261	0.175	0.0584304
Ppp1r15b	2.52857e-06	0.106915	0.147	0.085	0.0586274
Dlx1as	2.53793e-06	0.185987	0.66	0.584	0.0588445
Ndufa4	2.54129e-06	0.131413	0.294	0.21	0.0589223
Smarca5	2.58371e-06	0.146623	0.763	0.702	0.059906
Psip1	2.64334e-06	0.127023	0.774	0.698	0.0612885
F2r	2.64805e-06	0.0854485	0.151	0.086	0.0613978
Exoc3	2.67267e-06	0.130696	0.433	0.336	0.0619686
P4ha1	2.69521e-06	0.12008	0.24	0.16	0.0624912
Ube2v1	2.70494e-06	0.101713	0.267	0.182	0.0627167
Nudc	2.72377e-06	0.0977646	0.214	0.137	0.0631533
Pea15a	2.89746e-06	0.113003	0.179	0.11	0.0671805
Rnasek	2.98039e-06	0.0750266	0.111	0.056	0.0691033
Bag6	2.98566e-06	0.103136	0.267	0.183	0.0692256
Spcs2	3.05362e-06	0.120632	0.28	0.196	0.0708013
Islr2	3.22847e-06	0.159211	0.281	0.199	0.0748554
Ccni	3.30567e-06	0.136941	0.524	0.429	0.0766452
Pgrmc1	3.39508e-06	0.109682	0.363	0.267	0.0787184
Atp6v1a	3.44421e-06	0.125023	0.389	0.295	0.0798574
Fam155a	3.6536e-06	-0.235072	0.823	0.86	0.0847125
2700081O15Rik	3.76591e-06	0.129225	0.479	0.383	0.0873164
Mafb	3.85141e-06	0.114268	0.178	0.11	0.0892989
Satb1	3.88279e-06	0.179296	0.501	0.412	0.0900264
Cnbp	4.03418e-06	0.130806	0.313	0.228	0.0935364
Btaf1	4.07324e-06	0.169421	0.788	0.745	0.0944422
Myl6	4.11257e-06	0.112522	0.311	0.221	0.095354
Pik3r3	4.30246e-06	-0.160517	0.941	0.966	0.0997569
Tpr	4.33693e-06	0.136425	0.668	0.595	0.100556
Oxct1	4.37321e-06	0.14627	0.404	0.313	0.101397
Ctsd	4.40576e-06	0.0832225	0.134	0.074	0.102152
Eif5a	4.40675e-06	0.128664	0.322	0.237	0.102175
Ppp1ca	4.4628e-06	0.0974238	0.265	0.181	0.103475
Zmat2	4.48392e-06	0.106225	0.287	0.203	0.103964
Skp1a	4.51848e-06	0.123989	0.345	0.256	0.104765
Eif1	4.59161e-06	0.127674	0.451	0.358	0.106461
Rbmxl1	4.5943e-06	0.0872507	0.152	0.088	0.106523
Tro	4.70878e-06	0.101098	0.233	0.156	0.109178
Kdm6b	4.75274e-06	0.141404	0.662	0.57	0.110197
Rpf1	4.76137e-06	0.079858	0.125	0.067	0.110397
Vezf1	4.76271e-06	0.137621	0.535	0.448	0.110428
Adamts5	4.77018e-06	0.0971412	0.152	0.089	0.110601
Myh10	5.13699e-06	0.159425	0.725	0.674	0.119106
Sf3a3	5.33304e-06	0.104382	0.188	0.119	0.123652
Mrps33	5.38393e-06	0.104913	0.198	0.127	0.124832
Uqcrb	5.44035e-06	0.0829159	0.144	0.083	0.12614
Rrp1	5.57489e-06	0.108101	0.261	0.179	0.129259
Ttbk2	5.64988e-06	0.113406	0.245	0.167	0.130998
Trp53inp2	5.82571e-06	0.113201	0.321	0.232	0.135075
Psmc6	6.19601e-06	0.128476	0.481	0.389	0.143661
Hnrnpa2b1	6.30628e-06	0.105275	0.954	0.921	0.146217
Vps4a	6.42738e-06	0.0848483	0.137	0.078	0.149025
Ppp4c	6.47734e-06	0.0940458	0.231	0.154	0.150184
Dnttip2	6.72125e-06	0.0912154	0.169	0.103	0.155839
Nt5dc2	6.92887e-06	0.0899814	0.179	0.112	0.160653
Mex3a	6.94419e-06	0.132022	0.804	0.742	0.161008
St13	7.0345e-06	0.119096	0.488	0.393	0.163102
Lrfn4	7.24732e-06	0.0789434	0.105	0.054	0.168036
Zbtb33	7.44011e-06	0.0804381	0.134	0.075	0.172506
Snrpb	7.52601e-06	0.12211	0.3	0.218	0.174498
Zc3h18	7.66693e-06	0.122036	0.292	0.211	0.177765
Naa20	7.70659e-06	0.119173	0.214	0.143	0.178685
Elob	7.83822e-06	0.115542	0.436	0.335	0.181737
Zdhhc2	7.85715e-06	0.183924	0.566	0.476	0.182176
Ncl	8.12178e-06	0.161544	0.658	0.593	0.188312
Ddx27	8.24654e-06	0.0841291	0.151	0.089	0.191204
Eif3a	8.25301e-06	0.145446	0.746	0.666	0.191354
mt-Co3	8.36727e-06	-0.207557	1	1	0.194004
Cox8a	8.38185e-06	0.123307	0.314	0.232	0.194342
Zik1	8.49697e-06	0.0975029	0.15	0.089	0.197011
Psap	8.52726e-06	0.108214	0.353	0.263	0.197713
Tspan6	8.56779e-06	0.0934159	0.141	0.083	0.198653
Scg3	8.88234e-06	0.144743	0.522	0.438	0.205946
Prpf19	8.91121e-06	0.0979574	0.209	0.137	0.206615
Cox17	8.91626e-06	0.0733468	0.108	0.056	0.206732
Sf3b2	8.93548e-06	0.0963161	0.603	0.485	0.207178
Vat1	8.99216e-06	0.0750266	0.108	0.056	0.208492
Rnf10	9.07732e-06	0.122226	0.388	0.299	0.210467
Ackr3	9.10255e-06	0.128657	0.276	0.195	0.211052
Morf4l2	9.14009e-06	0.128084	0.412	0.324	0.211922
Pygo1	9.30846e-06	0.10649	0.36	0.269	0.215826
Pdia3	9.5981e-06	0.142624	0.338	0.257	0.222542
Tmsb10	9.66511e-06	0.153315	0.733	0.688	0.224095
Rpl7a	9.77184e-06	0.15185	0.557	0.48	0.22657
mt-Co2	1.03138e-05	-0.212447	1	1	0.239136
Ddah2	1.04225e-05	0.0954196	0.285	0.201	0.241657
Wbp11	1.05418e-05	0.125393	0.287	0.208	0.244422
Gm1673	1.05797e-05	0.112044	0.396	0.306	0.245301
Crnkl1	1.07064e-05	0.0849687	0.154	0.092	0.248238
Atp6v0e	1.0763e-05	0.0921871	0.169	0.105	0.249551
Edf1	1.1208e-05	0.0934762	0.21	0.139	0.259869
Zfp354c	1.12596e-05	0.105815	0.326	0.239	0.261064
Gabarap	1.1343e-05	0.123341	0.37	0.285	0.263
Rps24	1.1535e-05	0.133635	0.855	0.802	0.26745
Lamp1	1.15504e-05	0.10149	0.267	0.187	0.267807
Nfe2l1	1.1869e-05	0.109504	0.266	0.189	0.275194
Mphosph8	1.20479e-05	0.120876	0.392	0.303	0.279342
Eif3d	1.21162e-05	0.0937675	0.19	0.122	0.280926
Zmat4	1.24716e-05	-0.121253	0.075	0.134	0.289166
Phf23	1.25987e-05	0.0697392	0.131	0.075	0.292112
Cdc42bpb	1.27995e-05	0.116091	0.376	0.29	0.29677
Odc1	1.28957e-05	0.103034	0.229	0.156	0.298999
Tspyl4	1.29622e-05	0.0950131	0.231	0.156	0.300541
Rhoa	1.31669e-05	0.154557	0.419	0.34	0.305289
Sorbs2os	1.32285e-05	0.0846844	0.126	0.071	0.306716
Nap1l1	1.35455e-05	0.13407	0.696	0.63	0.314065
Usp45	1.36834e-05	0.0971928	0.344	0.256	0.317264
5330438D12Rik	1.38244e-05	0.0861566	0.16	0.098	0.320532
Tmx2	1.38336e-05	0.0927113	0.183	0.117	0.320745
Rabl3	1.40195e-05	0.0850896	0.145	0.087	0.325057
Prdx1	1.40754e-05	0.120674	0.202	0.133	0.326353
Arl4c	1.40982e-05	0.0973792	0.198	0.129	0.326882
Cep164	1.44147e-05	0.106915	0.266	0.188	0.334218
Sox2	1.44274e-05	0.158384	0.443	0.362	0.334514
Exosc9	1.44702e-05	0.0803455	0.134	0.077	0.335507
Mdh1	1.47751e-05	0.102049	0.228	0.155	0.342577
Pacs2	1.49475e-05	0.105278	0.267	0.189	0.346574
Atp6v0c	1.49646e-05	0.106211	0.27	0.193	0.346968
Uqcrh	1.50812e-05	0.118979	0.362	0.276	0.349672
Ctif	1.52984e-05	-0.142812	0.483	0.58	0.354709
Rer1	1.53301e-05	0.0778894	0.115	0.063	0.355443
Ubn1	1.54641e-05	0.129825	0.442	0.351	0.35855
Med13l	1.57019e-05	-0.143735	0.647	0.737	0.364065
Selenoi	1.57976e-05	0.105544	0.291	0.21	0.366284
Mettl23	1.63354e-05	0.0871702	0.13	0.075	0.378753
Gspt1	1.63919e-05	0.122384	0.349	0.266	0.380063
Mrpl30	1.65898e-05	0.0926388	0.134	0.078	0.384652
Mex3d	1.67129e-05	0.077406	0.176	0.111	0.387505
Timm8b	1.68153e-05	0.0926758	0.167	0.105	0.389881
Hdgf	1.72088e-05	0.121059	0.317	0.237	0.399002
Bsg	1.72797e-05	0.0863493	0.254	0.176	0.400648
Midn	1.74109e-05	0.114178	0.535	0.438	0.403689
Hes5	1.74544e-05	0.120102	0.185	0.121	0.404698
Zfp422	1.75488e-05	0.0876704	0.173	0.11	0.406887
Ckap4	1.78144e-05	0.110622	0.337	0.252	0.413044
Zbtb26	1.79238e-05	0.0849293	0.138	0.081	0.415582
Cdk8	1.81824e-05	-0.15005	0.661	0.741	0.421578
Hnrnpk	1.84182e-05	0.129772	0.754	0.683	0.427043
Atp5j2	1.85728e-05	0.0813427	0.265	0.184	0.430629
Pgp	1.85971e-05	0.074249	0.107	0.057	0.431193
Hsp90b1	1.88766e-05	0.162759	0.441	0.362	0.437673
Mpped2	1.8984e-05	-0.233401	0.901	0.918	0.440164
Gm13889	1.89861e-05	0.0713248	0.11	0.06	0.440212
Plcxd3	1.90572e-05	0.344048	0.464	0.382	0.441861
Scrt1	1.91515e-05	0.115662	0.434	0.342	0.444046
Akap11	1.93492e-05	0.13001	0.5	0.411	0.448632
Slc39a7	1.93807e-05	0.0736259	0.135	0.079	0.44936
Lsm6	1.95049e-05	0.0869722	0.146	0.088	0.45224
Pdik1l	1.96119e-05	0.123075	0.221	0.152	0.454722
Zfp521	1.96378e-05	-0.197898	0.407	0.489	0.455321
Cnpy2	1.98511e-05	0.0893993	0.154	0.094	0.460269
Med19	2.0157e-05	0.0863588	0.158	0.098	0.467359
Crmp1	2.01807e-05	0.12069	0.578	0.498	0.46791
Rnd2	2.15074e-05	0.0776277	0.123	0.07	0.49867
Nme2	2.17603e-05	0.111015	0.34	0.255	0.504533
Rpl23a	2.19815e-05	0.151081	0.693	0.643	0.509663
Smc3	2.21476e-05	0.15823	0.511	0.439	0.513513
Dbi	2.23856e-05	0.0887679	0.23	0.158	0.519033
Atxn1	2.2396e-05	-0.169731	0.434	0.524	0.519273
Rpl22	2.26947e-05	0.128985	0.438	0.351	0.5262
Pphln1	2.27604e-05	0.104905	0.309	0.225	0.527723
Ubxn1	2.27878e-05	0.104239	0.229	0.158	0.528358
Zic1	2.29851e-05	-0.153707	0.311	0.4	0.532932
Pgam1	2.36687e-05	0.0840542	0.203	0.134	0.548783
Gm32061	2.37124e-05	0.212399	0.38	0.308	0.549796
Hras	2.38839e-05	0.0721887	0.123	0.07	0.553772
Psma7	2.39255e-05	0.117117	0.433	0.342	0.554736
Gas5	2.40141e-05	0.122725	0.358	0.275	0.556791
Rplp0	2.40522e-05	0.141899	0.7	0.645	0.557675
Pfdn5	2.43404e-05	0.0935922	0.342	0.254	0.564357
Fkbp3	2.44953e-05	0.116046	0.286	0.21	0.567947
Cox6b1	2.49609e-05	0.0971711	0.304	0.223	0.578744
Dnaja2	2.51123e-05	0.125819	0.347	0.269	0.582255
Pam	2.60225e-05	0.175062	0.365	0.283	0.603358
Lamtor2	2.62165e-05	0.0696682	0.104	0.056	0.607855
Zfhx3	2.62679e-05	-0.17023	0.589	0.7	0.609047
Zfp536	2.66129e-05	0.211894	0.714	0.669	0.617046
Ubxn4	2.67188e-05	0.133034	0.518	0.43	0.619501
Strbp	2.68805e-05	0.119653	0.947	0.936	0.623251
Mir124a-1hg	2.693e-05	-0.152694	0.588	0.661	0.624398
Srp9	2.70042e-05	0.0646138	0.128	0.074	0.62612
Plxna4	2.70051e-05	-0.368231	0.365	0.433	0.62614
Cox7c	2.77271e-05	0.105409	0.471	0.376	0.64288
Mfap2	2.79443e-05	0.084078	0.138	0.083	0.647917
Ahcyl1	2.81004e-05	0.116203	0.44	0.353	0.651537
Tmem126a	2.86243e-05	0.0708394	0.154	0.094	0.663684
Tcp1	2.89591e-05	0.103423	0.397	0.311	0.671446
Acrbp	2.899e-05	-0.0731548	0.076	0.133	0.672162
Jun	2.91287e-05	0.0750898	0.132	0.078	0.675378
Gpi1	2.92342e-05	0.0984096	0.196	0.13	0.677824
Brpf1	2.9644e-05	0.0789213	0.144	0.087	0.687326
Phb2	2.98843e-05	0.0903593	0.213	0.144	0.692897
Ncor1	2.99519e-05	0.119488	0.872	0.836	0.694465
Egln1	3.0868e-05	0.0955243	0.338	0.254	0.715704
Gnai2	3.12702e-05	0.139823	0.611	0.548	0.72503
Vcpip1	3.12913e-05	0.100319	0.358	0.272	0.725519
Mlf2	3.19814e-05	0.0927454	0.208	0.141	0.74152
Cisd1	3.22075e-05	0.0655257	0.141	0.084	0.746764
Vcp	3.23957e-05	0.128798	0.821	0.775	0.751126
Uchl1	3.24918e-05	0.122644	0.324	0.245	0.753356
Capza2	3.25579e-05	0.130159	0.341	0.263	0.754888
Rad23b	3.28528e-05	0.106543	0.469	0.376	0.761726
Hnrnpab	3.33013e-05	0.111975	0.6	0.509	0.772125
Cenpe	3.40238e-05	0.203455	0.267	0.198	0.788877
Rp9	3.4138e-05	0.109225	0.272	0.198	0.791525
Arpc3	3.46061e-05	0.0764985	0.181	0.117	0.802376
Azi2	3.46098e-05	0.0810026	0.288	0.207	0.802462
Mcm7	3.48636e-05	0.092668	0.234	0.163	0.808348
Dusp11	3.50471e-05	0.10625	0.326	0.248	0.812601
Chrnb2	3.52897e-05	0.0818605	0.157	0.098	0.818228
Vav3	3.60106e-05	-0.288264	0.317	0.386	0.834943
Gm16599	3.60629e-05	0.0862521	0.179	0.117	0.836155
Ldha	3.62927e-05	0.0871875	0.154	0.096	0.841484
Slc25a3	3.66704e-05	0.111078	0.338	0.258	0.850239
Trim35	3.69861e-05	0.122427	0.512	0.436	0.85756
Bex3	3.76781e-05	0.101612	0.279	0.203	0.873605
Bax	3.78535e-05	0.0903103	0.181	0.118	0.877671
Srgap3	3.8259e-05	-0.158575	0.862	0.906	0.887073
Mif	3.86218e-05	0.0949975	0.312	0.23	0.895486
Rps3a1	3.91498e-05	0.150896	0.62	0.553	0.907726
Uqcrq	4.00889e-05	0.0933291	0.265	0.19	0.929501
Eif3k	4.00913e-05	0.096478	0.256	0.183	0.929557
Pin1	4.03542e-05	0.078692	0.12	0.069	0.935653
Sub1	4.08482e-05	0.103758	0.296	0.22	0.947107
Orc4	4.10307e-05	0.127441	0.495	0.411	0.951337
Arl4d	4.15691e-05	0.103649	0.187	0.125	0.96382
Kcnd2	0.00052086	0.313199	0.451	0.394	1
Epha5	0.039092	0.272497	0.628	0.599	1
Gm44593	0.00824556	0.25835	0.535	0.509	1
Dach1	0.128478	0.225039	0.417	0.406	1
Robo2	0.380484	0.209356	0.824	0.818	1
Npas3	0.000914348	0.208479	0.926	0.945	1
Erbb4	0.000804413	0.202873	0.946	0.937	1
Adgrv1	0.206788	0.198335	0.386	0.386	1
Mki67	0.00806652	0.195202	0.395	0.355	1
Hbb-y	0.959929	0.194886	0.114	0.113	1
Dlgap1	0.397377	0.190369	0.269	0.255	1
Pcdh17	0.000106843	0.186032	0.527	0.452	1
Ccnd2	0.000295138	0.181518	0.495	0.431	1
Khdrbs2	0.0687664	0.174813	0.681	0.67	1
Nr2f2	0.00144267	0.171808	0.331	0.27	1
Fstl5	0.638841	0.164947	0.369	0.37	1
Gm47283	0.000358221	0.163135	0.451	0.393	1
Zeb2	0.00993132	0.156533	0.567	0.529	1
Stmn2	6.46853e-05	0.153741	0.624	0.562	1
Tafa2	0.268027	0.153174	0.166	0.149	1
Ina	0.000282604	0.152246	0.459	0.396	1
Dach2	0.000510101	0.148555	0.455	0.387	1
Pcdh19	0.00376071	0.144519	0.312	0.26	1
Rps7	0.000392328	0.14439	0.684	0.64	1
Kpna3	7.29637e-05	0.14417	0.613	0.548	1
Epha4	0.0239755	0.139675	0.806	0.798	1
Srgap2	0.00469264	0.139406	0.467	0.417	1
Pou3f3	0.000114878	0.139036	0.53	0.448	1
Mir124-2hg	0.00013847	0.138741	0.703	0.678	1
Akt3	0.00428074	0.138673	0.838	0.815	1
Smoc1	0.00890067	0.137981	0.376	0.322	1
Nol4	0.00778415	0.137777	0.94	0.951	1
Anp32b	5.39938e-05	0.136236	0.316	0.243	1
Klf7	0.00097089	0.135897	0.659	0.622	1
Dynll1	5.02837e-05	0.134204	0.436	0.36	1
Csrnp3	0.000267097	0.133987	0.897	0.867	1
Cdh10	0.0684559	0.133207	0.287	0.252	1
Rab3c	0.00106349	0.132692	0.647	0.593	1
Ppia	7.01585e-05	0.13086	0.554	0.48	1
Slit2	0.210433	0.130462	0.484	0.484	1
Canx	0.00139269	0.130305	0.548	0.51	1
Gpm6b	4.43698e-05	0.129842	0.705	0.658	1
Ptms	0.000177406	0.128855	0.663	0.604	1
Tspan13	5.82858e-05	0.128366	0.466	0.383	1
Smc1a	0.000214809	0.128281	0.483	0.41	1
Eif3f	6.77553e-05	0.127127	0.331	0.262	1
Top2a	0.0389164	0.126659	0.466	0.444	1
Etv1	0.000660082	0.126607	0.196	0.141	1
Etf1	0.000203848	0.126222	0.316	0.251	1
H2afz	0.0110178	0.125874	0.563	0.53	1
Brd2	4.36324e-05	0.125213	0.417	0.337	1
Hmga2	0.010348	0.125063	0.188	0.151	1
Nsg2	8.08439e-05	0.124964	0.629	0.555	1
Ccnd1	0.00338376	0.124847	0.344	0.295	1
Rps27a	0.000126818	0.124663	0.705	0.668	1
Hnrnpa3	5.23641e-05	0.12456	0.638	0.582	1
Fign	0.00602026	0.124407	0.838	0.823	1
Slc39a10	6.57484e-05	0.123888	0.344	0.271	1
Gls	0.00264118	0.123717	0.636	0.604	1
Ahi1	0.000324258	0.12252	0.428	0.363	1
Apc2	4.72843e-05	0.121949	0.498	0.415	1
Mir99ahg	0.612558	0.121818	0.719	0.795	1
Psmd11	7.60939e-05	0.121547	0.46	0.381	1
Rps9	7.51364e-05	0.121404	0.821	0.793	1
Nucks1	0.00151692	0.121092	0.61	0.568	1
Nfia	0.647155	0.120829	0.558	0.572	1
Lsamp	0.0599532	0.120795	0.821	0.786	1
Trp53inp1	0.000228131	0.120266	0.453	0.381	1
Ezh2	8.52156e-05	0.120191	0.868	0.825	1
Caap1	4.65607e-05	0.119684	0.432	0.345	1
Arhgap5	0.000777171	0.11965	0.657	0.62	1
Rpl12	6.16543e-05	0.11931	0.589	0.51	1
Lcor	5.08037e-05	0.118489	0.903	0.886	1
Zc3h13	0.00172349	0.118477	0.551	0.502	1
Siah3	0.000212773	0.118425	0.172	0.117	1
Pou3f1	8.70932e-05	0.118047	0.302	0.23	1
Gtdc1	0.0171696	0.118037	0.463	0.422	1
Rps27	0.000217099	0.117944	0.434	0.359	1
Mest	0.00384287	0.117573	0.658	0.613	1
Actr2	0.000103447	0.117216	0.455	0.376	1
Peg10	0.00800987	0.117009	0.33	0.282	1
Ide	4.58661e-05	0.116624	0.302	0.229	1
Smarcd1	5.61597e-05	0.116493	0.443	0.361	1
Pten	0.0013133	0.116477	0.72	0.683	1
Morf4l1	0.00032483	0.116343	0.699	0.651	1
Hnrnpd	0.00853639	0.115771	0.676	0.67	1
Dzip3	0.000281918	0.114797	0.665	0.617	1
Tle5	7.83127e-05	0.114776	0.44	0.36	1
Btbd7	0.00014682	0.114531	0.784	0.759	1
Naca	0.000240552	0.114425	0.498	0.423	1
Zcchc7	5.39437e-05	0.11439	0.876	0.821	1
Smarce1	0.000342483	0.113871	0.656	0.606	1
Rdx	0.00373685	0.113808	0.679	0.65	1
Atp5e	0.000104295	0.113281	0.287	0.218	1
Negr1	0.368955	0.113139	0.772	0.785	1
Mpp6	0.00126636	0.113138	0.325	0.263	1
Rps6	0.000712146	0.113095	0.557	0.492	1
Mdk	8.89544e-05	0.113095	0.328	0.255	1
Capn7	9.42649e-05	0.112742	0.302	0.231	1
Rcn2	0.000231547	0.112534	0.475	0.402	1
Cdc42	0.00022492	0.112397	0.48	0.409	1
Nop58	0.000584166	0.112353	0.307	0.247	1
Qk	8.4576e-05	0.112353	0.984	0.976	1
Fth1	0.000534726	0.11223	0.263	0.201	1
Suco	0.000309012	0.112051	0.478	0.406	1
Ripor2	0.00515414	0.111976	0.753	0.698	1
Cadm4	4.51668e-05	0.111971	0.323	0.245	1
Rpl10	0.000431115	0.111961	0.485	0.409	1
Stmn3	0.000233105	0.111919	0.442	0.366	1
Fnbp1l	9.34511e-05	0.111806	0.94	0.909	1
Trp53i11	6.25211e-05	0.11174	0.326	0.248	1
Rps6ka5	0.000495957	0.111256	0.405	0.333	1
Bmpr2	0.000158	0.111239	0.894	0.89	1
Nr6a1os	0.0156441	0.111157	0.372	0.325	1
Pdap1	0.000267124	0.111092	0.432	0.355	1
Afg3l1	0.000102779	0.110848	0.275	0.207	1
Rps29	0.000233239	0.110517	0.642	0.579	1
Rab7	8.32879e-05	0.110503	0.368	0.289	1
Gpc6	0.282364	0.109899	0.906	0.901	1
Ascl1	0.000386717	0.109893	0.262	0.201	1
Pak2	0.00246595	0.109608	0.53	0.478	1
Sem1	4.91667e-05	0.10958	0.386	0.302	1
H1f0	6.05003e-05	0.109463	0.274	0.202	1
Rps20	7.52382e-05	0.109422	0.809	0.74	1
Zdbf2	0.405536	0.108902	0.337	0.336	1
Ywhae	0.000103486	0.10869	0.857	0.835	1
Ppp2ca	0.000589114	0.108682	0.517	0.44	1
Fabp5	8.68113e-05	0.108644	0.332	0.253	1
Rpl36	0.00101474	0.108507	0.577	0.524	1
Map4k5	6.71048e-05	0.108351	0.391	0.311	1
Itgb1	0.000202058	0.108341	0.511	0.432	1
Utrn	0.0280054	0.108245	0.217	0.185	1
Syt1	0.100821	0.108115	0.888	0.87	1
Ddx24	4.96575e-05	0.107973	0.361	0.279	1
B230219D22Rik	0.000159137	0.107308	0.422	0.344	1
Slc25a51	0.000146324	0.107123	0.375	0.3	1
Wac	0.000752282	0.10703	0.817	0.776	1
Rnf13	0.00177528	0.106915	0.378	0.319	1
Ndufa2	6.35289e-05	0.10644	0.246	0.178	1
Eif5b	0.000263923	0.106387	0.503	0.417	1
Atp6v1b2	0.000103799	0.10631	0.405	0.328	1
Son	0.000389493	0.10622	0.892	0.859	1
Klhl28	5.40457e-05	0.106202	0.251	0.182	1
Lrig2	0.00136684	0.106033	0.495	0.434	1
Cxadr	0.00446631	0.105884	0.513	0.462	1
Lix1l	0.000461544	0.105841	0.327	0.261	1
Iqcb1	0.000124334	0.105819	0.47	0.385	1
Chd3	0.000441571	0.105813	0.888	0.858	1
Gria4	0.3352	0.105597	0.691	0.681	1
Fez1	0.000131599	0.105328	0.511	0.431	1
Rpl30	0.00169179	0.105226	0.671	0.631	1
Cbx5	0.00530794	0.105105	0.697	0.672	1
Prkar1a	0.000109769	0.10497	0.444	0.363	1
Ddx5	0.00020097	0.104913	0.964	0.948	1
Mtx2	0.000336544	0.104886	0.294	0.23	1
Mis18bp1	8.55044e-05	0.104692	0.141	0.087	1
Jpt1	0.00159804	0.104437	0.687	0.663	1
Ccp110	8.58008e-05	0.104284	0.238	0.172	1
Umad1	0.00141956	0.104264	0.509	0.455	1
Sec62	0.000408145	0.104033	0.49	0.42	1
Aff4	0.00020479	0.10393	0.862	0.843	1
Rbm28	0.00045794	0.103825	0.308	0.244	1
Cdca8	0.000190894	0.103816	0.143	0.094	1
A230057D06Rik	0.0263945	0.103778	0.904	0.875	1
Stt3b	0.0024922	0.103739	0.342	0.287	1
Metap2	0.00176664	0.103652	0.479	0.418	1
Atf2	0.00292794	0.103602	0.755	0.728	1
Pde4dip	0.000251291	0.103592	0.3	0.229	1
Abcf1	0.000167795	0.103505	0.357	0.285	1
Ptprk	0.260853	0.103452	0.298	0.291	1
Zc3h15	0.000219091	0.103248	0.432	0.353	1
Ahcyl2	0.000954428	0.10324	0.422	0.35	1
Thsd7a	0.426721	0.10319	0.623	0.65	1
Mindy2	0.000212182	0.102784	0.327	0.253	1
D930016D06Rik	0.000170553	0.102588	0.283	0.215	1
Kdm7a	0.000351278	0.102381	0.595	0.526	1
Sesn3	0.000546916	0.102193	0.46	0.39	1
Hcn1	0.0116891	0.102114	0.259	0.209	1
Cdc5l	0.000322813	0.10171	0.329	0.263	1
Mtpn	7.43624e-05	0.101522	0.348	0.266	1
Fnip1	0.00564928	0.101377	0.482	0.433	1
Smap1	6.11847e-05	0.101362	0.419	0.331	1
Aplp2	0.00048142	0.101356	0.463	0.389	1
Mier1	0.00123026	0.101298	0.457	0.392	1
U2surp	0.00141818	0.101064	0.637	0.585	1
Cct3	0.000632725	0.101047	0.324	0.26	1
Tmed5	7.04048e-05	0.100832	0.173	0.115	1
Tcf12	0.000407727	0.100798	0.995	0.987	1
Herpud2	8.15e-05	0.100617	0.301	0.228	1
Prpf8	0.000340243	0.100578	0.291	0.227	1
Ldb1	7.3373e-05	0.100545	0.404	0.319	1
Btf3	0.000245002	0.100527	0.31	0.24	1
Msl2	0.000221464	0.100517	0.354	0.281	1
Sgpl1	0.000289933	0.100508	0.376	0.299	1
Dlx5	0.000249874	0.100508	0.322	0.251	1
Kif21b	0.000117682	0.100457	0.444	0.36	1
Ncs1	0.000164582	0.100045	0.245	0.18	1
CAAA01118383.1	5.78965e-05	0.0998837	0.28	0.206	1
Tex10	0.000175403	0.0998837	0.288	0.218	1
Gpsm1	4.69658e-05	0.0998392	0.295	0.217	1
Arl5a	0.000334424	0.0997043	0.381	0.306	1
Gap43	0.00189945	0.0995134	0.287	0.229	1
Parp1	0.000211638	0.0994262	0.355	0.28	1
Btbd1	0.00429418	0.0993854	0.459	0.413	1
Dhx36	0.000959273	0.0993005	0.674	0.638	1
Pcgf3	0.000449115	0.0992558	0.491	0.422	1
Atf7ip	0.0285081	0.0991955	0.747	0.742	1
Tox2	0.000141937	0.0991379	0.297	0.222	1
Ndfip1	0.00528438	0.0990828	0.516	0.455	1
Pgap1	0.000942955	0.0988319	0.494	0.42	1
H13	0.000825402	0.0986947	0.478	0.407	1
Rplp1	0.00148019	0.098658	0.816	0.767	1
Eif3m	0.000125257	0.0985862	0.247	0.182	1
Tmx4	0.000660833	0.0984479	0.406	0.333	1
Zfr	0.00222911	0.0984198	0.847	0.806	1
Adam10	0.0117067	0.0984001	0.608	0.575	1
Ubqln1	4.79229e-05	0.098396	0.337	0.256	1
Zfp638	0.000405465	0.0981047	0.915	0.89	1
Calm2	0.00168219	0.0979082	0.797	0.752	1
Cenpf	0.00169842	0.0976868	0.317	0.255	1
Hist1h1b	0.000622978	0.0976096	0.308	0.244	1
Mllt11	0.000324579	0.0975589	0.394	0.321	1
Napb	5.48182e-05	0.0974858	0.262	0.19	1
Resf1	0.0047839	0.0974031	0.376	0.322	1
Arl2bp	9.85766e-05	0.0973292	0.247	0.18	1
Atad1	0.000524184	0.0973025	0.399	0.325	1
Rpl38	0.00305443	0.0969878	0.499	0.437	1
Tm9sf2	0.000208669	0.0968376	0.343	0.27	1
Casp8ap2	0.00744803	0.0968264	0.328	0.281	1
Id4	0.000342281	0.0967893	0.226	0.167	1
Wbp4	0.00019733	0.0967575	0.373	0.298	1
Arrdc3	0.000132685	0.0965591	0.203	0.142	1
Ptprf	0.00167515	0.0965435	0.357	0.299	1
Ncbp1	0.000464826	0.0964691	0.301	0.237	1
Rps4x	0.000755986	0.0964533	0.662	0.606	1
Csnk1e	5.89453e-05	0.0961137	0.534	0.442	1
Notch1	0.0109516	0.0959373	0.237	0.194	1
Tmem30a	0.000249608	0.095868	0.375	0.302	1
Socs4	5.41281e-05	0.0957296	0.221	0.154	1
Ncan	0.000386349	0.095717	0.545	0.471	1
Peg3	0.0852985	0.0956118	0.662	0.652	1
Vps35	0.00033827	0.0955808	0.39	0.314	1
Ccnt1	0.00297551	0.0955773	0.476	0.422	1
Dek	0.111336	0.0955489	0.432	0.417	1
Ctbp2	0.000533487	0.0955123	0.263	0.201	1
Msl1	0.000136521	0.0954846	0.407	0.325	1
Wnk3	0.000314154	0.0954824	0.428	0.352	1
Dbn1	0.00371296	0.0954093	0.716	0.682	1
Tmem200a	0.00220156	0.0952536	0.303	0.249	1
Mtch1	0.00016581	0.0952334	0.364	0.289	1
Akr1a1	0.000400819	0.0952334	0.35	0.28	1
Dnajc5	0.00095838	0.0952274	0.472	0.406	1
Enah	0.000319091	0.095169	0.978	0.954	1
Glud1	0.000205575	0.09507	0.31	0.238	1
Tecr	0.000860854	0.0948499	0.303	0.243	1
Nol7	6.54083e-05	0.0948018	0.23	0.162	1
Atp5g2	0.000149027	0.0947864	0.365	0.287	1
Diaph2	0.102865	0.09477	0.404	0.385	1
Hist1h4d	0.000842315	0.0947684	0.293	0.23	1
Ndfip2	0.000159865	0.0947511	0.366	0.289	1
Rbm41	0.000480036	0.0946889	0.313	0.244	1
Atpif1	0.00106625	0.0945521	0.485	0.418	1
Tmem50a	0.000156	0.0943841	0.276	0.206	1
Gng5	8.21399e-05	0.0942957	0.202	0.139	1
Uba6	0.00813214	0.0942957	0.446	0.391	1
Atp5d	0.000563548	0.094089	0.223	0.167	1
Eif2a	0.000153539	0.0940731	0.292	0.219	1
Mapre1	0.0010044	0.0939403	0.411	0.346	1
Tsn	0.00228345	0.0939403	0.402	0.347	1
Hook3	0.00172612	0.0936324	0.821	0.788	1
Acvr2b	0.00272113	0.0936029	0.625	0.562	1
Nsa2	0.00197679	0.0935268	0.329	0.268	1
Lrrc58	0.00271472	0.0934877	0.452	0.393	1
Ddi2	0.00118751	0.0934859	0.24	0.186	1
Drg1	0.000327268	0.0932807	0.358	0.286	1
Hspa4	0.000441008	0.093258	0.459	0.39	1
Tmem132a	0.000102797	0.0930899	0.302	0.229	1
Hells	0.0181198	0.0930025	0.203	0.166	1
Alyref	5.7565e-05	0.0929567	0.199	0.135	1
Phc3	0.000394019	0.0929283	0.384	0.313	1
Bri3	0.000147262	0.0928097	0.239	0.175	1
Rsbn1	0.00331316	0.0928048	0.553	0.502	1
Sept11	0.00109838	0.0926977	0.444	0.383	1
Snx3	0.000849478	0.092508	0.353	0.283	1
Cab39	0.000409247	0.0925048	0.47	0.395	1
Kif21a	0.00104157	0.0924856	0.709	0.639	1
Slc25a46	0.00195469	0.0924701	0.297	0.24	1
Enc1	0.00458193	0.0924399	0.37	0.314	1
Hmgcr	0.000739154	0.0923818	0.344	0.275	1
Zfp106	0.00305947	0.0923178	0.384	0.328	1
Tank	8.31273e-05	0.0922611	0.221	0.156	1
Fermt2	0.00215974	0.0922405	0.263	0.209	1
Zfp322a	0.000189536	0.0921769	0.317	0.243	1
H2afy	0.00683334	0.0921758	0.504	0.458	1
Bzw1	0.00102601	0.0920979	0.41	0.345	1
Ywhah	0.000190379	0.0920592	0.237	0.174	1
Bbip1	0.00347316	0.0920249	0.364	0.31	1
Snrpd2	4.90156e-05	0.0919552	0.266	0.193	1
Dleu2	0.0939618	0.0918744	0.668	0.668	1
Serinc1	0.0029444	0.0918083	0.449	0.387	1
Bcas2	0.000255659	0.0917571	0.215	0.156	1
Nr2e1	0.00171595	0.0915915	0.309	0.248	1
Reln	0.020459	0.0915445	0.123	0.094	1
Srp72	0.000573387	0.0913841	0.304	0.24	1
Igfbp5	0.00172468	0.0913183	0.12	0.081	1
Zfp160	0.000317877	0.091309	0.335	0.265	1
Mthfd2l	0.00868348	0.0911988	0.396	0.345	1
Kif11	0.0591292	0.0911762	0.204	0.174	1
Smc4	0.0521796	0.0911158	0.37	0.34	1
Vdac3	7.60639e-05	0.0910652	0.259	0.187	1
Ipo5	0.00603453	0.0910253	0.236	0.19	1
Ssb	0.00220825	0.0909836	0.5	0.434	1
Gm17750	0.0166112	0.0909824	0.454	0.414	1
Dstn	0.000173782	0.0909635	0.49	0.404	1
Mapk6	0.00094285	0.0909229	0.488	0.413	1
Epn1	0.000685425	0.0908009	0.232	0.175	1
Pfdn2	5.5582e-05	0.0907678	0.205	0.14	1
Cbwd1	0.0001951	0.0907678	0.193	0.136	1
Mybbp1a	0.000237821	0.0907324	0.157	0.105	1
Tbc1d5	0.0760793	0.0907218	0.487	0.467	1
Kras	0.00625911	0.0905821	0.599	0.548	1
Clcn3	0.000542101	0.090541	0.49	0.41	1
Txnrd1	0.000539195	0.0903253	0.4	0.326	1
Rbx1	0.000352327	0.0901623	0.378	0.306	1
Psmb3	5.98416e-05	0.0901567	0.209	0.144	1
Dync1i2	0.00156884	0.09011	0.882	0.857	1
Rai2	0.000389622	0.0900753	0.472	0.387	1
Ubc	7.63755e-05	0.0900691	0.254	0.183	1
Mxd4	0.000336527	0.0900677	0.298	0.231	1
Tmtc4	0.000753925	0.0900414	0.394	0.318	1
Gpc1	0.00103992	0.089931	0.24	0.185	1
Sp1	0.0043327	0.0897322	0.297	0.245	1
2810004N23Rik	0.000169783	0.0896372	0.207	0.146	1
Pnn	0.00132286	0.0896168	0.338	0.276	1
Mfap3	0.00146484	0.0896154	0.287	0.23	1
Mios	0.000139497	0.0895639	0.173	0.117	1
Dcun1d5	0.000922616	0.0895268	0.37	0.305	1
Psma1	0.00208404	0.0893942	0.265	0.211	1
Fbxo45	8.16431e-05	0.0893365	0.188	0.127	1
Gabarapl2	0.000153259	0.0892973	0.222	0.16	1
Msantd4	0.000261842	0.0892973	0.219	0.159	1
Cxxc4	0.0407266	0.0892174	0.48	0.46	1
Trim28	8.01916e-05	0.0890218	0.297	0.222	1
H1fx	0.000492215	0.0890067	0.328	0.259	1
Disp1	0.000125403	0.0889795	0.312	0.238	1
Map1a	0.000213679	0.0889632	0.225	0.163	1
Chd6	0.00382564	0.0888027	0.887	0.862	1
Rala	0.000641568	0.0887679	0.589	0.521	1
Gtf2h5	5.49849e-05	0.0886955	0.239	0.168	1
Atox1	0.000129078	0.0886365	0.145	0.094	1
Cnn3	0.00107909	0.0883869	0.395	0.326	1
Cpeb4	0.0020857	0.0883395	0.585	0.521	1
Chmp4b	0.000217065	0.0883056	0.251	0.186	1
Usp16	0.0016844	0.0882393	0.257	0.203	1
Cct4	0.000834996	0.0882097	0.329	0.263	1
Ube2s	0.00237802	0.0881799	0.393	0.328	1
Taf15	0.0218263	0.0880609	0.771	0.748	1
Ptpn11	0.000331121	0.0880417	0.313	0.24	1
Cdk4	0.000610031	0.0880172	0.409	0.34	1
Atp5a1	0.00114014	0.0880048	0.458	0.392	1
Mxi1	0.00516737	0.0878458	0.585	0.53	1
Rbm15b	0.000117161	0.0877404	0.198	0.137	1
BC005537	0.00269165	0.087713	0.503	0.452	1
Mcl1	0.000798787	0.0876806	0.247	0.189	1
Atad2	0.0149721	0.087568	0.189	0.151	1
Rlim	0.00354998	0.087434	0.404	0.348	1
Nudcd3	0.00402762	0.0874239	0.491	0.434	1
Fem1b	0.000176493	0.0873802	0.287	0.217	1
Pa2g4	4.70296e-05	0.0873529	0.22	0.152	1
Arpc4	7.6417e-05	0.0873285	0.165	0.107	1
Pnpla8	0.0014733	0.0873197	0.386	0.318	1
Rps28	0.000157961	0.0873006	0.528	0.442	1
Bclaf1	0.00244632	0.087253	0.796	0.739	1
Agpat5	0.000233415	0.0871917	0.265	0.197	1
Wdr75	0.000149404	0.0871255	0.166	0.111	1
Sumo2	0.00787826	0.0871163	0.511	0.466	1
Far1	0.00198447	0.0871099	0.52	0.457	1
Cul3	0.081479	0.0869032	0.626	0.617	1
Irf2bpl	0.0010365	0.0868835	0.335	0.271	1
Tiparp	0.00167069	0.0868229	0.293	0.233	1
Nop56	0.00496733	0.0867757	0.274	0.225	1
Tent4b	0.00281957	0.0867737	0.316	0.26	1
Mtif2	0.00663047	0.0867701	0.413	0.358	1
Eprs	0.0178795	0.0867259	0.363	0.322	1
Ccdc47	0.000139839	0.0866847	0.27	0.202	1
Mpnd	0.000127868	0.0866665	0.186	0.127	1
Cep170	0.00339528	0.0866468	0.912	0.872	1
Supt16	0.00893332	0.0865844	0.527	0.479	1
Nfya	0.000132319	0.0865034	0.21	0.148	1
Zfp944	0.000133463	0.0865034	0.216	0.152	1
Lsm4	0.000103717	0.0864336	0.212	0.148	1
P4hb	0.000145276	0.0864173	0.247	0.18	1
Sars	0.000249983	0.0862886	0.287	0.218	1
Ehmt2	0.000527398	0.0862416	0.295	0.229	1
Rnpc3	0.00372521	0.0862326	0.307	0.252	1
Trir	0.000122342	0.0862121	0.245	0.177	1
Eif3e	0.000182325	0.0861693	0.325	0.248	1
Cebpg	0.000112031	0.0861214	0.221	0.156	1
Mex3b	0.000311928	0.0860743	0.394	0.316	1
Lin52	0.0107524	0.0860169	0.326	0.279	1
Gulp1	0.000145882	0.0860062	0.106	0.061	1
Nup50	0.000248375	0.0859779	0.282	0.213	1
Wasl	0.00205242	0.0857897	0.454	0.387	1
Hnrnpf	0.0064984	0.0857635	0.298	0.249	1
Bfar	0.000117338	0.0856647	0.278	0.205	1
Api5	0.000294578	0.0855965	0.267	0.202	1
Cfl2	0.000840221	0.0855748	0.465	0.39	1
Snrpd3	0.000168472	0.0855131	0.235	0.17	1
Cpsf2	0.000632395	0.0854296	0.25	0.19	1
Cisd2	0.00397546	0.0853786	0.275	0.224	1
Avl9	0.00768838	0.0852682	0.489	0.433	1
Atp5c1	0.000546466	0.0852137	0.353	0.283	1
Anp32a	0.00100425	0.08516	0.308	0.245	1
Uqcrc2	0.000802438	0.0851015	0.256	0.195	1
Arpp19	0.00222608	0.0850971	0.284	0.229	1
Prpf40a	0.000418846	0.0850385	0.853	0.815	1
Pgk1	8.43586e-05	0.0849992	0.237	0.168	1
Nt5c3	0.00131278	0.0849266	0.191	0.142	1
B3gat3	0.000132937	0.0849258	0.235	0.169	1
Mecom	0.00493579	0.0848527	0.131	0.093	1
Tpm4	0.000302491	0.0848122	0.176	0.121	1
Impact	8.89768e-05	0.0847449	0.257	0.187	1
Vps54	0.0267763	0.0847442	0.418	0.379	1
Glrx3	0.0006594	0.0846219	0.323	0.256	1
Akirin2	0.00254185	0.0846024	0.365	0.306	1
Rbm15	0.00409261	0.0845989	0.231	0.182	1
Rab5if	0.00037822	0.0845716	0.151	0.102	1
Scaf11	0.00105622	0.0844951	0.403	0.331	1
Csnk2a2	0.00689023	0.0844604	0.39	0.336	1
Vps4b	0.000611136	0.0844474	0.316	0.251	1
Rab5b	0.00110219	0.0844383	0.285	0.224	1
Cct5	9.94329e-05	0.0843306	0.346	0.267	1
Cstf3	0.00481324	0.0843171	0.723	0.689	1
Srpr	0.00101733	0.0842881	0.213	0.16	1
Mia3	0.000320634	0.0842226	0.332	0.26	1
Cdk13	0.0115604	0.0842116	0.72	0.71	1
Swi5	0.000171901	0.0841797	0.222	0.158	1
Ube2g1	0.0153296	0.0841411	0.745	0.713	1
Rnf44	0.000180123	0.0841024	0.221	0.159	1
Dlx6	0.000315771	0.0840048	0.189	0.133	1
Mex3c	0.00507534	0.0839922	0.435	0.375	1
Preb	5.45437e-05	0.0839388	0.248	0.176	1
Rpl34	0.00315504	0.0839014	0.601	0.55	1
Txndc15	6.0628e-05	0.0838673	0.208	0.142	1
Brox	0.000622514	0.0838623	0.238	0.179	1
Btg1	0.00180129	0.0838453	0.34	0.275	1
Nectin1	0.000455979	0.083759	0.235	0.175	1
Rnf115	0.00239233	0.083731	0.318	0.257	1
Apaf1	0.00638292	0.083731	0.323	0.272	1
Actr1a	0.000344404	0.083685	0.364	0.29	1
Utp3	0.000145989	0.0836795	0.138	0.087	1
Cttn	0.000219967	0.0836298	0.236	0.173	1
Cdc37	0.000615546	0.0836078	0.264	0.202	1
Phax	0.000214182	0.0836014	0.208	0.148	1
Nedd8	0.00164294	0.0834861	0.268	0.212	1
Efnb1	0.000346971	0.0834793	0.25	0.187	1
Limd1	0.000565251	0.0834644	0.173	0.121	1
Clcc1	0.000203821	0.0834064	0.17	0.115	1
Eny2	0.000340504	0.0830884	0.233	0.171	1
Adipor2	0.000583281	0.0829742	0.288	0.224	1
Arhgap42	0.000543799	0.0829705	0.226	0.167	1
Pnrc1	0.00025376	0.0829472	0.218	0.156	1
St8sia4	0.00966373	0.0829343	0.408	0.352	1
1810026B05Rik	0.00989496	0.0829159	0.698	0.666	1
Dnajc18	0.00114422	0.0828474	0.307	0.244	1
Fzd3	0.00175196	0.0828398	0.85	0.829	1
Rpl32	0.0135274	0.0828068	0.737	0.717	1
Cep57l1	0.000509869	0.0828014	0.193	0.138	1
Caprin1	0.0079107	0.0827503	0.942	0.917	1
Ccdc14	0.00062304	0.0827027	0.143	0.097	1
Stk24	0.00220355	0.0826993	0.245	0.191	1
Coro1c	0.015879	0.0826941	0.405	0.361	1
Tmed7	0.000280949	0.0826677	0.229	0.167	1
Eif4ebp2	0.000805127	0.0826536	0.369	0.297	1
Slc39a6	0.000580387	0.0825258	0.251	0.189	1
Pcf11	0.000101985	0.0824658	0.353	0.27	1
Aimp1	0.00177371	0.0824059	0.281	0.225	1
Nrep	0.00818251	0.082348	0.675	0.644	1
Zfp410	0.00128675	0.0822914	0.297	0.234	1
Pxylp1	0.00577547	0.0822855	0.224	0.178	1
Zranb3	0.00733811	0.0822659	0.149	0.111	1
Snrnp27	0.000519618	0.0822406	0.219	0.161	1
Hcfc1	0.000334235	0.0822163	0.243	0.18	1
Dnajc8	0.00160196	0.0822148	0.3	0.24	1
Park7	0.0010701	0.0820834	0.198	0.147	1
Hspa4l	0.00324798	0.08206	0.269	0.216	1
Cyb5r3	5.96525e-05	0.0819719	0.132	0.08	1
Nob1	4.62049e-05	0.0819613	0.146	0.09	1
Itgb8	0.17134	0.0819523	0.274	0.254	1
Zfp30	0.000571233	0.0819483	0.238	0.179	1
Ptpn1	0.00532989	0.0818448	0.416	0.362	1
Ndufa10	0.000432036	0.0816779	0.269	0.204	1
Slc25a25	0.000197181	0.0815535	0.187	0.129	1
Kif24	0.0540797	0.0814545	0.138	0.113	1
Cd47	0.000870916	0.0814495	0.204	0.15	1
Aggf1	0.000235817	0.0814167	0.286	0.216	1
Tspan3	0.00100113	0.0814148	0.417	0.342	1
D10Wsu102e	0.00135544	0.0814124	0.264	0.207	1
Dynll2	0.00613492	0.0813077	0.333	0.28	1
Tyms	0.000268479	0.0812894	0.15	0.098	1
Psmd1	0.00531741	0.081255	0.442	0.388	1
Cbfb	0.0121684	0.0812418	0.254	0.211	1
Zfp871	0.00597931	0.0812051	0.406	0.35	1
Clock	0.00259707	0.0811926	0.437	0.369	1
Ppp1r7	0.000101188	0.0811825	0.229	0.162	1
Nr2f1	0.107648	0.0811069	0.512	0.485	1
Rgmb	0.00869251	0.0809892	0.403	0.346	1
Usp19	0.000189712	0.08092	0.198	0.138	1
Txndc16	5.76077e-05	0.08092	0.272	0.195	1
Ndufaf2	0.0013117	0.08092	0.291	0.23	1
Mkrn1	0.0120341	0.08092	0.319	0.275	1
Atp6v1g1	0.000245979	0.0808313	0.214	0.153	1
Fis1	0.00154574	0.0806733	0.285	0.227	1
Csnk2a1	0.00224755	0.0806432	0.628	0.572	1
Cggbp1	0.000509888	0.080565	0.206	0.15	1
Lasp1	0.000175657	0.0805616	0.206	0.145	1
Bicd2	4.68462e-05	0.0804617	0.187	0.124	1
Fam168b	0.00454356	0.0804106	0.521	0.468	1
Irgq	0.000304516	0.0803787	0.197	0.14	1
Prkar2a	0.00452367	0.0803665	0.301	0.247	1
Csde1	0.00431947	0.0802915	0.813	0.787	1
Pfdn1	0.00939874	0.0802855	0.299	0.252	1
Magel2	0.00213082	0.0802203	0.213	0.162	1
Pdcl	5.81587e-05	0.0801861	0.184	0.121	1
Fzd2	0.00105643	0.0801518	0.247	0.189	1
Tmpo	0.028313	0.0800714	0.562	0.533	1
Rab11b	0.00103294	0.0800686	0.354	0.286	1
Smarcc2	0.00415231	0.0800531	0.718	0.68	1
Kcnd3	0.128049	0.080004	0.484	0.45	1
Gipc1	4.41782e-05	0.0797807	0.146	0.09	1
Purb	0.00521674	0.0797547	0.326	0.271	1
Tdg	0.00312346	0.0797419	0.389	0.327	1
Slc38a2	0.0191864	0.079725	0.705	0.683	1
Npdc1	0.00324308	0.0796937	0.293	0.238	1
Scrn1	0.00430825	0.0796937	0.263	0.211	1
Brwd3	0.0160673	0.0796937	0.415	0.364	1
Tasor2	0.0274991	0.0796937	0.514	0.479	1
Actl6a	0.00270961	0.0796608	0.261	0.207	1
Puf60	0.00025837	0.0795602	0.259	0.193	1
Cpeb2	0.00642606	0.0794298	0.192	0.149	1
Sfrp1	0.000326955	0.0794158	0.2	0.141	1
Nono	0.028474	0.0793941	0.628	0.606	1
Samd14	0.000168813	0.0793294	0.332	0.254	1
Pafah1b2	0.00108258	0.079318	0.474	0.399	1
Lrch2	0.017575	0.0792589	0.562	0.517	1
Rsbn1l	0.00351776	0.0792212	0.409	0.351	1
Snrnp48	0.00131096	0.0792035	0.326	0.263	1
Tmco1	0.000504788	0.0791489	0.205	0.148	1
Bms1	0.00199475	0.0791148	0.185	0.138	1
Taldo1	0.000512365	0.0790716	0.215	0.157	1
Atp6v1c1	0.00118488	0.0790362	0.202	0.15	1
Nlgn1	0.815787	0.079032	0.704	0.721	1
Rtn1	0.0678784	0.0789959	0.764	0.771	1
Fmr1	0.00213081	0.0789812	0.354	0.292	1
Ap2m1	0.00033439	0.0789738	0.256	0.191	1
Ccdc90b	0.0013745	0.0789585	0.199	0.148	1
Usp9x	0.00882257	0.0789488	0.915	0.89	1
Prrc2c	0.0457423	0.0789073	0.949	0.923	1
Srsf2	0.00180044	0.0787939	0.428	0.363	1
2610316D01Rik	0.00374022	0.0787907	0.176	0.131	1
Elovl4	0.000189438	0.0787372	0.138	0.088	1
Sept9	0.000856233	0.0787103	0.216	0.16	1
Kidins220	0.0484011	0.0786857	0.665	0.652	1
Gm26672	0.000113106	0.0786795	0.152	0.098	1
Dcbld2	0.00312728	0.0786009	0.269	0.216	1
Lmo3	0.00595241	0.0785974	0.286	0.233	1
Ect2	0.00419853	0.0785696	0.13	0.092	1
Gxylt1	0.000117078	0.0785233	0.172	0.114	1
Dcaf10	0.0238184	0.0784964	0.304	0.263	1
Tbc1d16	0.00204065	0.0784722	0.349	0.288	1
Setd7	0.000172046	0.078284	0.363	0.279	1
Fjx1	0.00106687	0.078268	0.138	0.094	1
Chfr	0.00375799	0.078226	0.392	0.332	1
Psmd4	0.00825321	0.0781917	0.297	0.249	1
Faf1	0.0120302	0.0779573	0.77	0.744	1
Ubap2l	0.0267253	0.0779202	0.682	0.669	1
Leprotl1	0.000265378	0.0779079	0.215	0.154	1
Cap1	0.000245005	0.0778948	0.24	0.175	1
Hmox2	0.000196436	0.0778624	0.162	0.108	1
Naa15	0.0311666	0.0778532	0.559	0.53	1
Lpgat1	0.00376799	0.0778423	0.453	0.388	1
Kdm4a	0.00318688	0.0778124	0.339	0.28	1
Gm20045	0.000144314	0.0777895	0.172	0.115	1
Scp2	0.000125412	0.0776944	0.141	0.089	1
Uba2	0.00656849	0.077678	0.29	0.24	1
Dld	8.42001e-05	0.0776704	0.223	0.156	1
Emc10	0.00094946	0.0776704	0.224	0.168	1
Xpo5	0.000649053	0.0776396	0.204	0.148	1
Vapa	0.00499714	0.0775933	0.478	0.419	1
Twf1	8.0922e-05	0.0775817	0.17	0.111	1
Rcor2	0.00369062	0.0775491	0.324	0.267	1
Ranbp2	0.0066464	0.0775371	0.519	0.467	1
Snapc1	0.00176578	0.077507	0.19	0.141	1
Farsb	0.0167167	0.0775005	0.226	0.189	1
Rc3h2	0.0129235	0.077431	0.826	0.806	1
Mbd5	0.0143637	0.0773799	0.958	0.96	1
Dis3	0.000194589	0.0773709	0.155	0.102	1
Prdm16	0.00325903	0.0773378	0.143	0.102	1
Ndufaf7	0.000513228	0.0773352	0.144	0.097	1
Nufip2	0.00324343	0.0773248	0.529	0.467	1
Eya3	0.0536068	0.0773204	0.431	0.395	1
Eif4h	0.02141	0.0773128	0.335	0.294	1
Mettl9	0.0120223	0.0772368	0.406	0.355	1
Rbbp8	0.00346048	0.0772185	0.253	0.202	1
Scyl3	0.000141856	0.0771945	0.163	0.108	1
Spred1	0.008228	0.0771864	0.253	0.208	1
Snhg14	0.0338146	0.0771513	0.768	0.739	1
Trim23	0.0026184	0.0771487	0.256	0.202	1
Tkt	0.00025533	0.0771255	0.166	0.112	1
Atp5g3	0.00114076	0.0770949	0.179	0.13	1
Clpx	0.00607647	0.0770668	0.301	0.251	1
Zfand5	0.00488757	0.0769931	0.522	0.463	1
Xpo1	0.0128794	0.0769844	0.688	0.65	1
Vti1b	0.000200151	0.0769817	0.245	0.179	1
Dcakd	0.0102507	0.0768922	0.311	0.264	1
Ccdc34	0.0496175	0.0768768	0.439	0.411	1
Plekha8	0.00366662	0.0767832	0.233	0.183	1
Rps16	0.0109199	0.076733	0.736	0.701	1
Dtl	0.0124153	0.0766711	0.12	0.088	1
Hmgb2	0.0353813	0.0766524	0.507	0.477	1
Clpp	0.000778643	0.0765416	0.215	0.159	1
Ap4e1	0.00604208	0.0765033	0.281	0.232	1
Slc25a5	0.000355126	0.0765018	0.255	0.19	1
Pip4p2	0.023635	0.0764938	0.409	0.363	1
Cyp51	0.0135611	0.0764829	0.243	0.202	1
Tsc1	0.0166117	0.0763852	0.363	0.319	1
Cdkn1c	0.005173	0.0763797	0.334	0.278	1
Eef1d	6.94783e-05	0.0763715	0.188	0.125	1
Mlec	0.00128308	0.0763452	0.152	0.106	1
Rtf1	0.0127993	0.0763097	0.574	0.52	1
Rpgrip1l	0.00216247	0.0763017	0.235	0.181	1
Secisbp2l	0.000767223	0.0761852	0.314	0.245	1
Yae1d1	0.000629761	0.0761562	0.17	0.119	1
Heatr5b	0.00234702	0.0761185	0.314	0.256	1
Lztfl1	0.00213428	0.076099	0.231	0.177	1
Lrrc59	0.000478164	0.0760754	0.14	0.093	1
Pgrmc2	0.000710186	0.0760474	0.17	0.119	1
Malsu1	0.00206302	0.0760212	0.199	0.15	1
Mtch2	0.00332336	0.0759833	0.304	0.248	1
Frg1	0.000616119	0.0759507	0.229	0.17	1
Gpatch8	0.00485613	0.0758759	0.942	0.923	1
Clcn6	0.00328213	0.0758369	0.235	0.184	1
Ro60	0.00104164	0.075835	0.439	0.361	1
Tsc22d2	0.0461823	0.0758275	0.458	0.419	1
Zfp398	0.0177279	0.0757264	0.325	0.278	1
Snrpe	0.00182366	0.0756965	0.296	0.234	1
Ankrd13a	0.000221868	0.0756711	0.263	0.194	1
Pabpc4	0.00351939	0.0756451	0.299	0.244	1
Ccng2	0.00252658	0.0755637	0.266	0.211	1
Dcx	0.0126824	0.0755175	0.916	0.918	1
Fam32a	8.71141e-05	0.0754871	0.175	0.116	1
Fam171a2	0.0021907	0.0754662	0.25	0.196	1
Pnpt1	0.00287316	0.0754662	0.235	0.184	1
Ubtf	0.00111436	0.0754385	0.36	0.292	1
Sf3b6	0.000665016	0.0753652	0.23	0.171	1
Hnrnpc	0.00193987	0.0752766	0.849	0.836	1
Strn3	0.00125848	0.0752707	0.951	0.939	1
Dnajc2	0.00112528	0.0752603	0.204	0.151	1
Tomm6	0.000357574	0.0752063	0.153	0.102	1
Hnrnph1	0.00341744	0.0751859	0.911	0.892	1
E2f3	0.00750918	0.0751601	0.307	0.256	1
Ndufa8	0.00136601	0.0751514	0.19	0.14	1
Csk	0.000373177	0.0751505	0.183	0.128	1
Hadha	0.00320587	0.0750574	0.298	0.241	1
Nsrp1	0.000902969	0.075053	0.262	0.201	1
Cald1	0.00389606	0.0750434	0.442	0.375	1
Ufc1	0.00021301	0.0750354	0.157	0.104	1
Atg12	0.000748256	0.0749937	0.232	0.173	1
Mat2b	0.00281413	0.0749762	0.141	0.101	1
Psmb2	0.00609985	0.0749573	0.279	0.229	1
Adk	0.275847	0.0749573	0.194	0.18	1
Lancl1	0.00104164	0.0749499	0.262	0.202	1
Copa	0.00860826	0.0749428	0.392	0.339	1
Trim24	0.0599268	0.0749372	0.686	0.667	1
Adipor1	0.00137812	0.0749296	0.186	0.137	1
Ddah1	0.02458	0.0749213	0.265	0.226	1
Tmem33	0.00219126	0.0749004	0.266	0.21	1
Pde4b	0.0177334	0.0748352	0.144	0.11	1
Acbd5	0.0481323	0.0748144	0.465	0.435	1
Psmd7	0.00453196	0.0747854	0.351	0.294	1
Lmo4	0.0046993	0.0747532	0.338	0.279	1
Ganab	0.000540526	0.0747486	0.281	0.215	1
Tcaf1	0.0943014	0.0746169	0.76	0.781	1
Cpsf6	0.00464809	0.0745408	0.963	0.933	1
Ubxn2b	0.0250519	0.0745207	0.218	0.183	1
Crebzf	0.00083312	0.0744686	0.308	0.241	1
Pcnp	0.0131812	0.0744529	0.382	0.333	1
Grina	0.000889605	0.0744126	0.237	0.179	1
Myo9a	0.0155533	0.0743473	0.854	0.834	1
Setd1b	0.00216254	0.0743398	0.381	0.314	1
Abhd17b	0.0110339	0.0743219	0.373	0.32	1
Cltc	0.00915502	0.0742869	0.538	0.48	1
Cox20	9.44563e-05	0.0742652	0.126	0.076	1
Golga3	0.000209702	0.0742266	0.209	0.148	1
Rpl35a	0.00899427	0.0742161	0.63	0.587	1
Fbxo28	0.0191501	0.0741784	0.375	0.329	1
Zfp141	0.0111807	0.074163	0.228	0.186	1
Taf11	0.00555079	0.0741622	0.191	0.148	1
Pja2	0.036858	0.074122	0.636	0.613	1
Lbr	0.0558323	0.0741172	0.218	0.188	1
Sox2ot	0.011303	0.0740752	0.813	0.773	1
Idh1	0.00514671	0.0740006	0.349	0.294	1
Prr14	0.000672059	0.073975	0.301	0.232	1
Rab28	0.0176946	0.0739574	0.433	0.383	1
Fyttd1	0.0117531	0.0739379	0.366	0.315	1
Yy1	0.00577954	0.0739322	0.401	0.343	1
Eapp	0.000611404	0.0739268	0.229	0.17	1
Pclaf	0.00732098	0.0739012	0.22	0.175	1
Utp11	0.00214932	0.0738918	0.147	0.105	1
Arpc5	0.000288152	0.073891	0.323	0.248	1
Esco1	0.0317757	0.0738724	0.278	0.241	1
Lats1	0.00855047	0.0738645	0.348	0.298	1
Desi2	0.0112213	0.0737483	0.251	0.207	1
Got2	0.00263539	0.073727	0.26	0.206	1
Ndufb5	0.00034188	0.0737017	0.179	0.125	1
Nrd1	0.0231288	0.0737011	0.525	0.48	1
Golm1	0.013169	0.0736888	0.323	0.277	1
Paf1	0.000267384	0.0736744	0.123	0.077	1
Rnf219	5.33694e-05	0.0736557	0.176	0.114	1
Efna2	0.000639682	0.0736557	0.19	0.137	1
Ssr3	0.00160962	0.073639	0.244	0.187	1
Arl6ip6	0.00241491	0.0736063	0.304	0.244	1
Wbp2	0.00150018	0.073578	0.131	0.09	1
Txnl1	0.00358418	0.0735719	0.234	0.184	1
Tmem131	0.0340189	0.073564	0.469	0.429	1
Mob1b	0.00470907	0.073512	0.408	0.352	1
Med1	0.00729694	0.0734599	0.355	0.303	1
Chd1	0.0146844	0.0734059	0.424	0.379	1
Ccdc88a	0.00329927	0.073396	0.998	0.99	1
Hacd2	0.00179249	0.0733773	0.172	0.125	1
Supt5	0.00495484	0.0733626	0.312	0.258	1
Ahctf1	0.0079419	0.0733626	0.347	0.295	1
Taf2	0.00626623	0.0733263	0.362	0.307	1
Mzt1	0.00211336	0.0732596	0.178	0.132	1
Ndufs3	0.000365698	0.0732475	0.206	0.148	1
Lbh	0.0010542	0.0732475	0.199	0.146	1
Plekho1	0.00098726	0.0732119	0.341	0.273	1
Rpn1	0.000291084	0.0731843	0.17	0.116	1
Cbl	0.0322496	0.0731445	0.437	0.394	1
Csnk2b	5.79302e-05	0.0731269	0.116	0.067	1
Snrnp40	0.00154156	0.0731135	0.24	0.184	1
Tpm3	0.00725747	0.0730885	0.39	0.337	1
2610020C07Rik	0.0065018	0.0730661	0.24	0.194	1
Fbh1	0.00345263	0.0730487	0.216	0.167	1
Ddb1	0.00804044	0.0730385	0.348	0.298	1
Phf3	0.0661673	0.0730327	0.552	0.532	1
Ptpn2	0.00269831	0.0729518	0.284	0.229	1
Commd1	0.00249682	0.0727724	0.248	0.194	1
Selenow	0.0117114	0.0726995	0.372	0.324	1
Rsrp1	0.00225321	0.0726719	0.529	0.459	1
Mrpl23	0.000241317	0.0726578	0.14	0.09	1
Grb10	0.0427948	0.0726317	0.528	0.49	1
Atp6v1d	0.000320693	0.0726252	0.261	0.194	1
Rps6kb1	0.0217546	0.072555	0.462	0.417	1
Psmc1	0.004525	0.0725526	0.263	0.211	1
Asah1	0.00236386	0.0725052	0.198	0.148	1
Ago1	0.016705	0.0724518	0.519	0.465	1
Strip1	0.0035067	0.0724468	0.293	0.238	1
Ipp	0.000202006	0.0724057	0.13	0.082	1
Nckap5	0.674441	0.0723768	0.344	0.347	1
Actr3	0.00837604	0.0723638	0.437	0.379	1
Rbm8a	0.000204807	0.0722691	0.215	0.153	1
Efcab14	0.00351627	0.0722456	0.309	0.252	1
Smarcb1	0.00422237	0.0722038	0.299	0.246	1
Dck	0.000165584	0.0721969	0.215	0.15	1
Cirbp	0.00260197	0.0721969	0.218	0.168	1
Trappc8	0.0263136	0.0721669	0.496	0.449	1
Psma3	0.0127535	0.0721589	0.438	0.387	1
Gfpt1	0.00169151	0.0721384	0.246	0.19	1
Tmem59	0.00202763	0.0721185	0.337	0.272	1
Ppp3r1	0.00206616	0.0720788	0.209	0.159	1
Itpa	0.000262983	0.0720509	0.17	0.115	1
Rnf138	0.0155356	0.0719468	0.452	0.402	1
Prkx	0.000281438	0.0719436	0.183	0.125	1
Armcx4	0.00664126	0.071942	0.234	0.188	1
Cwc27	0.246769	0.0719088	0.434	0.418	1
Sqstm1	0.000874459	0.071891	0.17	0.12	1
Glul	0.00397541	0.0718743	0.192	0.147	1
Ercc6l2	0.0124417	0.0718608	0.243	0.198	1
Sod1	0.0105882	0.0718254	0.217	0.175	1
Cabin1	0.00613055	0.0717981	0.28	0.229	1
Gtf3c3	0.00369208	0.0717928	0.234	0.185	1
Ssr1	0.00679494	0.0717797	0.253	0.206	1
Mfn1	0.00148204	0.0717531	0.193	0.143	1
Cyth2	0.0020302	0.0717531	0.193	0.144	1
Mterf3	0.0020924	0.0717287	0.244	0.19	1
Gtf2f1	0.000417348	0.0717099	0.15	0.1	1
Micos10	0.00220311	0.0717081	0.231	0.179	1
Sec31a	0.00447362	0.0716971	0.255	0.205	1
Tmod3	0.00389418	0.0716867	0.271	0.216	1
Galnt14	0.0980378	0.0716352	0.162	0.137	1
Uqcr10	8.16349e-05	0.0716165	0.144	0.09	1
Glyr1	0.0149341	0.0716059	0.473	0.421	1
Pop1	0.000554765	0.0715213	0.127	0.083	1
Fktn	0.00741516	0.0714815	0.314	0.263	1
Ndufc1	0.000364069	0.0714711	0.22	0.16	1
Ids	0.000119331	0.0714584	0.111	0.065	1
0610012G03Rik	0.00023176	0.0714241	0.12	0.074	1
Pkn2	0.0240616	0.0714071	0.706	0.672	1
Fam76b	0.00325463	0.0713957	0.353	0.295	1
Denr	0.00400028	0.0713514	0.218	0.17	1
Ddx6	0.00609612	0.0713339	0.824	0.787	1
Zfp182	0.00331175	0.0713196	0.263	0.208	1
Ddx46	0.0155528	0.0712913	0.447	0.401	1
Uso1	0.00754919	0.0712913	0.347	0.294	1
Zfp280d	0.00986198	0.0712913	0.926	0.896	1
Tbck	0.0219398	0.071269	0.457	0.408	1
Ube4b	0.0259083	0.0712309	0.572	0.527	1
Ergic2	0.0144539	0.0712174	0.402	0.351	1
Blcap	0.000861157	0.0712102	0.332	0.263	1
Larp7	0.000532262	0.0711961	0.16	0.11	1
Tram1	0.00292765	0.0711346	0.171	0.126	1
Cacul1	0.0286884	0.0711327	0.444	0.402	1
Gpr19	0.000972367	0.0711096	0.216	0.16	1
Ctsl	4.83187e-05	0.0710547	0.104	0.057	1
Eif3b	0.00183329	0.0710236	0.225	0.172	1
Ctcf	0.175031	0.0710215	0.579	0.57	1
Dcaf17	0.0186609	0.0710177	0.298	0.256	1
Trib2	0.00107094	0.070992	0.328	0.258	1
Cttnbp2	0.333527	0.0709657	0.518	0.506	1
Comt	0.00609292	0.0709591	0.209	0.165	1
Eif5	0.0148706	0.0709429	0.497	0.449	1
Adamts6	0.0259843	0.0709406	0.194	0.159	1
Dnajc19	0.00233255	0.0708925	0.194	0.146	1
Pbrm1	0.0484651	0.0708701	0.954	0.944	1
Ninl	0.0648174	0.0708222	0.217	0.188	1
Msn	0.00829148	0.0707814	0.143	0.107	1
Ublcp1	0.00296418	0.0707555	0.226	0.175	1
Tceal9	0.00231054	0.0707082	0.292	0.233	1
Mrpl11	4.87149e-05	0.0706905	0.115	0.066	1
Arcn1	0.00460133	0.0706517	0.333	0.275	1
Ptcd3	0.00295231	0.0705284	0.28	0.225	1
Tor1aip2	0.00249107	0.0704871	0.222	0.17	1
Timmdc1	0.004277	0.0704839	0.259	0.207	1
Senp2	0.00426737	0.0704557	0.322	0.265	1
Pus10	0.00488741	0.0704333	0.319	0.264	1
Uba1	0.00307737	0.0703893	0.424	0.355	1
Rock1	0.00641299	0.0703398	0.759	0.751	1
Cdk5rap2	0.114548	0.0702769	0.27	0.247	1
Brk1	0.000355274	0.0702656	0.223	0.161	1
Alg10b	0.00457857	0.0702613	0.178	0.135	1
Drap1	6.90736e-05	0.0702567	0.15	0.094	1
Wdr43	0.00814478	0.0702509	0.263	0.215	1
Abcd3	0.0190775	0.0702509	0.261	0.22	1
Ankrd50	0.000881487	0.0701719	0.238	0.179	1
Gpm6a	0.208062	0.0701118	0.821	0.816	1
Pigx	0.000776293	0.0700949	0.225	0.167	1
Pcsk7	0.00121219	0.0700499	0.241	0.183	1
Cyhr1	0.00049197	0.0700026	0.182	0.128	1
Ywhaq	0.0410803	0.0699259	0.731	0.712	1
Kdelr1	0.00104335	0.0699114	0.196	0.142	1
Ap2s1	0.00240434	0.0699114	0.199	0.15	1
BC004004	0.00124065	0.0698893	0.203	0.15	1
Ifrd1	0.0147935	0.0698053	0.17	0.134	1
Serpini1	0.00679344	0.069802	0.194	0.151	1
Ccdc127	0.000509654	0.0697622	0.157	0.106	1
Schip1	0.0924013	0.0697411	0.166	0.14	1
Hipk1	0.00158802	0.0697233	0.299	0.237	1
Matr3	0.0680637	0.069667	0.59	0.552	1
Mrpl52	0.000966941	0.069659	0.236	0.178	1
Krit1	0.0667723	0.0696401	0.652	0.638	1
Gtpbp10	0.000192915	0.0696009	0.12	0.073	1
Crb1	0.264309	0.0696	0.155	0.139	1
Gmps	0.0145667	0.0695993	0.337	0.289	1
Actr10	0.00340428	0.0695874	0.286	0.232	1
Aamp	0.000821287	0.0695659	0.175	0.124	1
Tmem167	0.00404459	0.0695152	0.37	0.31	1
Epm2aip1	0.00337473	0.0694091	0.224	0.174	1
St7l	0.0187015	0.0694007	0.42	0.372	1
Zfp605	0.000524259	0.0693993	0.139	0.092	1
Cdk7	0.00284286	0.0693663	0.314	0.255	1
Retreg3	0.00104131	0.069354	0.252	0.192	1
H2afj	0.000314809	0.0692614	0.135	0.087	1
Rrm2b	0.00227634	0.0692614	0.125	0.086	1
Ppig	0.0353188	0.0692501	0.517	0.483	1
Pitpnb	0.00302647	0.0691838	0.301	0.244	1
Ankra2	0.00426597	0.0691557	0.212	0.164	1
Mafg	0.000614686	0.0691132	0.185	0.131	1
Tmem106b	0.00080474	0.0690957	0.194	0.14	1
Gnai3	0.0361812	0.0690278	0.379	0.344	1
Zc3hav1l	0.00110024	0.0690148	0.173	0.124	1
Fam76a	0.00411557	0.0689639	0.183	0.138	1
Ppp3cb	0.0553848	0.0689561	0.706	0.7	1
2210016L21Rik	0.000534802	0.0689474	0.141	0.094	1
Mrpl24	0.00145649	0.0689301	0.141	0.098	1
Zfp369	0.0132928	0.0689179	0.29	0.243	1
Zfp146	0.00365167	0.0688963	0.155	0.113	1
Flywch1	0.0256639	0.0688941	0.384	0.341	1
Tiprl	0.00095634	0.0688312	0.184	0.132	1
Eif2b5	0.00120862	0.0688312	0.184	0.133	1
Nmt2	0.0155843	0.0688126	0.368	0.319	1
Znhit1	0.00132349	0.0687595	0.153	0.107	1
Aco2	0.00143339	0.068693	0.35	0.283	1
Eed	0.00625016	0.0686102	0.205	0.16	1
Eif4g1	0.0130352	0.0685244	0.518	0.463	1
Plpp3	0.038965	0.0685208	0.137	0.11	1
Ndufa11	9.68137e-05	0.0685117	0.135	0.083	1
Mta1	0.000748703	0.0685071	0.202	0.147	1
Serf1	0.00179526	0.0685071	0.203	0.152	1
Prc1	0.0111571	0.0685071	0.165	0.127	1
Brsk2	0.00296355	0.0684876	0.333	0.274	1
Akirin1	0.00506114	0.0684283	0.233	0.184	1
Tnfaip1	0.000766158	0.068414	0.183	0.13	1
Tbc1d13	0.000523527	0.0683747	0.206	0.148	1
Parg	0.00766476	0.068362	0.46	0.401	1
Prkacb	0.016687	0.0683602	0.519	0.464	1
Rnf139	0.000174279	0.0683431	0.143	0.091	1
Mns1	0.000518116	0.0682536	0.1	0.06	1
Immp1l	0.0011624	0.0682422	0.256	0.195	1
Ndufb1-ps	0.0035896	0.0682294	0.198	0.151	1
Ndn	0.0391013	0.0682294	0.171	0.14	1
Gpc2	0.015165	0.0682254	0.442	0.391	1
Cenpc1	0.0695155	0.0681949	0.355	0.325	1
Chmp2a	0.000127033	0.0681776	0.156	0.101	1
Nap1l4	0.00905863	0.0681577	0.403	0.348	1
Rhou	0.00086521	0.0681186	0.181	0.129	1
Odr4	0.00704962	0.0681186	0.178	0.137	1
Pex13	0.000911636	0.0681169	0.26	0.196	1
Micos13	5.5219e-05	0.0680839	0.129	0.077	1
Gpr137b	0.000141114	0.0680839	0.124	0.075	1
Tmem263	0.000127344	0.0680721	0.132	0.082	1
Bmt2	0.00894919	0.0680692	0.386	0.329	1
Cdc34	8.3115e-05	0.0680604	0.14	0.087	1
Rnf14	0.00282635	0.0680554	0.295	0.237	1
Tcf7l2	0.015235	0.0680524	0.15	0.114	1
Crkl	0.00184894	0.0680488	0.373	0.304	1
Sav1	0.00124393	0.0680488	0.14	0.096	1
Gm37240	0.0017641	0.0680488	0.142	0.099	1
Ccz1	0.0175609	0.0680456	0.288	0.244	1
Cops8	0.000731303	0.0680374	0.149	0.101	1
Ago2	0.0247623	0.0679699	0.376	0.334	1
Orc6	0.00665556	0.0679411	0.193	0.151	1
Fads1	0.00136374	0.0679112	0.225	0.17	1
Mn1	0.00903745	0.067854	0.324	0.272	1
Gabarapl1	0.000352047	0.0677638	0.139	0.09	1
Dnajc14	0.00228516	0.0677541	0.139	0.098	1
Lmbrd2	0.0108132	0.0677525	0.315	0.263	1
Hdlbp	0.00992199	0.0677446	0.313	0.264	1
Trim67	0.00201792	0.0677352	0.151	0.107	1
Zfp652	0.0525468	0.0677213	0.528	0.494	1
Lgr4	0.0129496	0.0677168	0.137	0.102	1
Ndufs5	0.00112519	0.0676813	0.191	0.139	1
Arid3a	0.000299424	0.0676023	0.147	0.097	1
Nus1	0.00143184	0.0675528	0.186	0.136	1
Atxn7l3	0.000737298	0.0674146	0.185	0.132	1
Pdia4	0.00559178	0.0673669	0.216	0.169	1
Mtmr9	0.00616787	0.0673352	0.254	0.206	1
Impad1	0.00336462	0.0673033	0.389	0.323	1
Togaram1	0.00639684	0.0672151	0.342	0.288	1
Mbd3	0.0144461	0.0672001	0.243	0.2	1
Rraga	7.46352e-05	0.0671992	0.1	0.056	1
Zfp236	0.00662772	0.0671961	0.377	0.321	1
Gt(ROSA)26Sor	0.000154721	0.0671869	0.116	0.07	1
Adgra3	0.0171543	0.06714	0.285	0.242	1
Ube2i	0.00826286	0.0671194	0.452	0.399	1
Pbx2	0.00878168	0.0670749	0.248	0.201	1
Fgf13	0.417136	0.0670619	0.715	0.706	1
Ergic1	0.0112861	0.0670522	0.267	0.22	1
Rnf11	0.00262878	0.0670478	0.274	0.217	1
Tmed10	0.00242483	0.0669837	0.348	0.283	1
Kif5b	0.069817	0.0669555	0.683	0.673	1
Phtf1	0.00266826	0.0669326	0.416	0.346	1
Zbtb44	0.00165535	0.0669208	0.27	0.21	1
Ubfd1	0.00081981	0.0668709	0.131	0.087	1
Smim7	0.00265337	0.066867	0.139	0.098	1
Mtfr1	0.00737314	0.0668632	0.136	0.1	1
Me2	0.0334249	0.0668484	0.152	0.122	1
Ildr2	0.0217216	0.0668378	0.139	0.107	1
Fam8a1	0.00235632	0.0668343	0.194	0.146	1
Bmpr1b	0.0228454	0.0668343	0.116	0.087	1
Rbm18	0.00410458	0.0668019	0.257	0.205	1
Rab8b	0.0038057	0.0667677	0.313	0.254	1
Ift52	0.00394193	0.0666929	0.187	0.14	1
Vps33a	0.00174319	0.0666878	0.215	0.162	1
Zdhhc5	0.00801376	0.0666829	0.219	0.175	1
Rfx3	0.025894	0.066652	0.936	0.913	1
Ap2b1	0.0570564	0.0665932	0.659	0.64	1
Mrpl43	0.000464789	0.0665743	0.126	0.081	1
Eloa	0.000711403	0.0665704	0.138	0.092	1
Derl1	0.000667587	0.0665629	0.165	0.113	1
Slc38a9	0.0837114	0.0665473	0.532	0.495	1
Stx16	0.0149141	0.0664851	0.444	0.39	1
Ccdc124	0.000174277	0.0664233	0.129	0.08	1
Cetn3	0.00365917	0.0664141	0.19	0.144	1
Map1lc3b	0.000845156	0.0664115	0.218	0.16	1
Calu	0.0055861	0.0664107	0.212	0.166	1
Bag1	0.00291504	0.0662732	0.186	0.139	1
Lin7c	0.00153021	0.0662732	0.259	0.199	1
Ccnl1	0.0269379	0.0662732	0.45	0.398	1
Sox9	0.0581653	0.0662732	0.278	0.246	1
Lmo1	0.00147231	0.0661484	0.238	0.182	1
Zfp24	0.00311628	0.066147	0.3	0.242	1
Hspe1	0.0020711	0.0661396	0.24	0.186	1
Brf1	0.00965973	0.0661381	0.229	0.185	1
Trim59	0.00525385	0.0661373	0.198	0.152	1
Kif18a	0.0634859	0.0661287	0.101	0.079	1
Zkscan8	0.00036967	0.0661259	0.151	0.1	1
Pnmal1	0.00154868	0.0661259	0.147	0.103	1
Sc5d	0.000491955	0.066124	0.136	0.089	1
Agpat1	0.000207596	0.066121	0.114	0.069	1
Armcx3	0.000834594	0.066121	0.11	0.07	1
Tomm70a	0.00467474	0.0660441	0.377	0.317	1
Mia2	0.00142264	0.0660228	0.301	0.238	1
Zfp942	0.00207464	0.066002	0.223	0.17	1
Armcx2	0.00159992	0.0659831	0.162	0.116	1
Gpx1	0.000407396	0.0659794	0.154	0.103	1
H2afv	0.00981123	0.0659656	0.47	0.41	1
Jkamp	0.0407775	0.065916	0.346	0.306	1
2610507B11Rik	0.00319475	0.0658943	0.287	0.229	1
Pcdh10	0.127897	0.0658675	0.159	0.137	1
Prep	0.00137586	0.0658551	0.199	0.146	1
Txndc9	0.00425561	0.0658551	0.203	0.156	1
Rwdd1	0.00514746	0.06585	0.183	0.139	1
Ndufs6	0.000250461	0.0658337	0.156	0.103	1
Polr2i	0.000516504	0.0658192	0.121	0.077	1
G3bp2	0.00348258	0.0658119	0.573	0.499	1
Cask	0.0377499	0.0658065	0.797	0.759	1
Snrpd1	0.015971	0.0657636	0.275	0.231	1
Hat1	0.0281894	0.0657608	0.232	0.194	1
Fkbp4	0.0155959	0.065752	0.257	0.215	1
Chmp3	0.00719791	0.065749	0.254	0.206	1
Rrbp1	0.001557	0.0657399	0.244	0.186	1
Hsph1	0.0035571	0.0657138	0.192	0.146	1
Atp5g1	0.00143877	0.0657069	0.178	0.129	1
Bcl7c	0.00261384	0.0657034	0.179	0.133	1
Sept3	0.0558848	0.0656774	0.614	0.586	1
Gm26936	0.000236505	0.0656696	0.125	0.078	1
Srrt	0.00735518	0.0656196	0.261	0.212	1
Dpf2	0.00270326	0.0655964	0.239	0.187	1
Kmt2b	0.00758065	0.0655883	0.215	0.171	1
Zfp780b	0.00344522	0.0655494	0.16	0.117	1
Ndufc2	6.35648e-05	0.0655401	0.15	0.093	1
Ube2j1	0.00111175	0.0654772	0.265	0.203	1
Vps36	0.00891875	0.0654535	0.209	0.166	1
Ostm1	0.00215095	0.0654213	0.455	0.383	1
Jade3	0.0134025	0.065407	0.304	0.256	1
Ybx3	0.0244746	0.0653959	0.135	0.105	1
Pdk3	0.0114682	0.0652717	0.154	0.117	1
Ociad1	0.00156531	0.0652526	0.294	0.231	1
Snu13	0.00075639	0.0652394	0.14	0.094	1
6030442K20Rik	0.0016416	0.065219	0.121	0.081	1
Nlk	0.412473	0.065187	0.962	0.96	1
Kmt2a	0.0138831	0.0651587	0.819	0.813	1
Uri1	0.0347561	0.0651416	0.369	0.328	1
Sgo2a	0.0342487	0.065095	0.116	0.09	1
Pde3b	0.40331	0.06509	0.42	0.419	1
Sept1	0.00715638	0.0650814	0.246	0.198	1
Arglu1	0.0283438	0.0650639	0.808	0.787	1
Pja1	0.00185441	0.0650532	0.236	0.181	1
Cep128	0.0721363	0.0649965	0.214	0.184	1
H2afx	0.00082322	0.0649343	0.135	0.09	1
Podxl2	0.00270182	0.064887	0.391	0.324	1
Ppid	0.00238145	0.0648272	0.161	0.117	1
Retreg2	0.000169984	0.0647897	0.144	0.092	1
Naa35	0.0064542	0.0647618	0.459	0.394	1
Fam122a	8.99452e-05	0.0647603	0.122	0.072	1
Wbp1	0.00461715	0.064757	0.303	0.247	1
Wdr82	0.00212084	0.0646778	0.25	0.194	1
Thoc1	0.00775058	0.0646631	0.379	0.325	1
Nup153	0.0345877	0.0645689	0.374	0.333	1
2410018L13Rik	0.00166176	0.0644978	0.217	0.163	1
Pdzrn4	0.0100931	0.0644978	0.155	0.116	1
Dpp3	0.0202271	0.0644871	0.205	0.168	1
Ythdf1	0.00151649	0.0644654	0.207	0.154	1
Hba-x	0.231483	0.0644544	0.109	0.094	1
Snw1	0.0144049	0.0644528	0.256	0.212	1
Irs2	0.00901845	0.0643077	0.182	0.141	1
Ints2	0.00106409	0.0642811	0.37	0.297	1
Zfp74	0.00134059	0.0642583	0.168	0.119	1
Ncoa3	0.00498212	0.0642146	0.271	0.217	1
Nop14	0.0012227	0.0641929	0.136	0.092	1
Nars	0.00219641	0.0641729	0.194	0.145	1
Gm20732	0.0362518	0.0641673	0.238	0.204	1
Mras	0.000977734	0.0641303	0.24	0.18	1
Slc7a6	0.0064896	0.0641303	0.233	0.185	1
Sf3b5	0.000439626	0.0641232	0.103	0.062	1
Ap4m1	0.00128857	0.0641203	0.168	0.119	1
Nmt1	0.0134631	0.0641155	0.287	0.239	1
Prelid1	0.00214494	0.0641067	0.168	0.122	1
Tpd52l2	0.00294228	0.0641067	0.168	0.123	1
Psmc4	0.000720188	0.064079	0.153	0.104	1
Azin1	0.0295564	0.0640313	0.3	0.256	1
Cox7b	0.0177544	0.0640154	0.238	0.197	1
Vmp1	0.019117	0.0640066	0.42	0.372	1
Brms1l	0.0140439	0.0640022	0.231	0.188	1
Bend5	0.000152845	0.0639916	0.12	0.072	1
Smad5	0.0150481	0.0639801	0.385	0.335	1
Hic2	0.0122342	0.0639754	0.225	0.183	1
Rap2a	0.000771114	0.0639686	0.17	0.119	1
Gkap1	0.0746107	0.0639501	0.281	0.25	1
Smndc1	0.00638916	0.0639479	0.217	0.17	1
Traf4	0.0046412	0.0639392	0.151	0.11	1
Rac1	0.00119958	0.0639293	0.282	0.217	1
Prpf6	0.0236855	0.0638994	0.301	0.259	1
Glrx2	0.00443872	0.0638002	0.157	0.116	1
Zfp40	0.0140146	0.0637391	0.283	0.237	1
Cenpb	0.000563662	0.0637022	0.12	0.076	1
Slc35a1	0.00609511	0.0636947	0.173	0.131	1
Smarcc1	0.0166278	0.0636839	0.934	0.915	1
Cnih4	0.00767584	0.0636784	0.167	0.127	1
Trmt6	0.00326183	0.0636454	0.156	0.113	1
Taf6	0.012124	0.0636249	0.189	0.149	1
Spindoc	0.0050317	0.063602	0.341	0.281	1
Rps12	0.0155369	0.0635788	0.84	0.82	1
Sde2	0.00368489	0.0635766	0.124	0.087	1
Agrn	0.0165948	0.0635712	0.468	0.417	1
Lsm14b	0.006519	0.0635588	0.324	0.269	1
Mtx1	0.000256191	0.0635408	0.12	0.074	1
Chd2	0.0134476	0.0635293	0.929	0.915	1
Scrt2	0.00635381	0.0635263	0.217	0.171	1
Smarcal1	0.000396092	0.0635071	0.16	0.108	1
1500004A13Rik	0.00894902	0.0634759	0.487	0.427	1
Nudt4	0.00197541	0.0634421	0.317	0.254	1
Selenoh	0.000220046	0.0634414	0.185	0.125	1
Rnf146	0.0126869	0.0634366	0.275	0.229	1
Mir670hg	0.000874099	0.063351	0.145	0.098	1
Zfp2	0.0269598	0.0633439	0.196	0.161	1
Med13	0.226982	0.0633349	0.745	0.76	1
Sugt1	0.0290033	0.0633259	0.321	0.277	1
Zfp81	0.0294211	0.0633202	0.229	0.193	1
Ttc3	0.00418907	0.0633196	0.999	0.991	1
Thap12	0.0151823	0.0632707	0.169	0.133	1
Slc30a5	0.00981447	0.0632493	0.201	0.159	1
Nup88	0.00930467	0.0632469	0.254	0.207	1
Myo18a	0.0189345	0.0632347	0.478	0.42	1
Rbm3	0.00411292	0.0632103	0.329	0.271	1
Flrt2	0.348052	0.0632103	0.146	0.132	1
Samd10	0.000144478	0.0631938	0.103	0.059	1
Lrrn1	0.0227504	0.0631433	0.25	0.209	1
Raly	0.0142713	0.0631011	0.209	0.169	1
Ddx52	0.00442745	0.0630766	0.154	0.113	1
Chmp1b	5.23234e-05	0.0630493	0.108	0.06	1
Fut8	0.20172	0.0630493	0.376	0.359	1
Haus6	0.00663511	0.0630427	0.173	0.132	1
Prkcsh	0.00109432	0.0629615	0.166	0.117	1
Rtcb	0.00693786	0.0629615	0.166	0.125	1
Elavl3	0.0228075	0.0629496	0.985	0.975	1
Tax1bp3	6.96735e-05	0.062928	0.121	0.071	1
Lamp2	0.013226	0.0629024	0.322	0.274	1
Pcif1	0.000436129	0.0628978	0.156	0.105	1
Cycs	0.000362996	0.062854	0.137	0.088	1
Plagl2	0.00619802	0.0628484	0.175	0.133	1
Atrip	0.000577714	0.062809	0.127	0.083	1
Tsc22d1	0.0121744	0.0627657	0.893	0.872	1
Tmem128	0.000101806	0.0627628	0.113	0.066	1
Ier3ip1	0.00214891	0.0627609	0.147	0.104	1
Lrrc47	9.89726e-05	0.0627393	0.108	0.062	1
Tmem260	0.00749357	0.062735	0.281	0.229	1
Adgrb3	0.593032	0.0627154	0.604	0.633	1
Sms	0.0389595	0.0626593	0.314	0.273	1
Zfp697	0.0136413	0.0626426	0.356	0.302	1
Pou3f2	0.201223	0.0626322	0.345	0.323	1
Psmd8	0.00102215	0.0626283	0.196	0.141	1
Notch3	0.00320937	0.0625293	0.108	0.072	1
Creb1	0.0647235	0.0625172	0.71	0.7	1
Ppp2r2d	0.00890854	0.0624796	0.283	0.232	1
Gm7072	0.00184469	0.0624277	0.178	0.13	1
Slc30a9	0.0797725	0.0624157	0.377	0.348	1
Atp6ap1	0.00597693	0.0624157	0.138	0.101	1
Usf1	0.00189462	0.0624037	0.176	0.129	1
Entr1	0.00655385	0.0623924	0.21	0.165	1
Nipsnap2	0.0474889	0.062384	0.283	0.247	1
Ttc9c	0.00247022	0.0623448	0.194	0.145	1
Bend4	0.00506434	0.0623448	0.187	0.142	1
Slbp	0.00482935	0.0623206	0.177	0.133	1
Tasor	0.0744751	0.0623043	0.568	0.544	1
Sox3	0.000592018	0.0622866	0.101	0.062	1
Washc2	0.0432246	0.0622682	0.298	0.259	1
Synrg	0.0808224	0.0622384	0.585	0.559	1
Wdr6	0.0143072	0.0622014	0.297	0.25	1
Eif3i	0.00171808	0.0621949	0.158	0.112	1
Tmem181a	0.00907591	0.0621688	0.143	0.107	1
Acsl3	0.00326091	0.0621618	0.214	0.163	1
Rnf114	0.000816858	0.062137	0.22	0.163	1
Nckap1	0.0198716	0.0621246	0.609	0.571	1
Pih1d1	5.6907e-05	0.0621176	0.107	0.06	1
Zdhhc17	0.00848102	0.0620944	0.584	0.527	1
Ldhb	0.00491371	0.062085	0.269	0.216	1
Cdc23	0.00404369	0.062061	0.231	0.18	1
Oxsr1	0.00223693	0.0620341	0.152	0.108	1
Iscu	7.65583e-05	0.0620049	0.116	0.067	1
Neb	0.00868811	0.061982	0.139	0.103	1
Nfat5	0.172383	0.0619298	0.743	0.756	1
Lmtk2	0.0649963	0.0619277	0.326	0.297	1
Atp6v1e1	0.022842	0.0618704	0.266	0.225	1
Rex1bd	0.000471395	0.0618653	0.118	0.074	1
Ddx42	0.0163002	0.0618627	0.526	0.473	1
Pnmal2	0.00180192	0.0618041	0.198	0.146	1
Lig3	0.0404706	0.0617858	0.215	0.183	1
Bdp1	0.04011	0.0617662	0.481	0.442	1
Efcab7	0.00664075	0.0617489	0.175	0.133	1
Suz12	0.324254	0.0617403	0.56	0.56	1
Gdap1l1	0.00573366	0.0617319	0.207	0.161	1
Kif3b	0.0530415	0.0617264	0.254	0.223	1
Aff2	0.173193	0.0617122	0.877	0.858	1
Dpysl4	0.00414777	0.0617044	0.208	0.16	1
Gpat4	0.0508963	0.061697	0.309	0.274	1
Idh3g	0.000232373	0.0616961	0.114	0.069	1
Slirp	0.000549796	0.0616961	0.11	0.068	1
Cul1	0.0358261	0.0616818	0.522	0.485	1
Svbp	0.00300145	0.0616635	0.163	0.119	1
Ice1	0.0211934	0.0616343	0.327	0.281	1
Hnrnpul1	0.0257312	0.0616013	0.417	0.371	1
Hif1a	0.0140557	0.0615722	0.47	0.416	1
Arpc2	0.00309237	0.0615662	0.408	0.338	1
Armc1	0.00465506	0.0615103	0.225	0.176	1
Mmadhc	0.000697745	0.0615025	0.166	0.114	1
Pspc1	0.380426	0.0614882	0.691	0.692	1
Timm17b	0.000599934	0.0614192	0.119	0.075	1
Sart1	0.00125204	0.0614104	0.145	0.1	1
Ntmt1	0.00680313	0.0614021	0.173	0.132	1
Tsg101	0.185539	0.0613973	0.49	0.471	1
Ddx21	0.0489071	0.0613514	0.228	0.195	1
Mpdz	0.0409607	0.0613193	0.31	0.271	1
Mpv17	0.00105187	0.0613147	0.126	0.083	1
Nfyb	0.00987659	0.0612984	0.208	0.165	1
Arl5b	0.0431246	0.0612942	0.366	0.328	1
Pfdn4	0.000101828	0.0612488	0.115	0.067	1
Capns1	0.000862096	0.0612122	0.136	0.09	1
Usp22	0.00785995	0.0612067	0.466	0.406	1
Akap8	0.0147437	0.061169	0.29	0.242	1
Ncam1	0.041416	0.0610933	0.981	0.967	1
Cntnap5c	0.0330336	0.0610877	0.185	0.151	1
Knop1	0.0029298	0.061083	0.299	0.24	1
Ap5m1	0.0035315	0.0610799	0.194	0.147	1
Rps13	0.0138128	0.0610018	0.637	0.61	1
Fgfr1op	0.0255206	0.0609826	0.163	0.131	1
Washc4	0.021928	0.0609819	0.38	0.335	1
Safb	0.01172	0.0609789	0.364	0.314	1
1110038B12Rik	0.00631857	0.0609493	0.163	0.123	1
Stau1	0.0604188	0.0609322	0.382	0.344	1
1600010M07Rik	0.00132089	0.06091	0.135	0.091	1
Psmd12	0.00910502	0.0608995	0.231	0.185	1
Atp6v1h	0.0178915	0.0608728	0.443	0.387	1
Wars	0.00098704	0.0608471	0.156	0.108	1
Arl6ip5	0.00351624	0.0608471	0.149	0.107	1
Dync1li1	0.00525372	0.0608318	0.543	0.476	1
Calb1	0.121256	0.0608099	0.215	0.188	1
Dmxl1	0.0438908	0.0608075	0.738	0.729	1
Txlna	0.0119541	0.0607793	0.239	0.195	1
Dpp10	0.847808	0.060729	0.111	0.114	1
Zswim4	0.00316847	0.0607142	0.234	0.182	1
Cebpz	0.0297839	0.0607142	0.216	0.18	1
Inip	0.00197704	0.0606476	0.214	0.16	1
Nkap	0.00323524	0.0606267	0.234	0.181	1
Zbtb12	0.00542281	0.0605856	0.155	0.115	1
Actr1b	0.000638607	0.0605703	0.127	0.083	1
Fkbp8	0.010135	0.0605596	0.23	0.186	1
Fat1	0.145831	0.0605406	0.194	0.173	1
Ints14	0.00695503	0.0605095	0.19	0.147	1
Amer1	0.00764503	0.0604739	0.184	0.142	1
Mtmr6	0.0120627	0.060473	0.234	0.19	1
Rab21	0.00341348	0.0604559	0.297	0.24	1
Nop53	0.00685269	0.0604559	0.156	0.117	1
Zc3h12c	0.154233	0.0604452	0.557	0.539	1
Gm42439	0.000150879	0.0604167	0.103	0.059	1
G3bp1	0.127055	0.0604167	0.459	0.441	1
Gatad1	0.00274881	0.0604039	0.221	0.168	1
Arl8b	0.00529243	0.0603579	0.278	0.224	1
Mrpl34	0.000154164	0.0602651	0.13	0.08	1
Gna11	0.00364526	0.0601742	0.207	0.159	1
Bace1	0.00426662	0.0601742	0.204	0.156	1
Celsr2	0.00548099	0.0601669	0.342	0.283	1
Zfp317	0.00558217	0.0601601	0.157	0.117	1
Anapc15	0.000334782	0.0601445	0.107	0.064	1
Ndufa7	0.00262101	0.060137	0.201	0.151	1
9530068E07Rik	0.00754699	0.0601325	0.12	0.086	1
Stub1	0.012995	0.0601262	0.218	0.176	1
Zdhhc9	0.00423268	0.06011	0.174	0.13	1
Usp12	0.0047302	0.0600712	0.163	0.121	1
Palm	0.0171154	0.0600288	0.34	0.29	1
Pigk	0.0055602	0.059976	0.194	0.149	1
Tesk1	0.000141376	0.0599675	0.108	0.063	1
Ptges3	0.0169018	0.0599524	0.421	0.371	1
Atp11b	0.00917378	0.0599502	0.343	0.287	1
Sfr1	0.00261182	0.059924	0.225	0.172	1
D8Ertd738e	0.000985239	0.0599043	0.171	0.121	1
Bag4	0.0209264	0.0599043	0.153	0.12	1
Anp32e	0.016615	0.0598849	0.348	0.298	1
Rchy1	0.0116681	0.0598055	0.236	0.192	1
2510009E07Rik	0.0153448	0.0598055	0.232	0.19	1
Zfp219	0.0307352	0.0597705	0.205	0.171	1
Srp14	0.00125703	0.0597391	0.137	0.093	1
Sv2a	0.00504268	0.0597363	0.155	0.114	1
Tm9sf4	0.0769353	0.0597238	0.245	0.215	1
Tbca	0.0234908	0.0597216	0.263	0.221	1
Emc8	0.00857049	0.0596927	0.171	0.131	1
Strap	0.0346347	0.0596893	0.212	0.177	1
Vegfa	0.00194932	0.0596533	0.125	0.085	1
Tbc1d14	0.0351551	0.0596496	0.201	0.167	1
Panx1	0.0098274	0.059648	0.25	0.203	1
Mtrex	0.0281465	0.0596433	0.365	0.322	1
Csnk1a1	0.0155823	0.0596252	0.897	0.872	1
Reep2	0.000744393	0.0596095	0.142	0.095	1
Ankrd11	0.0877523	0.0596095	0.853	0.846	1
Nolc1	0.0185574	0.059568	0.168	0.133	1
Sec24a	0.0293866	0.0595355	0.275	0.235	1
Mrpl20	0.000539398	0.0595222	0.126	0.081	1
Wapl	0.191183	0.0594811	0.583	0.579	1
Arfgap2	0.0022337	0.0594806	0.146	0.103	1
Prmt1	0.00500455	0.0594627	0.298	0.24	1
Taf7	0.00020394	0.0593868	0.108	0.063	1
Wdr47	0.0596006	0.0593831	0.379	0.343	1
Zfp553	0.00066726	0.0593684	0.215	0.156	1
AW549877	0.0140536	0.0593684	0.209	0.169	1
Trappc4	0.00857267	0.0593633	0.189	0.148	1
Rint1	0.0012562	0.0593265	0.205	0.151	1
U2af2	0.0196491	0.0593265	0.201	0.163	1
Ehbp1	0.0239857	0.0593205	0.754	0.727	1
Nploc4	0.0180583	0.0593093	0.272	0.229	1
Dkc1	0.00166148	0.0592771	0.176	0.127	1
Ipo11	0.131563	0.0592643	0.401	0.383	1
Rfc4	0.00606521	0.0592543	0.1	0.068	1
Rpl7l1	0.00192631	0.0592332	0.172	0.125	1
Larp1	0.0555033	0.0592185	0.394	0.351	1
Lrrcc1	0.00589646	0.0592118	0.384	0.319	1
Rbm17	0.00641269	0.0592063	0.209	0.163	1
Rhbdd2	0.0108203	0.0591794	0.136	0.102	1
Bivm	0.00416921	0.0591697	0.113	0.078	1
Asb7	0.0556831	0.0591267	0.274	0.24	1
Psme3	0.000841677	0.0591225	0.114	0.073	1
App	0.24258	0.0591092	0.687	0.691	1
Rnf168	0.00955322	0.0591075	0.241	0.194	1
Use1	0.000441847	0.0590747	0.109	0.067	1
Ccdc12	0.00361925	0.0590546	0.224	0.174	1
Brix1	0.00527682	0.059052	0.142	0.103	1
Atrnl1	0.182376	0.0590351	0.817	0.809	1
Gan	0.00191557	0.0590184	0.166	0.119	1
Sptbn1	0.0545352	0.0589953	0.681	0.651	1
Ythdf3	0.220131	0.0589673	0.683	0.677	1
Sel1l	0.0058219	0.0589192	0.358	0.294	1
Ttf1	0.00537918	0.0589089	0.183	0.139	1
Rnf19a	0.0066188	0.0588688	0.376	0.319	1
Map7d1	0.0105223	0.0588538	0.321	0.268	1
Pdzd8	0.0588826	0.0588517	0.244	0.211	1
Ergic3	0.00548644	0.0588468	0.159	0.118	1
Adh5	0.00659588	0.0588468	0.15	0.111	1
Tcf25	0.0249451	0.0588468	0.432	0.381	1
Dnajb11	0.000436248	0.0588297	0.138	0.09	1
Snx1	0.00925784	0.0588093	0.259	0.21	1
Zfp800	0.262697	0.0587984	0.233	0.217	1
Zfp334	0.00301211	0.0587875	0.193	0.145	1
Gm26944	0.00606418	0.0587875	0.188	0.144	1
Ikzf5	0.000172279	0.058781	0.136	0.085	1
Smim4	0.000549335	0.0587592	0.206	0.147	1
Cep83	0.0130237	0.058709	0.363	0.312	1
Zfp983	0.012665	0.0587023	0.132	0.099	1
Hnrnpul2	0.116693	0.05869	0.281	0.256	1
Ssna1	0.000838188	0.0586817	0.116	0.075	1
Nek7	0.0159525	0.0586739	0.128	0.096	1
Onecut2	0.0766329	0.0586723	0.226	0.195	1
Mlxip	0.0181551	0.0586054	0.28	0.237	1
Ubr7	0.00902417	0.0585757	0.13	0.095	1
Ugcg	0.0442077	0.0585441	0.221	0.189	1
Nck1	0.0221945	0.0585357	0.337	0.29	1
Terf1	0.206733	0.0585189	0.223	0.204	1
2410004B18Rik	0.000646658	0.0585008	0.113	0.071	1
Polr3k	0.00967573	0.0584748	0.202	0.16	1
Pds5b	0.141387	0.0584506	0.725	0.714	1
Zfp408	0.00774104	0.0584497	0.14	0.103	1
Fam89b	0.000253733	0.0584254	0.167	0.111	1
Ankrd12	0.0940696	0.0584123	0.677	0.654	1
Gns	0.00480308	0.0584043	0.206	0.159	1
Cops6	0.00139771	0.058399	0.141	0.097	1
Srsf10	0.475613	0.0583639	0.511	0.534	1
Shh	0.0249941	0.0583607	0.214	0.175	1
Mrfap1	0.00369896	0.058335	0.218	0.168	1
Ulk4	0.0135633	0.0583141	0.206	0.164	1
Eif3j1	0.00336221	0.0582937	0.241	0.188	1
Pik3r1	0.0326744	0.0582546	0.241	0.204	1
Ogfrl1	0.0138193	0.0582427	0.105	0.075	1
Gab2	0.192536	0.0582257	0.429	0.417	1
Tm2d1	0.0134875	0.0582192	0.216	0.174	1
Idh2	0.00458021	0.0581909	0.285	0.229	1
Parp11	0.00759164	0.0581909	0.277	0.226	1
Slc39a9	0.0208013	0.0581901	0.191	0.154	1
Smim10l1	0.00555706	0.0581795	0.165	0.123	1
Oxr1	0.030537	0.0581709	0.2	0.165	1
Pigp	0.0122398	0.0581598	0.172	0.134	1
Syn2	0.0232271	0.058109	0.144	0.111	1
Timm22	0.00147707	0.0580416	0.131	0.089	1
Agpat4	0.0261331	0.0580209	0.28	0.237	1
Zyg11b	0.0803789	0.0580056	0.58	0.533	1
Cog3	0.00934839	0.05799	0.28	0.229	1
Fbxo30	0.00637332	0.0579717	0.183	0.14	1
Kctd5	0.000812367	0.0579699	0.141	0.094	1
Mob3b	0.114411	0.057958	0.184	0.16	1
Kdm1a	0.081838	0.0579429	0.811	0.798	1
BC031181	0.0143148	0.0579398	0.221	0.179	1
Tbk1	0.0381105	0.0578337	0.259	0.221	1
Nup188	0.041195	0.0578116	0.221	0.187	1
Ubac1	0.000234595	0.0578054	0.123	0.075	1
Hdac1	0.0313112	0.0578046	0.341	0.3	1
Dpm1	0.0186417	0.0577984	0.253	0.212	1
Sdhc	0.0277676	0.0577984	0.25	0.21	1
Clint1	0.050822	0.0577694	0.405	0.36	1
Rad17	0.00181653	0.0577491	0.304	0.241	1
Bcar1	0.00254358	0.0577491	0.181	0.133	1
Akap10	0.0629078	0.0577298	0.454	0.41	1
Trafd1	0.00217263	0.0577235	0.212	0.159	1
Leo1	0.0052293	0.0577217	0.141	0.102	1
Ube2e3	0.0649175	0.0576982	0.545	0.513	1
Cops9	0.00254565	0.0576663	0.135	0.094	1
6430590A07Rik	0.003256	0.0576663	0.139	0.098	1
Vars	0.00339333	0.0576663	0.13	0.091	1
Morn4	0.015527	0.0576663	0.131	0.099	1
Spink10	0.0344545	0.0576444	0.28	0.24	1
Utp18	0.0117517	0.0576421	0.163	0.126	1
Psmc5	0.00560348	0.0576305	0.185	0.14	1
Sike1	0.0106114	0.0575461	0.223	0.179	1
Slc25a14	0.00524555	0.0575222	0.175	0.132	1
Shd	0.0193577	0.057503	0.199	0.16	1
Evi5	0.0411995	0.0574987	0.331	0.289	1
Ino80d	0.0159339	0.05749	0.436	0.386	1
5330434G04Rik	0.084473	0.0574808	0.677	0.653	1
Synj1	0.0216176	0.0574701	0.509	0.461	1
Ptpn4	0.0490237	0.0574527	0.817	0.803	1
Ugp2	0.0382072	0.0574409	0.192	0.159	1
Dctn1	0.00962896	0.0573951	0.296	0.244	1
Tmem41b	0.00627069	0.0573874	0.2	0.155	1
Polr2b	0.0294812	0.0573656	0.236	0.198	1
Hnrnpdl	0.103065	0.0573417	0.606	0.59	1
Zfp738	0.0125329	0.0573401	0.178	0.14	1
Mcm4	0.00370313	0.0573109	0.103	0.068	1
Timm9	0.0110461	0.0572844	0.163	0.125	1
Cbll1	0.00128246	0.0572666	0.224	0.167	1
Abhd17a	0.00027669	0.0572451	0.128	0.08	1
Zfp397	0.0127419	0.0572163	0.472	0.414	1
Tmem234	0.0235674	0.0572043	0.38	0.335	1
Lyrm2	0.000618044	0.0571853	0.121	0.077	1
Eif1b	0.00202071	0.0571665	0.179	0.131	1
Esyt2	0.029918	0.0571485	0.378	0.33	1
Diaph3	0.98103	0.057104	0.238	0.247	1
1110004F10Rik	0.0171829	0.0570617	0.524	0.471	1
Tmed8	0.00533072	0.0570575	0.123	0.087	1
[truncated: 4,867 more rows]
