# Supplementary material for: Loss of Ezh2 in the medial ganglionic eminence alters interneuron fate, cell morphology and gene expression profiles
Source: Front Cell Neurosci. 2024 Feb 14;18:1334244. doi: 10.3389/fncel.2024.1334244 (PMC10899338; doi:10.3389/fncel.2024.1334244)
Supplement: Supplementary file 4 [file Table_2.xlsx]

## Sheet: Sheet1
gene	p_val	avg_log2FC	pct.1	pct.2	p_val_adj
Epha5	1.36201e-155	0.94032	0.856	0.636	3.15795e-151
Zeb2	7.49136e-148	0.659378	0.943	0.802	1.73695e-143
Lin28b	2.43173e-147	-0.453016	0.044	0.249	5.63821e-143
Nnat	1.02086e-143	-0.515529	1	1	2.36698e-139
Dcc	1.12824e-137	-1.18014	0.476	0.719	2.61593e-133
Rmst	1.09256e-133	-0.962501	0.073	0.283	2.53322e-129
Cacna2d3	1.05112e-122	-0.730191	0.24	0.498	2.43713e-118
Cdk14	8.13684e-121	0.527619	0.96	0.899	1.88661e-116
Sox1ot	4.12379e-113	0.662339	0.839	0.68	9.56142e-109
Rapgef5	4.25748e-95	-0.581457	0.197	0.407	9.8714e-91
Zic1	6.96477e-87	-0.281206	0.042	0.182	1.61485e-82
Grin2b	7.80145e-85	-0.561521	0.2	0.4	1.80884e-80
Sox2ot	1.7448e-79	0.447682	0.981	0.936	4.0455e-75
Lhx8	1.77687e-79	-0.482352	0.202	0.398	4.11984e-75
Vav3	3.44594e-74	-0.420499	0.091	0.245	7.98975e-70
Lypd6	3.93465e-66	-0.325912	0.034	0.145	9.12287e-62
Pde4dip	1.44432e-65	0.450653	0.733	0.596	3.3488e-61
Dleu2	7.04364e-64	0.381913	0.861	0.75	1.63314e-59
Mob3b	7.81709e-64	0.41837	0.335	0.16	1.81247e-59
Sst	1.22124e-63	-0.490741	0.057	0.179	2.83156e-59
Ank3	7.88228e-63	-0.467821	0.714	0.833	1.82759e-58
Bcl11a	1.60632e-62	-0.400393	0.858	0.916	3.72441e-58
Sh3rf1	2.25712e-62	0.43009	0.771	0.624	5.23336e-58
Sfmbt2	4.29175e-62	-0.266636	0.097	0.241	9.95085e-58
C1qtnf4	1.2857e-61	-0.227602	0.076	0.207	2.98102e-57
Cntnap5c	4.56437e-61	0.525067	0.686	0.512	1.0583e-56
Kirrel3	1.68047e-60	-0.521411	0.295	0.481	3.89634e-56
Sez6l	1.35249e-59	-0.22301	0.055	0.173	3.13588e-55
Gm26871	1.36517e-58	-0.533894	0.443	0.627	3.16529e-54
Mest	2.03941e-58	-0.326791	0.231	0.402	4.72858e-54
Brinp2	8.38103e-58	0.453589	0.604	0.438	1.94322e-53
Ccser1	1.18963e-57	-0.53826	0.679	0.813	2.75827e-53
Ina	2.76887e-57	-0.322291	0.313	0.489	6.41991e-53
Amph	3.20211e-55	0.413869	0.575	0.412	7.42442e-51
Robo1	6.15692e-55	-0.51104	0.804	0.897	1.42754e-50
Zfhx3	1.44389e-54	-0.278194	0.104	0.242	3.34781e-50
Zmat4	2.39582e-54	-0.332359	0.043	0.146	5.55494e-50
Ptms	1.34761e-52	-0.310737	0.649	0.769	3.12456e-48
Large1	3.02621e-52	0.310843	0.971	0.94	7.01657e-48
Tox	2.26549e-50	-0.432693	0.825	0.895	5.25277e-46
Pdzrn3	1.57766e-49	0.351503	0.155	0.044	3.65796e-45
Neb	2.07283e-49	0.362374	0.508	0.339	4.80607e-45
Ralyl	4.64639e-49	-0.420082	0.341	0.509	1.07731e-44
Tnik	1.42081e-48	-0.258628	0.068	0.178	3.29428e-44
C530008M17Rik	1.25352e-47	0.300937	0.94	0.899	2.90642e-43
Frmd5	2.928e-47	0.351736	0.961	0.935	6.78887e-43
Elavl2	5.42215e-47	-0.326274	0.849	0.914	1.25718e-42
Igfbpl1	1.01133e-46	-0.294069	0.639	0.77	2.34487e-42
Ripor2	2.96407e-46	-0.335476	0.821	0.907	6.87248e-42
Dnm3	3.8898e-45	-0.368185	0.337	0.485	9.01888e-41
Gad2	5.17708e-44	-0.345882	0.889	0.931	1.20036e-39
Ctnnd2	5.29257e-44	-0.343181	0.855	0.91	1.22714e-39
Prkca	7.4181e-44	0.383043	0.709	0.591	1.71996e-39
Mef2c	1.03793e-43	0.424555	0.368	0.22	2.40653e-39
Gria2	1.12001e-43	-0.373544	0.42	0.577	2.59685e-39
Bmi1	2.44188e-43	-0.2099	0.156	0.287	5.66175e-39
Rgma	2.94594e-43	-0.278542	0.213	0.356	6.83045e-39
Cacna1d	1.06878e-42	-0.205951	0.073	0.176	2.47807e-38
Aff2	3.22408e-42	-0.446989	0.654	0.767	7.47536e-38
Nfasc	1.15427e-41	-0.210341	0.117	0.236	2.6763e-37
Shisa9	3.23228e-41	-0.317479	0.028	0.103	7.49436e-37
Mapk10	5.59751e-41	0.276216	0.92	0.857	1.29784e-36
Nr6a1	1.30872e-40	-0.320313	0.255	0.393	3.03441e-36
H3f3b	2.03242e-40	-0.210375	0.987	0.992	4.71236e-36
AY036118	3.96768e-40	0.16101	1	1	9.19947e-36
Galntl6	1.63049e-39	-0.681027	0.058	0.15	3.78045e-35
Kcnc2	1.90343e-39	-0.561432	0.51	0.639	4.41329e-35
Grid1	1.28385e-38	-0.274411	0.145	0.264	2.97674e-34
Sox6	2.52356e-38	-0.300116	0.978	0.968	5.85111e-34
Sgk1	5.11393e-38	-0.198465	0.099	0.206	1.18572e-33
Fam155a	1.13275e-37	-0.35801	0.732	0.819	2.62639e-33
AC149090.1	1.87281e-37	-0.267971	0.462	0.591	4.3423e-33
Enc1	1.95003e-37	-0.239549	0.232	0.363	4.52133e-33
Clmp	1.11364e-36	-0.265184	0.258	0.392	2.58208e-32
Myo16	2.71748e-36	-0.362005	0.105	0.21	6.30075e-32
Sfta3-ps	6.57857e-36	-0.496277	0.671	0.76	1.52531e-31
5730522E02Rik	2.12733e-35	-0.355916	0.672	0.778	4.93243e-31
Sorcs1	2.59229e-35	0.402583	0.229	0.112	6.01048e-31
Nkx2-1	2.83666e-35	-0.279276	0.431	0.562	6.57708e-31
Basp1	6.22988e-35	-0.235657	0.858	0.91	1.44446e-30
Celf4	3.84934e-34	-0.252188	0.951	0.974	8.92508e-30
Zfp423	4.17279e-34	-0.15282	0.06	0.146	9.67503e-30
Gm42418	4.32286e-34	0.133637	1	1	1.0023e-29
Onecut2	6.41465e-34	-0.160185	0.061	0.146	1.4873e-29
Atxn1	1.21017e-33	-0.294316	0.434	0.569	2.8059e-29
Ncoa1	1.67646e-33	0.301612	0.792	0.726	3.88705e-29
Carmil1	1.7942e-33	-0.295106	0.322	0.455	4.16002e-29
Tshr	2.02692e-33	-0.223388	0.073	0.163	4.69963e-29
Apbb2	2.39874e-33	-0.203088	0.217	0.343	5.56171e-29
Fat3	3.20798e-33	-0.27373	0.075	0.165	7.43803e-29
Meg3	3.96043e-33	-0.340962	0.53	0.647	9.18265e-29
Tmem47	6.33607e-33	0.257696	0.632	0.502	1.46908e-28
Gm38505	1.55891e-32	0.265867	0.764	0.657	3.6145e-28
Tmem178b	1.71711e-32	-0.297569	0.59	0.707	3.9813e-28
Hecw1	1.90289e-32	-0.267795	0.337	0.467	4.41204e-28
Scn3a	1.98558e-32	-0.259489	0.422	0.557	4.60377e-28
Nrcam	2.99858e-32	-0.302195	0.713	0.813	6.9525e-28
Nrxn3	3.69202e-32	0.130256	1	1	8.56033e-28
Hist1h2ap	9.87261e-32	0.198663	0.324	0.201	2.28906e-27
Lhx6	1.36357e-31	-0.237448	0.776	0.862	3.16158e-27
Pam	3.30986e-31	0.211144	0.751	0.593	7.67424e-27
Sgip1	5.77413e-31	-0.25777	0.505	0.634	1.33879e-26
Hmgcll1	1.16348e-30	-0.173468	0.095	0.188	2.69765e-26
Cnih2	1.86752e-30	-0.157003	0.144	0.25	4.33004e-26
Lrfn2	2.1127e-30	-0.162937	0.076	0.161	4.89851e-26
Nexmif	2.52767e-30	-0.227883	0.204	0.321	5.86065e-26
Csrnp3	2.90468e-30	0.246397	0.935	0.901	6.73479e-26
Tox3	3.01931e-30	0.271862	0.495	0.364	7.00058e-26
Skida1	3.07633e-30	-0.175416	0.176	0.288	7.13279e-26
Pde10a	4.05213e-30	-0.202989	0.225	0.349	9.39528e-26
Plppr1	4.09151e-30	-0.198445	0.05	0.123	9.48658e-26
Pbx1	4.72903e-30	0.312319	0.937	0.907	1.09647e-25
Chd5	6.99613e-30	-0.121428	0.057	0.133	1.62212e-25
Blcap	7.81677e-30	-0.196155	0.294	0.417	1.8124e-25
Iqsec3	1.28704e-29	-0.178826	0.095	0.185	2.98413e-25
Pde1a	1.45967e-29	-0.673517	0.043	0.111	3.38439e-25
Nedd4	4.46921e-29	0.190113	0.96	0.944	1.03623e-24
Nrg1	5.69059e-29	-0.618008	0.287	0.405	1.31942e-24
Pou3f2	8.39145e-29	-0.241136	0.351	0.47	1.94564e-24
Pou2f2	8.8668e-29	-0.192048	0.215	0.33	2.05586e-24
Rgs17	1.66514e-28	-0.23445	0.137	0.236	3.86079e-24
Csmd1	1.98639e-28	-0.518438	0.176	0.282	4.60565e-24
Ccdc88a	2.48765e-28	0.157238	0.994	0.99	5.76787e-24
Hist1h1b	6.41008e-28	0.232992	0.65	0.549	1.48624e-23
Klhl29	7.84607e-28	-0.444166	0.256	0.37	1.81919e-23
Mir99ahg	1.15177e-27	-0.234806	0.876	0.941	2.67049e-23
Gm4258	1.72253e-27	0.21142	0.945	0.895	3.99386e-23
Ephb1	1.74957e-27	-0.240925	0.059	0.131	4.05655e-23
Grid2	3.38281e-27	-0.442612	0.072	0.149	7.84339e-23
Tuba1a	3.41576e-27	-0.160252	1	0.999	7.91978e-23
Cacna2d2	4.1084e-27	-0.166521	0.115	0.206	9.52574e-23
Sobp	6.87682e-27	-0.234041	0.647	0.75	1.59446e-22
Atp1a3	7.24799e-27	-0.14724	0.107	0.196	1.68052e-22
Plcl1	8.3518e-27	-0.32725	0.406	0.522	1.93645e-22
Abracl	1.01289e-26	0.227439	0.62	0.525	2.34849e-22
Erc2	1.31328e-26	-0.264555	0.766	0.83	3.04496e-22
Fgf14	3.26604e-26	-0.392907	0.465	0.582	7.57264e-22
Rian	4.13885e-26	-0.221646	0.308	0.423	9.59635e-22
Efnb3	6.04664e-26	-0.153298	0.17	0.271	1.40197e-21
Reln	6.54727e-26	-0.155834	0.041	0.104	1.51805e-21
Cacng3	1.08293e-25	-0.238103	0.168	0.267	2.51089e-21
Sorbs2	1.22283e-25	-0.26508	0.821	0.884	2.83526e-21
Shtn1	2.07705e-25	0.275176	0.398	0.291	4.81586e-21
Tmsb10	2.1152e-25	-0.192848	0.793	0.859	4.9043e-21
Adamtsl1	2.50419e-25	0.23424	0.267	0.165	5.80622e-21
Cadm1	3.17258e-25	-0.351983	0.603	0.695	7.35594e-21
Shank1	3.51418e-25	-0.14008	0.132	0.224	8.14797e-21
Ccnd2	8.02213e-25	0.252434	0.578	0.479	1.86001e-20
Slain1	8.17555e-25	0.239528	0.695	0.603	1.89558e-20
Adra1a	8.21434e-25	-0.204004	0.061	0.131	1.90458e-20
Sgcz	1.48764e-24	-0.421996	0.156	0.249	3.44925e-20
Mapt	3.35755e-24	-0.248083	0.462	0.569	7.78482e-20
Csmd2	4.01977e-24	-0.157165	0.098	0.179	9.32023e-20
Cdc14b	4.10107e-24	-0.120103	0.044	0.105	9.50874e-20
Csmd3	5.66385e-24	-0.319155	0.055	0.12	1.31322e-19
Parp8	9.22505e-24	-0.157301	0.133	0.224	2.13892e-19
Tcf12	1.16122e-23	0.172903	0.984	0.974	2.69241e-19
Bcl9	1.83923e-23	0.230873	0.734	0.651	4.26444e-19
Klhdc10	2.61774e-23	-0.20373	0.561	0.662	6.06949e-19
Lingo2	3.12297e-23	-0.409102	0.054	0.117	7.24091e-19
Cntnap4	3.92733e-23	0.404382	0.395	0.296	9.1059e-19
Nyap2	6.03081e-23	-0.265071	0.321	0.429	1.3983e-18
Olfm2	7.40876e-23	-0.16138	0.145	0.235	1.7178e-18
Chn2	8.21557e-23	-0.228931	0.354	0.46	1.90486e-18
Tanc2	1.00634e-22	-0.224146	0.628	0.718	2.33331e-18
Parm1	1.10086e-22	-0.166898	0.056	0.12	2.55245e-18
Pknox2	1.89053e-22	-0.197969	0.301	0.405	4.38339e-18
Ntn1	2.00134e-22	-0.151298	0.044	0.102	4.6403e-18
Tle4	2.02097e-22	-0.259204	0.232	0.333	4.68582e-18
Nrp1	3.24782e-22	-0.235809	0.126	0.21	7.5304e-18
Tmem130	4.51052e-22	-0.0970054	0.05	0.11	1.04581e-17
Enox1	6.23677e-22	0.208638	0.953	0.922	1.44606e-17
Nalcn	6.63763e-22	-0.190905	0.294	0.404	1.539e-17
Slc1a2	9.73296e-22	-0.111536	0.051	0.11	2.25668e-17
Pcsk1n	1.24069e-21	-0.119975	0.094	0.168	2.87667e-17
Fgf13	2.68216e-21	0.278476	0.812	0.745	6.21886e-17
Cntnap3	3.5212e-21	-0.320039	0.196	0.287	8.16426e-17
Astn1	6.60456e-21	0.167085	0.961	0.948	1.53133e-16
Kcnma1	9.21208e-21	-0.143214	0.073	0.14	2.13591e-16
Maf	9.29542e-21	0.213789	0.633	0.531	2.15524e-16
Tmem108	9.93604e-21	-0.239956	0.817	0.869	2.30377e-16
Hist1h1e	1.04167e-20	0.203764	0.647	0.563	2.41521e-16
Pura	1.36859e-20	-0.146941	0.183	0.273	3.17321e-16
Peg10	1.61076e-20	-0.115539	0.057	0.118	3.73471e-16
Srgap1	2.06057e-20	-0.192315	0.431	0.542	4.77764e-16
Thsd7a	3.91918e-20	-0.306215	0.497	0.597	9.08701e-16
Sfrp1	3.97392e-20	-0.180891	0.241	0.332	9.21394e-16
Mbip	4.40215e-20	-0.193847	0.302	0.402	1.02068e-15
Malat1	4.90568e-20	-0.105071	1	1	1.13743e-15
Nlgn1	6.2526e-20	-0.339338	0.637	0.729	1.44973e-15
Zfp521	7.50987e-20	-0.154693	0.089	0.158	1.74124e-15
Cers6	7.68781e-20	-0.225256	0.437	0.535	1.7825e-15
Commd3	1.49012e-19	-0.148384	0.282	0.379	3.455e-15
Hmgb2	1.75711e-19	0.19037	0.713	0.643	4.07403e-15
Susd4	1.77423e-19	-0.140759	0.177	0.266	4.11373e-15
Islr2	1.92394e-19	-0.115479	0.071	0.135	4.46085e-15
Lsamp	2.30667e-19	-0.353895	0.621	0.7	5.34826e-15
Zeb1	2.81208e-19	-0.192403	0.312	0.411	6.52009e-15
Pnmal2	5.23457e-19	-0.131617	0.161	0.243	1.21369e-14
Cxadr	5.86055e-19	-0.148919	0.384	0.487	1.35883e-14
Epha3	5.8881e-19	0.175576	0.663	0.56	1.36521e-14
Dok6	8.38811e-19	-0.221763	0.143	0.222	1.94487e-14
Dpyd	9.43591e-19	-0.27239	0.134	0.212	2.18781e-14
Clvs1	1.00674e-18	-0.136635	0.095	0.165	2.33422e-14
Abat	1.09789e-18	-0.16787	0.33	0.423	2.54556e-14
Myt1l	1.82269e-18	-0.202045	0.922	0.943	4.22609e-14
Glcci1	1.82562e-18	0.195108	0.705	0.623	4.23288e-14
Map6	2.18903e-18	-0.121285	0.103	0.172	5.07548e-14
Ankrd44	3.05521e-18	-0.158356	0.234	0.325	7.08381e-14
Ror2	3.35548e-18	0.150862	0.243	0.158	7.78001e-14
Cdh11	3.47746e-18	-0.218597	0.147	0.226	8.06283e-14
H2afz	3.65957e-18	0.162484	0.915	0.88	8.48508e-14
Plcb1	4.30284e-18	-0.280194	0.063	0.12	9.97657e-14
Tubb2a	4.57054e-18	-0.169776	0.368	0.462	1.05973e-13
Brinp1	5.24229e-18	0.201876	0.243	0.158	1.21548e-13
Gucy1a1	6.29365e-18	0.157724	0.431	0.326	1.45925e-13
Agap1	6.85063e-18	-0.161352	0.569	0.665	1.58839e-13
Sema6d	7.76274e-18	-0.2824	0.24	0.325	1.79987e-13
Minar2	8.56222e-18	-0.110435	0.101	0.17	1.98524e-13
Neo1	8.86145e-18	-0.157236	0.338	0.436	2.05462e-13
Shisa7	9.75396e-18	-0.0799168	0.055	0.11	2.26155e-13
Ptprn2	1.21088e-17	-0.184322	0.659	0.741	2.80755e-13
Lemd1	1.24058e-17	-0.118734	0.122	0.195	2.87642e-13
Bex2	1.67189e-17	-0.147775	0.418	0.512	3.87644e-13
Pgap1	3.25345e-17	-0.166884	0.347	0.439	7.54345e-13
Fam135b	4.64257e-17	0.202919	0.404	0.308	1.07643e-12
Ppm1e	5.30928e-17	-0.231656	0.635	0.708	1.23101e-12
Epb41l4a	6.38978e-17	0.187857	0.632	0.538	1.48153e-12
Gm47283	7.67735e-17	-0.148023	0.391	0.491	1.78007e-12
Cdh22	8.00401e-17	-0.0860945	0.057	0.11	1.85581e-12
Dlgap1	8.59379e-17	0.19514	0.779	0.723	1.99256e-12
Mpp7	9.01726e-17	-0.139913	0.207	0.291	2.09074e-12
Tspan13	9.35226e-17	-0.129391	0.319	0.412	2.16842e-12
Epha4	9.53427e-17	0.184767	0.939	0.922	2.21062e-12
8030451O07Rik	1.20463e-16	-0.0935385	0.067	0.125	2.79305e-12
Inpp5f	1.34016e-16	-0.15007	0.262	0.346	3.1073e-12
Maged1	1.42376e-16	-0.139144	0.676	0.761	3.30112e-12
Adarb2	1.62187e-16	-0.649809	0.161	0.235	3.76047e-12
Fut8	2.15797e-16	-0.220964	0.268	0.35	5.00346e-12
Kat6b	2.40044e-16	0.19048	0.721	0.667	5.56567e-12
Itgb8	2.40538e-16	0.155343	0.282	0.197	5.57711e-12
Dnajc1	2.5987e-16	-0.155474	0.369	0.464	6.02534e-12
Sncaip	2.84182e-16	-0.157735	0.326	0.417	6.58905e-12
Mllt3	3.13352e-16	-0.222267	0.722	0.781	7.26537e-12
Hist1h2ae	3.87369e-16	0.144757	0.403	0.314	8.98154e-12
Dynll2	3.8953e-16	-0.129728	0.262	0.348	9.03164e-12
Pgbd5	4.16932e-16	-0.098302	0.083	0.143	9.66699e-12
Trib2	4.20154e-16	-0.138451	0.242	0.324	9.7417e-12
Cdr1os	4.44311e-16	-0.126201	0.143	0.216	1.03018e-11
Sp9	4.66457e-16	0.161699	0.647	0.575	1.08153e-11
Gjc1	4.99446e-16	-0.0941054	0.1	0.165	1.15802e-11
Tbc1d30	6.22851e-16	-0.0935114	0.079	0.138	1.44414e-11
Insyn2b	6.42185e-16	-0.105068	0.057	0.108	1.48897e-11
Snap91	6.83124e-16	-0.135969	0.317	0.41	1.58389e-11
Pkp4	6.90757e-16	0.226567	0.489	0.411	1.60159e-11
Meis1	1.18263e-15	-0.214171	0.27	0.347	2.74205e-11
Rell1	1.22678e-15	0.118153	0.203	0.131	2.84442e-11
Cdon	1.25768e-15	-0.100137	0.094	0.156	2.91606e-11
Fam222a	1.2641e-15	-0.144747	0.228	0.306	2.93095e-11
Dtd1	1.51304e-15	-0.135355	0.108	0.171	3.50814e-11
Plcxd3	1.72607e-15	0.224804	0.538	0.447	4.00206e-11
Shb	1.93539e-15	-0.164087	0.343	0.428	4.48741e-11
Epb41	2.08375e-15	-0.139701	0.256	0.34	4.83138e-11
Znrf2	2.34564e-15	-0.101372	0.086	0.145	5.4386e-11
Sntg1	4.17946e-15	-0.206149	0.282	0.367	9.6905e-11
Mir124-2hg	4.73912e-15	-0.125925	0.305	0.396	1.09881e-10
Zfp827	5.77327e-15	-0.132251	0.36	0.451	1.33859e-10
Shisal1	5.95001e-15	-0.0871516	0.064	0.116	1.37957e-10
Elmod1	6.13982e-15	-0.0970703	0.079	0.136	1.42358e-10
Ndst3	6.90506e-15	-0.24709	0.111	0.173	1.60101e-10
Cacna1a	7.26227e-15	-0.156517	0.382	0.468	1.68383e-10
Bex3	8.16859e-15	-0.128704	0.33	0.417	1.89397e-10
B3galt1	8.67175e-15	-0.194385	0.454	0.54	2.01063e-10
Celf5	9.56411e-15	-0.130793	0.267	0.347	2.21753e-10
Nova1	1.01736e-14	-0.146002	0.139	0.207	2.35886e-10
Wls	1.03532e-14	0.127075	0.119	0.065	2.4005e-10
Gm45025	1.23163e-14	-0.182771	0.314	0.391	2.85567e-10
1810026B05Rik	1.73139e-14	-0.148522	0.546	0.631	4.01439e-10
Pacsin1	2.1585e-14	-0.0842209	0.084	0.141	5.0047e-10
Aig1	2.81986e-14	-0.105833	0.124	0.19	6.53814e-10
Pak7	3.29358e-14	-0.15662	0.603	0.688	7.6365e-10
Adgrl3	3.47327e-14	-0.197744	0.641	0.708	8.05312e-10
Cacnb2	3.63001e-14	-0.167782	0.193	0.269	8.41655e-10
Actl6b	5.03519e-14	-0.102886	0.164	0.235	1.16746e-09
Ezr	6.83433e-14	0.110556	0.234	0.162	1.58461e-09
Samd5	7.30842e-14	-0.174626	0.09	0.146	1.69453e-09
Ksr2	7.33413e-14	-0.0998901	0.143	0.211	1.70049e-09
Gap43	9.13606e-14	-0.120757	0.164	0.232	2.11829e-09
Kcnd3	1.00999e-13	-0.179874	0.551	0.639	2.34176e-09
Ackr3	1.01813e-13	0.140382	0.711	0.637	2.36063e-09
Aplp1	1.04624e-13	-0.126501	0.343	0.424	2.4258e-09
Cdh8	1.21952e-13	-0.38655	0.104	0.161	2.82757e-09
Cd200	1.51094e-13	-0.0826713	0.07	0.121	3.50325e-09
Plxna1	1.74517e-13	-0.0876496	0.12	0.182	4.04636e-09
Arhgap20	1.90378e-13	-0.108201	0.094	0.15	4.41411e-09
Dcbld1	2.14391e-13	-0.11369	0.11	0.169	4.97087e-09
Tmeff2	2.20692e-13	-0.246274	0.078	0.13	5.11696e-09
Tmx4	2.41348e-13	-0.118665	0.294	0.376	5.59589e-09
Fstl5	2.66238e-13	-0.302644	0.412	0.484	6.17298e-09
C130071C03Rik	3.30939e-13	0.136307	0.872	0.833	7.67315e-09
Gm17750	3.36693e-13	-0.165038	0.626	0.69	7.80655e-09
Psd3	3.63187e-13	-0.196259	0.405	0.481	8.42086e-09
Copg2	3.7527e-13	-0.136073	0.336	0.418	8.70101e-09
Rnf150	3.84048e-13	-0.129622	0.422	0.514	8.90454e-09
Lrrc7	4.47196e-13	0.21584	0.707	0.633	1.03687e-08
Kcnd2	4.62577e-13	-0.395022	0.14	0.202	1.07253e-08
Rbfox3	4.97178e-13	-0.105756	0.129	0.192	1.15276e-08
Asic2	5.60308e-13	-0.106723	0.063	0.111	1.29913e-08
Foxo1	6.1797e-13	-0.146072	0.099	0.154	1.43283e-08
Tnrc6c	6.37625e-13	-0.130861	0.896	0.929	1.4784e-08
Cntnap2	6.96946e-13	-0.50706	0.104	0.16	1.61594e-08
Srrm3	8.64611e-13	-0.13006	0.321	0.397	2.00469e-08
Atp2b1	9.91596e-13	-0.13316	0.246	0.319	2.29911e-08
Top2a	1.07718e-12	0.179062	0.419	0.345	2.49756e-08
Aff3	1.08282e-12	-0.210801	0.383	0.465	2.51062e-08
Prkcb	1.12423e-12	-0.0944481	0.093	0.148	2.60664e-08
Gm26973	1.23052e-12	-0.129355	0.143	0.205	2.85309e-08
Cipc	1.47977e-12	-0.0926796	0.13	0.191	3.431e-08
Kcnn2	1.6022e-12	0.189189	0.433	0.356	3.71486e-08
Tmc7	1.75909e-12	0.0964033	0.174	0.114	4.07862e-08
Mical3	1.83183e-12	-0.146129	0.363	0.435	4.24727e-08
St8sia2	1.97238e-12	-0.146062	0.72	0.775	4.57317e-08
Phf20l1	2.1231e-12	0.15778	0.856	0.83	4.92261e-08
March1	2.29564e-12	-0.192885	0.058	0.103	5.32268e-08
Map9	2.48336e-12	-0.0869871	0.121	0.179	5.75791e-08
Mmd	3.25433e-12	-0.0705998	0.073	0.121	7.54548e-08
Ube2m	3.26479e-12	-0.0859596	0.144	0.206	7.56975e-08
Dmxl2	3.42137e-12	-0.124306	0.304	0.377	7.93278e-08
Rbms3	3.56856e-12	-0.163169	0.598	0.675	8.27406e-08
Nkain2	3.57248e-12	-0.385077	0.129	0.186	8.28315e-08
Magi2	3.90028e-12	-0.140047	0.957	0.965	9.04319e-08
Car2	4.146e-12	0.0683302	0.101	0.055	9.61291e-08
Sbk1	4.26062e-12	-0.115469	0.442	0.523	9.87868e-08
Prkce	4.40158e-12	-0.10744	0.083	0.132	1.02055e-07
Atp8a1	5.81724e-12	-0.140231	0.327	0.401	1.34878e-07
Pten	5.97438e-12	0.165477	0.648	0.593	1.38522e-07
Zfp704	6.40456e-12	0.14504	0.822	0.784	1.48496e-07
B020031H02Rik	7.20415e-12	0.142563	0.333	0.256	1.67035e-07
Cacna1c	7.39471e-12	-0.15008	0.327	0.405	1.71454e-07
Prnp	7.77741e-12	-0.0891631	0.135	0.194	1.80327e-07
Dner	9.49752e-12	-0.183266	0.539	0.607	2.20209e-07
Kctd1	9.89451e-12	-0.0960408	0.143	0.203	2.29414e-07
Stxbp5	1.08706e-11	-0.0978633	0.203	0.272	2.52046e-07
Thada	1.20271e-11	-0.102283	0.215	0.284	2.7886e-07
Rgs7	1.30907e-11	-0.113646	0.072	0.118	3.03522e-07
Dpysl3	1.38859e-11	0.145128	0.91	0.894	3.21959e-07
Tsix	1.48441e-11	-0.173125	0.191	0.254	3.44175e-07
Spats2l	1.75772e-11	-0.178654	0.579	0.646	4.07545e-07
Sorbs2os	1.87077e-11	-0.112529	0.218	0.284	4.33757e-07
Tubb5	1.88477e-11	0.104934	0.985	0.984	4.37003e-07
Klf7	1.92081e-11	0.130818	0.588	0.514	4.45359e-07
Mapre3	1.9503e-11	-0.0964074	0.175	0.238	4.52198e-07
Ece1	1.95637e-11	-0.0879655	0.127	0.184	4.53605e-07
H2afv	2.22131e-11	0.134459	0.847	0.822	5.15033e-07
Rnf13	2.29587e-11	0.142322	0.503	0.433	5.32321e-07
Slc9a7	2.3724e-11	-0.080943	0.065	0.109	5.50064e-07
Pip4k2a	2.51279e-11	-0.106394	0.13	0.187	5.82616e-07
Spag9	2.90729e-11	0.114616	0.902	0.885	6.74083e-07
Gphn	3.10963e-11	-0.14502	0.624	0.694	7.20998e-07
Adgrb3	3.24664e-11	-0.238836	0.365	0.44	7.52766e-07
Xist	3.29899e-11	-0.287576	0.268	0.336	7.64904e-07
Ndn	3.40518e-11	-0.105382	0.123	0.178	7.89525e-07
Gria4	3.49548e-11	0.159566	0.86	0.811	8.10462e-07
Dlx6os1	3.69482e-11	-0.172547	0.986	0.975	8.56682e-07
Ano10	4.05367e-11	-0.0643229	0.094	0.145	9.39884e-07
Zfp428	4.08703e-11	-0.114317	0.337	0.409	9.47619e-07
Pnmal1	4.26317e-11	-0.0715089	0.074	0.119	9.88459e-07
Runx1t1	4.74927e-11	0.124784	0.963	0.951	1.10117e-06
Fgd3	4.86357e-11	0.103442	0.317	0.243	1.12767e-06
Hexb	5.08611e-11	-0.104264	0.254	0.321	1.17926e-06
Tub	5.18917e-11	-0.0844629	0.101	0.151	1.20316e-06
Astn2	5.23464e-11	-0.122684	0.284	0.354	1.2137e-06
Kifap3	5.37305e-11	-0.11972	0.573	0.647	1.2458e-06
Tenm3	6.92737e-11	-0.11694	0.086	0.134	1.60618e-06
Rplp1	7.1454e-11	-0.111663	0.877	0.908	1.65673e-06
Zbtb16	7.16215e-11	0.0817487	0.181	0.122	1.66062e-06
Snrpn	7.32479e-11	-0.134298	0.581	0.658	1.69833e-06
Fam49b	7.74319e-11	-0.12235	0.322	0.395	1.79534e-06
Cntnap5b	8.00379e-11	-0.256528	0.095	0.144	1.85576e-06
Cox6a1	8.65273e-11	-0.106346	0.497	0.574	2.00622e-06
Masp1	8.82402e-11	-0.0815729	0.072	0.116	2.04594e-06
D030055H07Rik	9.16076e-11	-0.0597009	0.061	0.103	2.12401e-06
Dpp6	9.57099e-11	-0.159812	0.443	0.516	2.21913e-06
Dlgap2	1.09796e-10	-0.231247	0.661	0.727	2.54574e-06
Pclo	1.14904e-10	-0.126339	0.223	0.288	2.66417e-06
Focad	1.35093e-10	-0.0890422	0.086	0.132	3.13226e-06
Utrn	1.54945e-10	0.108242	0.18	0.125	3.59256e-06
Gng3	1.68354e-10	-0.09022	0.172	0.231	3.90345e-06
Cdh10	1.79836e-10	-0.194004	0.069	0.111	4.16969e-06
Tmem229b	1.80852e-10	-0.0897447	0.13	0.183	4.19323e-06
Pcca	1.93912e-10	-0.104597	0.168	0.227	4.49604e-06
Slc4a8	2.01154e-10	-0.0745441	0.099	0.149	4.66396e-06
Cox6c	2.07174e-10	-0.116397	0.437	0.507	4.80354e-06
Adgrb1	2.37575e-10	-0.0684935	0.11	0.161	5.50841e-06
Calr	2.47307e-10	-0.113274	0.451	0.524	5.73407e-06
Nap1l5	2.59912e-10	-0.0827371	0.075	0.118	6.02633e-06
Gm5441	3.04035e-10	-0.096186	0.178	0.238	7.04935e-06
Mmp16	3.21311e-10	-0.164271	0.356	0.429	7.44992e-06
Adgrl1	3.36366e-10	-0.10492	0.327	0.397	7.79899e-06
Lgi1	3.38035e-10	-0.0968869	0.16	0.22	7.83769e-06
Xpr1	3.47851e-10	-0.124186	0.407	0.474	8.06527e-06
Nlk	3.67932e-10	-0.170549	0.807	0.848	8.53087e-06
Dscaml1	3.74991e-10	0.12203	0.934	0.919	8.69454e-06
Ly6h	4.32997e-10	-0.132061	0.276	0.337	1.00395e-05
Trps1	4.53056e-10	-0.140255	0.133	0.186	1.05046e-05
Galnt17	4.64158e-10	-0.120814	0.136	0.19	1.0762e-05
A230057D06Rik	4.81837e-10	0.191921	0.898	0.894	1.11719e-05
Gpc2	5.13101e-10	-0.101743	0.341	0.409	1.18968e-05
Ctnna2	5.34625e-10	-0.123554	0.999	0.999	1.23958e-05
mt-Nd3	5.60725e-10	-0.112077	0.906	0.931	1.3001e-05
Nrg3	6.26283e-10	-0.254376	0.131	0.182	1.4521e-05
Rims2	6.33053e-10	-0.1254	0.848	0.884	1.4678e-05
Zdbf2	6.38092e-10	-0.0755653	0.095	0.142	1.47948e-05
Akt3	6.42978e-10	0.175414	0.756	0.736	1.49081e-05
Gm17167	6.4497e-10	0.0819331	0.173	0.119	1.49543e-05
Hist1h2ab	6.70812e-10	0.0962825	0.25	0.19	1.55534e-05
Olfm1	6.98266e-10	-0.105865	0.233	0.295	1.619e-05
Srgap2	7.06101e-10	0.148891	0.732	0.676	1.63717e-05
Lrrtm4	7.56174e-10	-0.223001	0.086	0.132	1.75326e-05
Nfix	7.62977e-10	-0.107257	0.142	0.194	1.76904e-05
Sbf2	7.69228e-10	-0.12689	0.714	0.77	1.78353e-05
Dock3	7.69413e-10	-0.11802	0.394	0.464	1.78396e-05
Neto1	7.89863e-10	-0.203915	0.375	0.443	1.83138e-05
Tiam2	7.98887e-10	-0.133927	0.257	0.32	1.8523e-05
Rtn3	9.31729e-10	0.112547	0.928	0.919	2.16031e-05
Esrrg	1.03142e-09	-0.106101	0.082	0.126	2.39145e-05
Syne2	1.06314e-09	0.122864	0.78	0.739	2.46499e-05
Actb	1.11526e-09	0.0795317	0.994	0.994	2.58584e-05
Smad1	1.14101e-09	-0.0896078	0.188	0.247	2.64555e-05
Rundc3b	1.25158e-09	-0.122841	0.316	0.38	2.90192e-05
Bend5	1.47399e-09	-0.0698601	0.094	0.139	3.41759e-05
Sox5	1.51352e-09	-0.135743	0.751	0.819	3.50926e-05
Acvr2a	1.5384e-09	-0.111286	0.317	0.383	3.56694e-05
Klhl13	1.53877e-09	-0.124856	0.297	0.362	3.56778e-05
Snx24	1.59177e-09	-0.0713123	0.067	0.107	3.69069e-05
Irf2bpl	1.59604e-09	-0.0947371	0.267	0.331	3.70057e-05
Cpe	1.84956e-09	-0.10647	0.627	0.699	4.28838e-05
Tcf4	2.35184e-09	0.0831099	0.997	0.994	5.45297e-05
St18	2.46088e-09	-0.184979	0.317	0.381	5.70579e-05
Pou2f1	2.90731e-09	0.132198	0.721	0.68	6.74089e-05
Arhgap18	2.93654e-09	-0.144827	0.2	0.256	6.80865e-05
Rnf219	2.97434e-09	0.0922923	0.225	0.169	6.8963e-05
Rab3c	3.26853e-09	-0.135524	0.54	0.605	7.57842e-05
Tmem151b	3.42557e-09	-0.0631086	0.097	0.142	7.94252e-05
Map4k4	3.45772e-09	0.0993101	0.929	0.915	8.01707e-05
Mbp	3.60924e-09	-0.0596441	0.078	0.119	8.36837e-05
Slit1	3.70468e-09	0.0990743	0.169	0.119	8.58967e-05
Kcnq2	3.73258e-09	-0.109924	0.321	0.382	8.65436e-05
Gm12064	3.90379e-09	-0.0789783	0.121	0.169	9.05133e-05
Hist1h4d	4.06906e-09	0.120545	0.563	0.502	9.43453e-05
Celf2	4.13524e-09	0.0921668	0.998	0.996	9.58797e-05
Dpf1	4.2906e-09	-0.0895423	0.239	0.3	9.94818e-05
Chd3	4.4923e-09	-0.110145	0.723	0.779	0.000104158
Tiparp	4.89673e-09	0.1253	0.534	0.471	0.000113535
Acsl6	4.93172e-09	-0.0726414	0.123	0.172	0.000114347
Atrnl1	5.54809e-09	-0.123694	0.454	0.525	0.000128638
Pde1c	5.69535e-09	0.110791	0.304	0.24	0.000132052
Kidins220	6.87586e-09	-0.0986941	0.642	0.703	0.000159424
Rnaseh2b	6.88759e-09	0.0862788	0.238	0.182	0.000159696
Ptprj	6.94822e-09	-0.0758201	0.07	0.108	0.000161101
Grip1	7.09053e-09	0.252675	0.882	0.89	0.000164401
Srrm4	7.22164e-09	0.147975	0.678	0.639	0.000167441
Btg1	7.22914e-09	-0.10327	0.392	0.456	0.000167615
Nav3	7.52699e-09	0.143612	0.968	0.967	0.000174521
A330076H08Rik	7.86521e-09	0.152104	0.77	0.755	0.000182363
Hmgcr	7.92355e-09	-0.0897492	0.3	0.366	0.000183715
Hmgn1	8.20179e-09	-0.10871	0.638	0.693	0.000190167
Ptprm	8.45249e-09	-0.115696	0.118	0.165	0.000195979
Galnt10	8.48625e-09	-0.105139	0.138	0.188	0.000196762
Ptprd	8.96733e-09	-0.234118	0.87	0.889	0.000207917
Fam168b	9.07095e-09	-0.0973828	0.447	0.51	0.000210319
Sox1	9.20955e-09	0.115964	0.503	0.441	0.000213533
Zc3h6	9.61955e-09	-0.0871949	0.171	0.225	0.000223039
Bex1	9.62893e-09	-0.0687757	0.12	0.167	0.000223256
Nrf1	1.04237e-08	0.123762	0.542	0.483	0.000241684
Arl5a	1.06413e-08	0.118112	0.419	0.358	0.00024673
Tusc3	1.08054e-08	-0.0823835	0.362	0.434	0.000250535
Foxk2	1.1132e-08	-0.0777607	0.174	0.228	0.000258107
Rragd	1.38427e-08	-0.0570281	0.067	0.105	0.000320958
Ano4	1.39315e-08	-0.110549	0.245	0.302	0.000323015
Etv1	1.39405e-08	0.196225	0.423	0.362	0.000323223
Tpt1	1.44442e-08	0.0794713	0.995	0.994	0.000334902
Dcx	1.47256e-08	0.0992631	0.956	0.947	0.000341428
Ap3b1	1.48991e-08	0.139035	0.432	0.378	0.000345451
Tmod2	1.62225e-08	-0.0895764	0.203	0.258	0.000376135
Paqr3	1.62687e-08	-0.0708108	0.116	0.161	0.000377207
Gm3764	1.75532e-08	0.110737	0.892	0.873	0.000406989
Sclt1	1.76053e-08	-0.115722	0.325	0.388	0.000408197
Adam22	2.01552e-08	-0.119279	0.44	0.503	0.000467318
Kcnk2	2.07783e-08	-0.132343	0.351	0.408	0.000481766
Rab11fip4	2.11087e-08	-0.0724975	0.15	0.2	0.000489426
Rbfox1	2.11806e-08	-0.336435	0.278	0.333	0.000491094
Hmgcs1	2.25661e-08	-0.0907513	0.267	0.327	0.000523218
Kcnip1	2.34159e-08	-0.139042	0.134	0.181	0.000542921
G3bp2	2.36481e-08	-0.0896746	0.461	0.534	0.000548306
Fkbp4	2.50542e-08	-0.0770513	0.23	0.288	0.000580907
Ntrk3	2.60205e-08	-0.101273	0.103	0.146	0.000603311
Ezh2	2.6833e-08	0.108899	0.766	0.737	0.00062215
Rps6ka5	2.68345e-08	0.137827	0.685	0.639	0.000622185
Sv2a	2.78202e-08	-0.0610651	0.078	0.116	0.00064504
Zdhhc21	3.01597e-08	-0.0689363	0.195	0.251	0.000699282
Dusp8	3.12644e-08	-0.0609327	0.091	0.132	0.000724897
Smc4	3.21254e-08	0.122952	0.368	0.312	0.00074486
Cdk5r1	3.31798e-08	-0.106133	0.517	0.57	0.000769307
Kcnq1ot1	3.45364e-08	-0.109473	0.464	0.531	0.000800762
Otud7a	3.59503e-08	-0.105334	0.13	0.176	0.000833545
Scd2	3.62734e-08	-0.109114	0.611	0.662	0.000841035
Myt1	3.76038e-08	-0.101538	0.431	0.49	0.000871882
Gm1673	3.96435e-08	-0.0819297	0.466	0.539	0.000919175
Mapk8	4.39901e-08	-0.0924038	0.488	0.559	0.00101995
Cdkn1c	4.57204e-08	-0.073291	0.146	0.194	0.00106007
Casc4	4.62914e-08	-0.0856873	0.425	0.496	0.00107331
Spock3	4.67004e-08	-0.11131	0.162	0.212	0.0010828
Rad23b	4.67077e-08	-0.0884004	0.265	0.324	0.00108296
Tmem131l	4.7555e-08	0.0952993	0.945	0.937	0.00110261
Hist3h2a	5.03931e-08	-0.0887693	0.289	0.346	0.00116841
Robo2	5.24496e-08	-0.189019	0.842	0.87	0.0012161
Erbb4	5.48307e-08	0.088728	0.992	0.984	0.0012713
Efr3a	5.53251e-08	-0.0787812	0.137	0.184	0.00128277
Cd24a	5.54849e-08	-0.100476	0.587	0.637	0.00128647
Ttll7	5.58982e-08	-0.0816195	0.211	0.267	0.00129605
Eml6	5.63038e-08	-0.0855321	0.195	0.25	0.00130546
Gabrb3	5.99828e-08	-0.130204	0.584	0.64	0.00139076
Atp9a	6.04193e-08	-0.0862192	0.299	0.359	0.00140088
Adcy2	6.22478e-08	-0.117227	0.117	0.159	0.00144328
Gabrg3	6.31739e-08	-0.214208	0.242	0.295	0.00146475
Uqcc2	7.27781e-08	-0.073036	0.15	0.197	0.00168743
Ptpn5	7.31401e-08	-0.0634563	0.097	0.138	0.00169583
Gnas	7.56429e-08	-0.0963999	0.812	0.86	0.00175386
Trim2	7.75266e-08	0.0885322	0.925	0.911	0.00179753
Atxn7l3b	7.79884e-08	-0.0966642	0.693	0.749	0.00180824
2610307P16Rik	8.02933e-08	0.128914	0.832	0.799	0.00186168
Ranbp17	8.03242e-08	-0.099184	0.149	0.195	0.0018624
Pdcd5	8.15712e-08	-0.0807357	0.289	0.349	0.00189131
Galnt14	8.48904e-08	-0.108562	0.126	0.171	0.00196827
Gm27032	8.55001e-08	-0.0622574	0.133	0.179	0.00198241
Hdac4	9.01553e-08	-0.101578	0.405	0.467	0.00209034
Tet1	9.62168e-08	-0.0789482	0.228	0.283	0.00223088
Rbp1	9.805e-08	-0.100623	0.488	0.551	0.00227339
Top2b	9.9916e-08	0.0882097	0.913	0.906	0.00231665
Pde5a	1.02133e-07	0.098958	0.211	0.162	0.00236807
Itm2c	1.06033e-07	-0.0475435	0.075	0.111	0.00245847
Cdc42bpa	1.06343e-07	-0.100624	0.53	0.589	0.00246568
Bzw2	1.13374e-07	-0.100358	0.541	0.601	0.0026287
Nav1	1.18935e-07	-0.118542	0.74	0.783	0.00275763
Auts2	1.19972e-07	-0.085557	1	1	0.00278168
Rims1	1.22607e-07	-0.112778	0.38	0.447	0.00284276
Tmsb4x	1.27151e-07	0.0673286	0.998	0.998	0.00294813
Nfib	1.27579e-07	-0.249415	0.794	0.782	0.00295805
R3hdm2	1.27782e-07	-0.0941181	0.548	0.612	0.00296274
Gtdc1	1.29467e-07	0.11888	0.69	0.641	0.00300183
Nsg1	1.32993e-07	-0.100002	0.589	0.643	0.00308358
Gm16351	1.39312e-07	-0.10044	0.254	0.306	0.0032301
Eid1	1.45347e-07	-0.091057	0.43	0.489	0.00337
Maml3	1.54867e-07	-0.152238	0.698	0.743	0.00359075
Hivep2	1.55116e-07	-0.0970022	0.137	0.181	0.00359651
Rasal2	1.55206e-07	0.136041	0.667	0.627	0.00359861
Kif11	1.60895e-07	0.115394	0.167	0.123	0.00373051
Jazf1	1.82434e-07	-0.126182	0.769	0.809	0.00422991
Macrod2	1.83703e-07	-0.168871	0.484	0.541	0.00425934
Slc25a4	1.87772e-07	-0.0897321	0.543	0.601	0.00435369
Gprasp2	1.92445e-07	-0.0759679	0.144	0.188	0.00446204
Pcdh11x	1.98358e-07	-0.155917	0.103	0.144	0.00459912
Ccdc30	2.06339e-07	-0.0834709	0.175	0.224	0.00478417
Dlg2	2.07455e-07	-0.218297	0.283	0.335	0.00481005
Dlg5	2.13518e-07	-0.0715822	0.162	0.209	0.00495063
Eif4g2	2.13818e-07	-0.103621	0.825	0.858	0.00495759
Pfn2	2.14692e-07	0.112984	0.707	0.68	0.00497786
Fam57b	2.17265e-07	-0.0705423	0.159	0.206	0.00503752
Selenow	2.18651e-07	-0.0766242	0.569	0.636	0.00506965
Gpm6b	2.18708e-07	0.104562	0.737	0.696	0.00507095
Pdzd4	2.23248e-07	-0.0861841	0.316	0.372	0.00517622
Fut9	2.58673e-07	-0.0726682	0.073	0.108	0.0059976
Dennd1b	2.62143e-07	-0.0953255	0.288	0.342	0.00607806
Mdga2	2.65477e-07	-0.183885	0.106	0.146	0.00615535
Hecw2	2.72499e-07	-0.0818287	0.114	0.155	0.00631817
Scube1	2.80258e-07	-0.0590409	0.08	0.117	0.00649805
Ank	2.89841e-07	-0.0779515	0.199	0.249	0.00672025
Rev3l	2.90415e-07	-0.105931	0.684	0.739	0.00673357
Zfp618	3.04559e-07	-0.0825371	0.438	0.502	0.0070615
Dock4	3.13106e-07	-0.15334	0.63	0.675	0.00725968
Slc22a23	3.2071e-07	-0.0731616	0.11	0.15	0.00743598
Gpr45	3.22071e-07	-0.0946996	0.289	0.344	0.00746753
Zdhhc2	3.26126e-07	-0.113829	0.267	0.319	0.00756157
Cox7c	3.31441e-07	-0.0905098	0.553	0.606	0.00768479
Ica1	3.34067e-07	-0.0514705	0.067	0.101	0.00774567
Rab3a	3.40414e-07	-0.0668138	0.169	0.217	0.00789284
Chchd6	3.44204e-07	-0.0760769	0.248	0.302	0.00798072
Sema5b	3.64813e-07	0.107848	0.478	0.421	0.00845856
Vim	3.71363e-07	0.103036	0.41	0.358	0.00861042
Cdca7	3.80395e-07	0.100238	0.517	0.462	0.00881984
Rnft2	3.82443e-07	-0.0496492	0.085	0.121	0.00886733
Plcl2	3.9229e-07	-0.0884812	0.345	0.407	0.00909563
Dnajc10	4.03353e-07	-0.0585734	0.141	0.186	0.00935215
Mir9-3hg	4.08464e-07	-0.13019	0.814	0.845	0.00947066
Arid1b	4.09646e-07	-0.0998944	0.774	0.82	0.00949806
Kcnq3	4.16244e-07	0.106739	0.37	0.313	0.00965104
Tmem178	4.16405e-07	-0.0743309	0.113	0.153	0.00965476
Atp5l	4.41818e-07	-0.0842694	0.383	0.441	0.010244
Hist1h1d	4.59841e-07	0.0803075	0.189	0.146	0.0106619
mt-Atp6	4.93152e-07	0.0825863	1	1	0.0114342
Ptprt	5.31106e-07	-0.164042	0.1	0.139	0.0123142
Pou3f3	5.3387e-07	-0.091714	0.549	0.606	0.0123783
Mdh2	5.34035e-07	-0.0770639	0.364	0.424	0.0123821
Pcdh15	5.47111e-07	-0.220357	0.127	0.169	0.0126853
Phc2	5.54703e-07	-0.0860873	0.6	0.653	0.0128613
Kif2a	5.87194e-07	0.122328	0.594	0.548	0.0136147
Atp5g3	5.95104e-07	-0.0756778	0.335	0.394	0.0137981
Sgsm1	5.98005e-07	-0.0642514	0.118	0.158	0.0138654
Zfp462	6.03584e-07	-0.0979377	0.728	0.776	0.0139947
Plcb4	6.40881e-07	-0.0811256	0.182	0.229	0.0148595
Nmnat2	6.72516e-07	-0.106256	0.616	0.66	0.015593
Xylt1	6.806e-07	-0.106806	0.16	0.203	0.0157804
Psma3	6.84314e-07	-0.0855088	0.479	0.537	0.0158665
Trim39	6.97349e-07	-0.0465593	0.07	0.103	0.0161687
Mprip	7.04187e-07	-0.0749512	0.488	0.55	0.0163273
Cbx4	7.04695e-07	-0.0492132	0.072	0.105	0.0163391
Spop	7.11414e-07	-0.0774221	0.353	0.413	0.0164948
2900097C17Rik	7.31719e-07	-0.0814292	0.26	0.31	0.0169656
Prkag2	7.49742e-07	-0.0546515	0.094	0.131	0.0173835
Mcu	7.62822e-07	-0.0679681	0.1	0.138	0.0176868
Rpl41	7.63867e-07	-0.0915086	0.762	0.802	0.017711
Prkd1	7.86879e-07	-0.137949	0.201	0.248	0.0182446
Fam110b	7.88401e-07	-0.087745	0.39	0.453	0.0182799
Mpp6	7.90471e-07	-0.0955705	0.317	0.369	0.0183279
Mki67	8.22688e-07	0.0904044	0.218	0.172	0.0190748
Scmh1	8.28348e-07	-0.0836594	0.538	0.596	0.0192061
Eml5	8.76932e-07	-0.0863422	0.25	0.301	0.0203325
mt-Co2	8.85887e-07	0.0821755	1	1	0.0205402
Luzp2	8.96629e-07	-0.165416	0.094	0.13	0.0207892
Eml4	9.14443e-07	-0.0923408	0.43	0.487	0.0212023
Sec61g	9.30321e-07	-0.0845415	0.346	0.402	0.0215704
Cenpf	9.42663e-07	0.0960486	0.262	0.214	0.0218566
Calb1	1.04574e-06	-0.0851599	0.075	0.108	0.0242464
Nrip1	1.09488e-06	-0.0720106	0.13	0.171	0.0253859
Rtn1	1.15356e-06	-0.0834387	0.977	0.983	0.0267464
Gm44593	1.17251e-06	-0.19307	0.294	0.343	0.0271859
Rpgr	1.20009e-06	-0.0783928	0.366	0.421	0.0278252
Vat1l	1.25932e-06	0.0893894	0.2	0.155	0.0291985
Slco3a1	1.34399e-06	-0.0597637	0.069	0.101	0.0311618
Sez6l2	1.34424e-06	-0.0590233	0.116	0.154	0.0311675
Rpl37	1.39594e-06	-0.0884896	0.696	0.745	0.0323662
Tgfbr1	1.42491e-06	-0.0810503	0.348	0.404	0.0330381
Kcnt2	1.44425e-06	-0.0809405	0.09	0.125	0.0334864
Uqcrc2	1.45012e-06	-0.0726802	0.317	0.373	0.0336226
Hcn1	1.46594e-06	-0.120832	0.124	0.163	0.0339893
Jarid2	1.47966e-06	0.104278	0.702	0.676	0.0343075
Sept3	1.50265e-06	-0.0816452	0.512	0.57	0.0348405
Ralgapb	1.52417e-06	-0.0732728	0.337	0.395	0.0353394
Slc8a1	1.59566e-06	0.148835	0.468	0.421	0.0369971
Cacng8	1.59726e-06	-0.0593854	0.089	0.124	0.0370342
Hnrnpa0	1.61195e-06	-0.0946506	0.498	0.547	0.0373746
Trappc4	1.61329e-06	-0.0720034	0.349	0.403	0.0374058
Sdk1	1.69991e-06	-0.118023	0.111	0.148	0.0394142
Smad2	1.73657e-06	-0.0728164	0.376	0.431	0.0402642
Nos1ap	1.74989e-06	-0.0667656	0.241	0.294	0.0405729
Mettl8	1.81847e-06	0.0676589	0.21	0.164	0.0421631
Socs2	1.8378e-06	-0.0661213	0.158	0.201	0.0426112
Lrrfip1	1.83994e-06	-0.052203	0.081	0.115	0.0426608
Atp5e	1.86467e-06	-0.0815934	0.305	0.356	0.0432343
Gm26917	1.90053e-06	-0.0719794	0.353	0.408	0.0440656
Atp6v0b	1.92128e-06	-0.0704427	0.486	0.546	0.0445467
Calm2	1.99289e-06	-0.073872	0.768	0.822	0.0462073
Ccdc107	2.00509e-06	-0.0462865	0.089	0.124	0.04649
Gm44686	2.04226e-06	-0.0737158	0.225	0.272	0.0473517
Lonrf2	2.04809e-06	-0.0511267	0.095	0.131	0.0474871
Nr2f2	2.05137e-06	-0.0665657	0.099	0.135	0.0475631
Cdh24	2.07144e-06	-0.0476808	0.086	0.12	0.0480284
Fbxw4	2.07627e-06	-0.0595204	0.127	0.167	0.0481403
Pde3b	2.08281e-06	-0.0869697	0.245	0.296	0.048292
Hspe1	2.18645e-06	-0.080462	0.358	0.411	0.050695
Abca1	2.21073e-06	0.0800095	0.258	0.21	0.0512581
Nrsn1	2.236e-06	-0.0695543	0.101	0.136	0.0518439
Lmtk3	2.39745e-06	-0.0611191	0.163	0.207	0.0555872
Syt16	2.41491e-06	-0.0966091	0.302	0.351	0.0559921
Mb21d2	2.42392e-06	-0.0619731	0.085	0.118	0.0562009
Ddah1	2.51728e-06	-0.0871561	0.201	0.246	0.0583657
Tex2	2.53007e-06	-0.0465766	0.071	0.102	0.0586622
Sec62	2.55987e-06	-0.0675078	0.475	0.535	0.059353
Palld	2.76083e-06	0.0627395	0.13	0.095	0.0640127
Cisd1	2.77326e-06	-0.0605734	0.224	0.274	0.0643009
Fam171b	2.89949e-06	-0.0497131	0.079	0.111	0.0672276
Igdcc3	2.90715e-06	-0.0782371	0.213	0.259	0.0674051
Fam214a	2.9185e-06	-0.0789039	0.337	0.391	0.0676683
Pcsk2	2.99429e-06	-0.0847838	0.143	0.183	0.0694256
Cenpv	3.01599e-06	-0.0875788	0.44	0.492	0.0699287
Ppip5k2	3.02971e-06	-0.0829491	0.414	0.466	0.0702469
Pitpnc1	3.05169e-06	0.105039	0.667	0.631	0.0707566
Atp8a2	3.2465e-06	-0.0731206	0.264	0.314	0.0752734
Nup210	3.28762e-06	-0.0391083	0.072	0.104	0.0762268
Tjp1	3.43529e-06	-0.0809383	0.147	0.187	0.0796506
Ptprg	3.63477e-06	-0.16986	0.189	0.23	0.0842757
Tln2	3.71114e-06	-0.0604072	0.085	0.117	0.0860464
Ndufs6	3.75554e-06	-0.0667618	0.196	0.24	0.087076
N4bp2	3.87447e-06	-0.0723163	0.32	0.374	0.0898334
1700109K24Rik	3.89987e-06	-0.0777036	0.278	0.326	0.0904223
Sox11	3.96607e-06	-0.0972349	0.999	1	0.0919574
Sorcs2	4.01963e-06	-0.0606777	0.098	0.132	0.0931991
Nlgn2	4.20746e-06	-0.0720163	0.267	0.315	0.0975541
Adgrl2	4.27458e-06	-0.105176	0.209	0.256	0.0991103
Tpk1	4.30966e-06	-0.0579417	0.077	0.108	0.0999238
Castor2	4.35118e-06	-0.0658068	0.182	0.226	0.100886
Slc4a3	4.5392e-06	-0.0489973	0.093	0.127	0.105246
Dtx1	4.55113e-06	-0.0559486	0.095	0.128	0.105523
Msantd4	4.66964e-06	-0.0707647	0.182	0.224	0.10827
Ctsl	4.75017e-06	-0.0635942	0.143	0.183	0.110137
Lpgat1	4.79074e-06	-0.0756226	0.319	0.37	0.111078
Jak1	4.90577e-06	-0.0661453	0.135	0.173	0.113745
Dach2	4.90893e-06	-0.134807	0.319	0.369	0.113818
Prc1	5.03843e-06	0.0645879	0.195	0.153	0.116821
Sgsm2	5.31539e-06	-0.0566951	0.111	0.146	0.123243
Atxn2	5.35824e-06	-0.0740259	0.469	0.526	0.124236
Ids	5.46775e-06	-0.0463635	0.083	0.115	0.126775
Kif21b	5.55385e-06	-0.0704475	0.356	0.409	0.128772
Cttnbp2	5.55987e-06	-0.0865266	0.431	0.488	0.128911
Aak1	5.57875e-06	-0.0663721	0.486	0.544	0.129349
Atox1	5.58902e-06	-0.064186	0.165	0.206	0.129587
Arl6ip5	5.74412e-06	-0.0620833	0.165	0.206	0.133183
Snx3	5.74899e-06	-0.0664657	0.289	0.341	0.133296
Sgce	6.01454e-06	-0.101915	0.443	0.493	0.139453
Snap47	6.13595e-06	-0.055877	0.199	0.245	0.142268
Ube2e3	6.28418e-06	-0.0698555	0.482	0.54	0.145705
Cited2	6.39574e-06	0.08352	0.323	0.276	0.148292
Nol4	6.43929e-06	-0.0939811	0.862	0.891	0.149301
mt-Co1	6.68489e-06	0.069094	0.994	0.994	0.154996
Ftl1-ps1	6.75527e-06	-0.0549678	0.142	0.181	0.156628
Slco5a1	6.84053e-06	-0.0735959	0.257	0.305	0.158604
Edil3	7.12425e-06	-0.142927	0.165	0.203	0.165183
Unc50	7.38884e-06	-0.0507743	0.137	0.176	0.171318
Dst	7.42386e-06	-0.0866873	0.422	0.475	0.17213
Stxbp1	7.49424e-06	-0.0677445	0.175	0.216	0.173761
Slc25a11	7.58468e-06	-0.0530657	0.124	0.161	0.175858
Cox5b	7.74796e-06	-0.0709424	0.343	0.392	0.179644
Scrn1	7.75516e-06	-0.0574698	0.125	0.162	0.179811
Rora	8.17445e-06	-0.190389	0.427	0.47	0.189533
Map2	8.28927e-06	0.0670795	0.998	0.998	0.192195
Pabpc4	8.39947e-06	-0.0503619	0.167	0.209	0.19475
Phpt1	8.43327e-06	-0.0477431	0.084	0.115	0.195534
Gtf2a1	8.51177e-06	-0.078043	0.296	0.344	0.197354
Tubb2b	8.6902e-06	-0.0786004	0.965	0.97	0.201491
Cyth3	8.8203e-06	-0.0686939	0.116	0.151	0.204508
BC031181	8.85723e-06	-0.0810963	0.402	0.452	0.205364
Cdkl3	9.00221e-06	-0.0703328	0.183	0.226	0.208725
Ric1	9.01603e-06	-0.0563601	0.179	0.222	0.209046
Atp5mpl	9.06109e-06	-0.0550681	0.223	0.271	0.210091
Chst11	9.19931e-06	-0.0708722	0.222	0.267	0.213295
Mllt10	9.44101e-06	-0.0949325	0.663	0.717	0.218899
B830012L14Rik	9.63638e-06	-0.0692791	0.114	0.148	0.223429
Hras	9.67303e-06	-0.0400755	0.11	0.145	0.224279
Tsc22d2	9.78154e-06	0.116772	0.431	0.391	0.226795
Rmdn1	9.96784e-06	-0.0766096	0.321	0.372	0.231114
Tfdp2	9.96934e-06	0.104041	0.337	0.294	0.231149
Tmem260	1.00407e-05	-0.0627962	0.158	0.198	0.232804
Kbtbd2	1.00767e-05	0.0618623	0.166	0.129	0.233639
Ccdc177	1.01929e-05	-0.047441	0.111	0.146	0.236333
Stim2	1.02415e-05	-0.0561567	0.138	0.176	0.23746
Pag1	1.02428e-05	0.0572585	0.126	0.093	0.23749
Rnf227	1.0294e-05	-0.05836	0.138	0.176	0.238677
Dph6	1.04333e-05	-0.0567448	0.113	0.149	0.241907
Tbc1d16	1.04692e-05	-0.0643015	0.234	0.279	0.242739
Atp6v0c	1.05597e-05	-0.0724273	0.615	0.663	0.244838
Tenm1	1.08074e-05	-0.151882	0.077	0.107	0.25058
Insig2	1.08178e-05	-0.0483533	0.133	0.171	0.250821
Sema6a	1.0932e-05	-0.0491038	0.147	0.186	0.253469
Cops9	1.09414e-05	-0.0550184	0.178	0.22	0.253687
Rab33a	1.09797e-05	-0.0478001	0.104	0.138	0.254574
Wdr7	1.10506e-05	-0.0781039	0.423	0.475	0.256219
Hmgb1	1.11016e-05	0.0792794	0.903	0.879	0.257402
Iqsec1	1.11645e-05	-0.0950753	0.216	0.259	0.258859
Magee1	1.12405e-05	-0.0475835	0.105	0.138	0.260623
Notch1	1.12946e-05	0.064849	0.148	0.112	0.261876
Wwp1	1.1471e-05	-0.0658514	0.182	0.223	0.265967
Dnmt3a	1.14882e-05	-0.0698883	0.284	0.332	0.266366
Ralgapa1	1.15429e-05	-0.0801423	0.483	0.536	0.267633
St6galnac3	1.15473e-05	-0.113065	0.554	0.595	0.267736
Stmn3	1.15861e-05	-0.0818757	0.706	0.743	0.268635
Nbea	1.2127e-05	0.0920165	0.996	0.996	0.281177
Sik3	1.24293e-05	-0.086851	0.35	0.4	0.288185
Pclaf	1.24911e-05	0.0912483	0.256	0.214	0.289618
Bpgm	1.27846e-05	-0.0541795	0.138	0.175	0.296423
Sox4	1.28714e-05	0.0781609	0.954	0.942	0.298436
Elovl6	1.29073e-05	-0.0753873	0.203	0.245	0.299269
Kif5c	1.30891e-05	-0.0843053	0.592	0.641	0.303483
Slc36a4	1.32416e-05	-0.0540944	0.101	0.133	0.307021
Stub1	1.35278e-05	-0.0589728	0.226	0.272	0.313655
Rps4x	1.37394e-05	0.0699029	0.921	0.909	0.318561
Draxin	1.37661e-05	-0.0527711	0.109	0.143	0.319182
Hook1	1.40685e-05	-0.0631792	0.118	0.152	0.326193
Rprm	1.40993e-05	-0.0446482	0.076	0.106	0.326905
Bicd1	1.41038e-05	-0.083311	0.448	0.499	0.327011
Mtmr7	1.43723e-05	-0.0580903	0.138	0.175	0.333236
Mpdz	1.44578e-05	-0.0708338	0.206	0.249	0.335219
Bsg	1.49181e-05	-0.064943	0.37	0.421	0.345891
Rpl31	1.4978e-05	-0.0604072	0.65	0.707	0.347279
Cyp51	1.52103e-05	-0.0687039	0.222	0.266	0.352665
Golm1	1.55542e-05	0.0799217	0.35	0.305	0.36064
Tspan31	1.56505e-05	-0.0514108	0.114	0.148	0.362873
R3hdm1	1.56806e-05	-0.0686859	0.603	0.655	0.363571
Borcs5	1.57946e-05	-0.0437123	0.093	0.125	0.366214
Pxk	1.58263e-05	-0.0592918	0.197	0.239	0.366949
Khdrbs3	1.59445e-05	-0.0477235	0.098	0.131	0.36969
Homer1	1.61842e-05	-0.0709449	0.227	0.271	0.375247
Dhx36	1.68196e-05	-0.074851	0.51	0.56	0.38998
Trio	1.72281e-05	-0.0859611	0.733	0.766	0.399451
Larp4	1.81094e-05	-0.0654182	0.221	0.264	0.419884
Rimkla	1.83905e-05	0.0536606	0.157	0.121	0.426402
AU040320	1.87628e-05	-0.0605437	0.281	0.329	0.435033
Dicer1	1.91167e-05	-0.0675255	0.321	0.37	0.443241
Psap	1.94145e-05	-0.07802	0.351	0.396	0.450146
Galnt7	1.98073e-05	-0.0751177	0.117	0.15	0.459251
Mkrn1	2.00345e-05	-0.0704226	0.362	0.409	0.46452
Wdr43	2.02509e-05	-0.0634582	0.197	0.238	0.469538
Cd2ap	2.04892e-05	-0.0572454	0.243	0.289	0.475063
Braf	2.11401e-05	-0.0837254	0.549	0.592	0.490155
Atp5g1	2.15838e-05	-0.0740981	0.355	0.402	0.500443
Hist1h4c	2.17521e-05	0.0453405	0.104	0.075	0.504343
Gsdme	2.1851e-05	-0.0580872	0.209	0.252	0.506638
Oaz2	2.2418e-05	-0.0641665	0.225	0.267	0.519783
Skil	2.27771e-05	-0.0542959	0.163	0.202	0.52811
Ube2c	2.29818e-05	0.0764524	0.421	0.375	0.532856
Atxn7l3	2.30035e-05	-0.0430505	0.088	0.118	0.53336
Tagln3	2.33046e-05	-0.0713317	0.348	0.393	0.54034
Sumo3	2.33614e-05	-0.0459206	0.13	0.167	0.541657
Acly	2.36461e-05	-0.0634995	0.282	0.327	0.548258
Taco1	2.42965e-05	-0.0461213	0.131	0.166	0.563338
Cirbp	2.43243e-05	-0.0643598	0.311	0.357	0.563983
Hivep3	2.52991e-05	-0.0948596	0.583	0.63	0.586585
Ndufa12	2.53785e-05	-0.061615	0.263	0.308	0.588427
Csnk1g3	2.55364e-05	-0.0678402	0.496	0.555	0.592086
Arhgef26	2.58499e-05	0.0584894	0.127	0.095	0.599356
Shank3	2.64575e-05	-0.0455595	0.086	0.116	0.613445
Apba2	2.64971e-05	0.10588	0.657	0.628	0.614363
Cdk2ap1	2.6542e-05	-0.0552179	0.21	0.253	0.615403
Rps5	2.70803e-05	0.0716088	0.95	0.94	0.627884
Rgl1	2.7781e-05	-0.0575502	0.102	0.133	0.64413
Nova2	2.78208e-05	-0.0649406	0.415	0.465	0.645053
Gm16286	2.82573e-05	-0.0538499	0.196	0.237	0.655174
Bmerb1	2.87674e-05	-0.0885093	0.342	0.385	0.667001
Ddhd1	2.88772e-05	-0.0637471	0.182	0.221	0.669547
Pcyt1b	2.92595e-05	-0.0809605	0.215	0.255	0.678411
Nsmaf	2.93614e-05	-0.0671522	0.216	0.257	0.680773
Arhgef9	2.93753e-05	-0.0962943	0.354	0.394	0.681095
0610010K14Rik	2.99221e-05	-0.0519032	0.15	0.187	0.693775
Unc13a	2.99364e-05	-0.0558167	0.17	0.208	0.694105
Fdft1	3.06142e-05	-0.0576635	0.192	0.233	0.709822
Odc1	3.13027e-05	-0.0552964	0.17	0.208	0.725785
Ubl5	3.15224e-05	-0.0691791	0.32	0.365	0.730879
Zfp652	3.20947e-05	-0.0682193	0.365	0.415	0.744148
Cuedc1	3.2116e-05	-0.057243	0.18	0.22	0.744641
Snx7	3.26113e-05	0.0619709	0.121	0.091	0.756125
Impad1	3.27784e-05	-0.0568041	0.316	0.367	0.760001
Erc1	3.32069e-05	-0.0743434	0.494	0.539	0.769935
Arl5b	3.34227e-05	-0.0572003	0.311	0.358	0.77494
Phactr1	3.42282e-05	-0.105271	0.691	0.732	0.793615
Mfng	3.55626e-05	0.050883	0.19	0.151	0.824554
Madd	3.60171e-05	-0.0552165	0.174	0.213	0.835091
Camk1d	3.70925e-05	-0.150829	0.83	0.855	0.860028
Ppp1r14b	3.72614e-05	-0.0631495	0.514	0.571	0.863943
Sh3rf3	3.80846e-05	0.0632236	0.892	0.843	0.88303
Brd2	3.9882e-05	-0.058617	0.274	0.32	0.924704
Dlg1	4.00763e-05	0.101819	0.642	0.609	0.929209
Kif1b	4.06788e-05	0.0767439	0.857	0.847	0.943178
Slc8a3	4.08799e-05	-0.0713903	0.076	0.103	0.947841
Igfbp4	4.18235e-05	0.0611938	0.265	0.222	0.96972
Mast1	4.18682e-05	-0.0598573	0.228	0.27	0.970756
Epb41l3	4.19776e-05	-0.0899343	0.13	0.164	0.973293
Zfp1	4.20121e-05	-0.061755	0.195	0.234	0.974093
Sorbs1	4.26568e-05	-0.0793636	0.658	0.698	0.98904
Lcorl	4.30538e-05	0.115396	0.64	0.62	0.998244
Mafb	4.34825e-05	-0.0527209	0.126	0.16	1
Dixdc1	4.34857e-05	-0.0667326	0.172	0.209	1
Gpc6	4.37759e-05	0.186004	0.655	0.618	1
Mapre2	4.42549e-05	-0.077555	0.346	0.392	1
Chn1	4.43887e-05	-0.0849261	0.627	0.666	1
Cxxc4	4.61102e-05	-0.0702843	0.26	0.303	1
Tshz2	4.73323e-05	-0.0943256	0.107	0.138	1
Jun	4.7782e-05	0.0455761	0.107	0.078	1
Sesn3	4.83729e-05	-0.0675564	0.181	0.218	1
Rps9	4.84734e-05	0.0638265	0.977	0.969	1
Dbi	4.86296e-05	0.0895631	0.586	0.556	1
Unc5d	4.95497e-05	0.17762	0.379	0.334	1
Gng10	5.00368e-05	-0.0409394	0.108	0.14	1
Gpr158	5.02548e-05	-0.0564899	0.124	0.159	1
Fryl	5.04377e-05	-0.0664101	0.552	0.6	1
Tle5	5.05325e-05	-0.0571067	0.471	0.523	1
Lrp8	5.09142e-05	-0.0612651	0.341	0.388	1
Cdc42ep3	5.17241e-05	-0.0553809	0.133	0.167	1
Pqbp1	5.28484e-05	-0.0396818	0.103	0.134	1
Ppia	5.32532e-05	0.0734151	0.928	0.922	1
Srgap3	5.32935e-05	-0.0825729	0.818	0.851	1
Pabpn1	5.49029e-05	-0.0604099	0.629	0.682	1
Cnnm2	5.51037e-05	-0.049723	0.116	0.149	1
Mpped2	5.57387e-05	0.0606312	0.925	0.893	1
Alg10b	5.60841e-05	-0.0474835	0.124	0.157	1
Dexi	5.61456e-05	-0.0395171	0.092	0.122	1
Snrpf	5.64609e-05	-0.065258	0.375	0.423	1
Lrrc49	5.7303e-05	-0.0630845	0.433	0.48	1
Wscd2	5.76316e-05	-0.0670213	0.141	0.175	1
Snhg6	5.78967e-05	-0.0425298	0.11	0.142	1
Cacnb3	5.85855e-05	-0.0478401	0.149	0.185	1
Lrif1	5.90317e-05	-0.0576001	0.148	0.183	1
Trerf1	6.06907e-05	0.0884234	0.725	0.707	1
Yaf2	6.12964e-05	-0.058641	0.201	0.241	1
Mmp24	6.15806e-05	-0.0436048	0.101	0.131	1
Fkbp1a	6.19253e-05	-0.0592384	0.271	0.315	1
Hist1h3e	6.19546e-05	0.0664113	0.186	0.152	1
Ralgapa2	6.24635e-05	0.126095	0.556	0.529	1
Hist1h3c	6.43571e-05	0.047258	0.161	0.127	1
Rnf157	6.52997e-05	-0.0908884	0.318	0.357	1
Nptn	6.75439e-05	-0.0621674	0.419	0.468	1
Grcc10	6.77167e-05	-0.0588785	0.394	0.442	1
Tank	6.79707e-05	-0.0558007	0.116	0.147	1
Anp32e	6.80616e-05	0.0825728	0.419	0.38	1
Hist1h1c	6.99167e-05	0.0742122	0.282	0.243	1
Rpl18a	7.02316e-05	0.0701482	0.938	0.937	1
Ndufa6	7.08226e-05	-0.0671544	0.232	0.272	1
Stk39	7.12945e-05	-0.0401905	0.082	0.109	1
Brsk2	7.16325e-05	-0.054215	0.176	0.213	1
Steap2	7.21547e-05	-0.0410948	0.079	0.106	1
Cdc42se2	7.21642e-05	0.085065	0.548	0.515	1
Prkcz	7.24352e-05	-0.0481859	0.143	0.178	1
Nckap1	7.63346e-05	-0.0651238	0.386	0.436	1
Rnf14	7.67245e-05	-0.0626296	0.211	0.249	1
Thyn1	7.72905e-05	-0.0420463	0.094	0.123	1
Ssbp2	7.81106e-05	-0.0898702	0.82	0.843	1
Stat5b	8.06415e-05	-0.0474399	0.121	0.153	1
Clcn4	8.17434e-05	-0.0520212	0.273	0.318	1
Mrs2	8.28984e-05	-0.0421571	0.101	0.131	1
Rock2	8.31397e-05	-0.0614004	0.451	0.5	1
Serinc2	8.33196e-05	-0.0540367	0.241	0.282	1
Bhlhb9	8.39382e-05	-0.0557315	0.18	0.216	1
Rpl36al	8.46698e-05	-0.066583	0.298	0.34	1
Bax	8.59727e-05	-0.0605388	0.254	0.296	1
Yeats4	8.61999e-05	-0.0457684	0.251	0.295	1
Dram2	8.62832e-05	0.0445652	0.165	0.13	1
Sh3kbp1	8.65776e-05	0.0612622	0.266	0.225	1
Srp9	8.72032e-05	-0.0574927	0.19	0.227	1
Cdh4	8.75384e-05	-0.0618233	0.226	0.268	1
Arf3	8.82349e-05	-0.0440227	0.152	0.187	1
Slc43a2	8.88765e-05	-0.0476512	0.092	0.12	1
Eif4a2	8.9347e-05	-0.0525089	0.426	0.476	1
Igf1r	9.15544e-05	0.0620378	0.94	0.937	1
Plaa	9.2719e-05	-0.0490423	0.232	0.275	1
Tspan6	9.30764e-05	-0.0446431	0.17	0.207	1
Arf2	9.52382e-05	-0.0418199	0.089	0.117	1
Rffl	9.73684e-05	0.0516589	0.136	0.105	1
Shank2	9.81584e-05	-0.0697186	0.219	0.258	1
Clcn3	0.000101598	-0.0497157	0.373	0.424	1
Slc9a6	0.000103794	-0.0555443	0.144	0.177	1
Rnf130	0.000103941	-0.0634072	0.534	0.585	1
Crmp1	0.000104071	-0.072245	0.556	0.596	1
Celf3	0.00010597	-0.0692468	0.412	0.452	1
Arf1	0.000106048	-0.060363	0.297	0.341	1
Canx	0.000107531	-0.0556089	0.426	0.476	1
Lmbr1	0.000109602	-0.0694851	0.192	0.228	1
Vamp2	0.000110178	-0.0494563	0.154	0.189	1
Sp3	0.000110915	0.0857906	0.616	0.587	1
Ppp1r9a	0.000111984	-0.0757049	0.701	0.741	1
Tug1	0.00011386	-0.0582696	0.259	0.3	1
Kif21a	0.000116504	-0.0713785	0.569	0.614	1
E130308A19Rik	0.00011689	-0.0657534	0.653	0.708	1
Mettl4	0.000118257	-0.050965	0.12	0.151	1
Ska2	0.000119458	0.0651877	0.303	0.264	1
Heg1	0.000120312	0.0698335	0.23	0.193	1
Hist1h4h	0.000120328	0.0484612	0.143	0.112	1
Coro1c	0.000120548	0.0745399	0.415	0.371	1
Ndufb1-ps	0.000120888	-0.0538252	0.202	0.239	1
Zfp950	0.000121256	-0.056551	0.174	0.211	1
Smarcd1	0.000122231	-0.0498269	0.318	0.363	1
Amer2	0.000123389	-0.0677879	0.351	0.394	1
Fzd3	0.000123475	-0.0583052	0.595	0.646	1
Cadps	0.000123535	-0.0734201	0.717	0.755	1
Chd7	0.000124172	0.0906181	0.632	0.597	1
Cmpk1	0.000125502	-0.058898	0.298	0.341	1
Zdhhc14	0.000126542	-0.0766568	0.218	0.254	1
Tead1	0.000127078	-0.0643542	0.438	0.488	1
Ocrl	0.000127718	-0.0607413	0.17	0.204	1
Plag1	0.000127959	-0.0432192	0.097	0.125	1
Spc24	0.000128754	0.0442432	0.113	0.086	1
Gabrg2	0.000129253	-0.0769998	0.215	0.252	1
Drap1	0.000129285	-0.0459555	0.229	0.27	1
Rps21	0.0001302	-0.0676883	0.678	0.713	1
Usp29	0.000131701	-0.096622	0.464	0.512	1
Usp25	0.000132112	-0.0524925	0.128	0.16	1
Abhd18	0.000132675	-0.056852	0.221	0.26	1
Rab5if	0.000133304	-0.0579253	0.175	0.21	1
Kansl1	0.000137147	0.055155	0.934	0.936	1
Fry	0.000137828	-0.0691378	0.489	0.535	1
Ext1	0.000137906	-0.098446	0.588	0.625	1
Gabarapl1	0.000138531	-0.0427058	0.108	0.138	1
Mea1	0.0001386	-0.0433677	0.084	0.111	1
Frat1	0.000140519	-0.0408878	0.082	0.108	1
Tbl1xr1	0.000140803	-0.0638222	0.381	0.422	1
Srcin1	0.000141464	-0.0603331	0.254	0.293	1
Tma7	0.00014285	-0.0630081	0.386	0.43	1
Tmem256	0.000145301	-0.0422347	0.119	0.15	1
Atp2c1	0.000145875	-0.0579908	0.463	0.512	1
Phgdh	0.000146623	0.0360581	0.121	0.093	1
Klhl5	0.000148842	-0.0750648	0.245	0.281	1
Brms1l	0.000150528	-0.0493722	0.141	0.174	1
Ahdc1	0.00015079	-0.0504848	0.119	0.149	1
Npas3	0.000152903	0.125907	0.825	0.823	1
Gm42047	0.000153933	-0.066298	0.136	0.167	1
Rrm1	0.000154929	0.0568578	0.235	0.198	1
Lrrc59	0.000155758	-0.041238	0.109	0.139	1
Orc4	0.000160469	-0.0620418	0.377	0.424	1
Akt1	0.00016305	-0.0437837	0.146	0.18	1
Cpeb4	0.000165778	-0.0598143	0.393	0.439	1
Tmsb15b2	0.000166675	-0.0388044	0.083	0.109	1
Pcdh7	0.000167246	-0.138443	0.087	0.114	1
Sh3bp5	0.000168548	-0.057347	0.18	0.215	1
Ywhaz	0.000170939	-0.0579566	0.556	0.599	1
Igsf8	0.000171349	0.0530529	0.214	0.178	1
Rpn1	0.000171397	-0.0389555	0.125	0.157	1
Hacd3	0.000171794	-0.0483962	0.307	0.352	1
Cemip2	0.000174725	-0.0637079	0.387	0.432	1
Dlx1as	0.000175005	0.0892457	0.836	0.818	1
Cpeb2	0.000175326	0.0728926	0.343	0.302	1
Mif	0.000177015	-0.0564664	0.413	0.46	1
Fdps	0.000177639	-0.0584511	0.195	0.23	1
Ssr1	0.000178092	-0.0458854	0.216	0.255	1
Fam171a2	0.000179066	-0.0515362	0.175	0.209	1
Mdm4	0.000179434	-0.0619398	0.472	0.519	1
Fhod3	0.00017988	-0.044792	0.158	0.193	1
Calu	0.000180487	-0.0441623	0.198	0.235	1
Mark1	0.000181559	-0.0584481	0.42	0.464	1
Fabp7	0.000181934	0.0893889	0.472	0.438	1
Itm2b	0.000183803	-0.0572018	0.25	0.289	1
Cenpe	0.000183956	0.0810918	0.185	0.153	1
Bcl2l1	0.000184691	-0.0554736	0.25	0.29	1
Reps2	0.000184693	0.0669147	0.233	0.197	1
Mrpl52	0.000185986	-0.0735029	0.262	0.299	1
Rnf180	0.000186229	0.0773278	0.306	0.268	1
Epb41l1	0.000188157	-0.0493008	0.165	0.199	1
Exoc6b	0.000190133	0.0743919	0.815	0.804	1
Ptch1	0.000190922	-0.0605354	0.152	0.185	1
Etnk1	0.000195629	-0.066761	0.325	0.364	1
Pgrmc1	0.000196398	-0.0625669	0.39	0.434	1
Fam114a2	0.000196663	-0.0574329	0.303	0.343	1
Nfatc3	0.000196884	-0.0501869	0.189	0.226	1
Hba-a1	0.000198267	0.140496	0.088	0.114	1
Vmp1	0.000202997	-0.0600138	0.325	0.367	1
Taok3	0.000206749	-0.0474993	0.213	0.251	1
Pcnx2	0.000209213	-0.0491768	0.114	0.143	1
Birc5	0.000210699	0.0541478	0.181	0.149	1
Klhl2	0.000211343	-0.0529605	0.153	0.186	1
Gprasp1	0.000213547	-0.0501278	0.471	0.518	1
Sc5d	0.00021408	-0.0438213	0.096	0.123	1
Ecpas	0.000214825	-0.0710566	0.378	0.417	1
Faf1	0.000215592	-0.0674931	0.519	0.562	1
Kras	0.000217245	-0.071028	0.441	0.482	1
Cacnb4	0.000219714	0.113368	0.613	0.589	1
Atp5j	0.000222379	-0.0483047	0.487	0.544	1
Cycs	0.000222599	-0.0435016	0.165	0.2	1
Mtus1	0.00022443	-0.0534899	0.363	0.409	1
Gnl3l	0.000225485	-0.0522555	0.147	0.178	1
Pum2	0.000225692	0.0797252	0.775	0.752	1
Arhgap5	0.000227714	-0.0511157	0.331	0.374	1
Btbd10	0.00023077	-0.0765416	0.29	0.326	1
Ube2e2	0.000233268	-0.0578507	0.213	0.252	1
Ephb2	0.00023457	-0.072526	0.361	0.4	1
Strn4	0.000235027	-0.0449224	0.173	0.207	1
Scn1a	0.000237887	-0.0680277	0.152	0.184	1
Bmp1	0.000241554	-0.0375473	0.085	0.11	1
Atp2b4	0.00024312	-0.0531991	0.158	0.191	1
Nanos3	0.000243568	-0.0351201	0.077	0.101	1
Nusap1	0.000247622	0.0646377	0.167	0.135	1
Slc38a1	0.000253556	-0.049455	0.455	0.501	1
Dctn4	0.000260958	-0.0548402	0.362	0.404	1
Klhl23	0.000261418	-0.0450061	0.113	0.142	1
Mbd3	0.000261733	-0.0572122	0.249	0.287	1
Elob	0.000262836	-0.066341	0.502	0.542	1
Dlg4	0.000264392	-0.0493323	0.15	0.182	1
Fam216a	0.000264608	-0.0465929	0.14	0.172	1
Rras2	0.000267188	-0.0442011	0.076	0.1	1
Tlk2	0.0002687	-0.0582386	0.463	0.507	1
Lrrc4b	0.000272025	-0.0569872	0.311	0.351	1
Elavl4	0.000273098	-0.0546092	0.689	0.745	1
St6gal1	0.000274195	0.0714331	0.563	0.53	1
Rpl13	0.000275327	0.0577498	0.985	0.984	1
Tmx2	0.000276474	-0.0410669	0.112	0.141	1
Ywhah	0.00027654	-0.0484502	0.174	0.207	1
Svbp	0.000276624	-0.052956	0.254	0.293	1
Mageh1	0.000276832	-0.0517629	0.194	0.229	1
Trim13	0.000278305	0.0506905	0.172	0.141	1
Ergic3	0.000278399	-0.0532921	0.193	0.227	1
St3gal5	0.000282773	-0.0457296	0.11	0.138	1
Stx7	0.00028331	-0.0570552	0.233	0.269	1
Gipc1	0.000286043	-0.0430475	0.149	0.181	1
Rab11fip2	0.000287817	-0.0631851	0.302	0.342	1
Gabrb2	0.000287839	-0.0997227	0.138	0.168	1
Med12l	0.000289383	-0.0486404	0.076	0.1	1
Rnf187	0.000290933	-0.0629343	0.296	0.333	1
Cux1	0.00029172	0.0516817	0.914	0.916	1
Exoc5	0.00029323	-0.0698533	0.49	0.532	1
Cask	0.000294633	-0.0765632	0.568	0.617	1
Mettl9	0.000296576	-0.0605063	0.463	0.507	1
Mtcl1	0.000298051	-0.0660817	0.262	0.3	1
Acp1	0.000301373	-0.0496179	0.223	0.26	1
Zc3h12c	0.000304753	0.066745	0.574	0.53	1
Gab1	0.000305664	0.0499711	0.177	0.145	1
Rxylt1	0.000308007	-0.0457019	0.101	0.127	1
Smarca1	0.00030978	-0.0585901	0.122	0.15	1
Yes1	0.00031103	0.0754896	0.382	0.343	1
Miat	0.000311692	-0.0606463	0.557	0.6	1
Bcl11b	0.00031472	-0.0756645	0.942	0.941	1
Senp2	0.000315038	-0.0552937	0.233	0.268	1
Lrrtm1	0.000317543	-0.0482229	0.143	0.174	1
Evi5l	0.000318598	-0.0573525	0.233	0.268	1
Bmyc	0.000320873	-0.0384624	0.084	0.109	1
B230219D22Rik	0.000321982	-0.0504634	0.303	0.344	1
Fam13c	0.000322269	0.0526893	0.273	0.235	1
Lrrc28	0.000329899	-0.0594962	0.332	0.372	1
Ntrk2	0.000330039	-0.127205	0.417	0.451	1
Fjx1	0.000341197	-0.0389034	0.076	0.1	1
Phf21a	0.000343601	0.057227	0.871	0.851	1
Golgb1	0.000343921	-0.0665994	0.338	0.374	1
Gm28175	0.000345239	-0.0440607	0.136	0.167	1
Ndufaf3	0.000345446	-0.0347488	0.092	0.118	1
Atp5md	0.000348566	-0.0517176	0.249	0.285	1
Dcun1d4	0.000350069	-0.0475669	0.162	0.194	1
Ppib	0.000350188	-0.0615868	0.408	0.445	1
Camk2n2	0.000350582	-0.0335919	0.08	0.105	1
Adamts5	0.000351503	0.0794345	0.308	0.271	1
Psmc4	0.000351556	-0.0540099	0.233	0.268	1
Hist1h1a	0.000352524	0.0457546	0.132	0.105	1
Nudcd3	0.000354447	-0.0518747	0.415	0.459	1
Syt14	0.00036657	-0.0695012	0.567	0.606	1
Snrpe	0.000370093	-0.0553095	0.512	0.56	1
Peg3	0.000372209	-0.0751319	0.375	0.417	1
Timm17b	0.000373889	-0.0472866	0.132	0.162	1
Trp53bp1	0.000374042	-0.047262	0.499	0.551	1
Micos10	0.000374674	-0.0590466	0.346	0.385	1
Hnrnpdl	0.00037732	-0.0632896	0.592	0.634	1
Gm39214	0.000383414	-0.0394514	0.078	0.101	1
Arglu1	0.000386102	-0.0469592	0.626	0.679	1
B230216N24Rik	0.00038843	0.0358017	0.117	0.09	1
Pafah1b3	0.000391775	-0.0608711	0.447	0.487	1
Sqle	0.000396059	-0.0474923	0.139	0.169	1
Nkain4	0.000397089	-0.0394429	0.137	0.168	1
S100a10	0.000402691	0.0558847	0.186	0.155	1
Hmg20a	0.000403184	-0.0574456	0.423	0.466	1
mt-Nd4	0.000404097	-0.064001	0.991	0.995	1
Acvr1b	0.000405235	-0.0461101	0.171	0.203	1
Pcnx	0.000407471	-0.0473465	0.336	0.38	1
Hmgn5	0.000414461	0.0427964	0.186	0.153	1
Prickle2	0.000416195	-0.0631397	0.103	0.129	1
Lbh	0.000423832	-0.0473871	0.126	0.154	1
Snx25	0.000424767	-0.0428236	0.116	0.144	1
Podxl2	0.000428638	-0.0517673	0.502	0.548	1
Maco1	0.000429122	-0.0598623	0.663	0.703	1
Ncoa2	0.000443358	-0.0687553	0.617	0.648	1
Asb8	0.000445075	-0.0335001	0.078	0.102	1
Rybp	0.00044512	-0.0488548	0.308	0.35	1
Atp6ap2	0.000447201	-0.0415485	0.211	0.248	1
Ubc	0.000448945	-0.0576842	0.484	0.53	1
Nyap1	0.000459122	-0.0408805	0.146	0.176	1
Cks2	0.000459489	0.0640069	0.228	0.196	1
Gm10544	0.000465871	-0.0400965	0.085	0.109	1
Tmem200a	0.000468011	-0.074709	0.146	0.176	1
Meis2	0.000470103	-0.00995439	0.259	0.298	1
Camk2g	0.000470904	-0.0492425	0.161	0.193	1
Dcbld2	0.000473058	-0.0342528	0.078	0.102	1
Pcna	0.00047875	0.0798346	0.359	0.328	1
Rtl8a	0.000480769	-0.0406338	0.116	0.144	1
Adipor2	0.000485515	-0.0511636	0.194	0.227	1
Apba1	0.000493729	0.102943	0.441	0.408	1
Mir124a-1hg	0.000499509	-0.0627071	0.679	0.707	1
Anp32b	0.000500728	0.0767177	0.357	0.324	1
Atp6v1g1	0.000503967	-0.052688	0.392	0.433	1
Timm8b	0.00050637	-0.0557608	0.265	0.302	1
Arl2bp	0.000513315	-0.0446346	0.159	0.19	1
Pomp	0.000518003	-0.0560987	0.329	0.369	1
Il1rapl1	0.000523439	-0.13358	0.579	0.616	1
Ndufa10	0.000523721	-0.0529653	0.276	0.313	1
Mcf2l	0.000532308	-0.0604932	0.361	0.4	1
Flrt3	0.000534758	-0.0368778	0.085	0.109	1
Atg4c	0.000538361	-0.0515532	0.116	0.142	1
Trim32	0.000538804	-0.0353335	0.08	0.104	1
Camkk2	0.000538877	-0.0382733	0.093	0.118	1
Tspan11	0.000539392	0.0439492	0.146	0.118	1
Plxnc1	0.000539961	-0.0558316	0.302	0.34	1
Fem1c	0.000540913	0.040058	0.229	0.193	1
Wbp4	0.000546273	-0.0517999	0.294	0.332	1
Prkacb	0.000546635	-0.0606203	0.434	0.474	1
Mapk8ip1	0.000551824	-0.0412294	0.099	0.124	1
Rpl35	0.00055569	-0.0465314	0.378	0.421	1
Thap12	0.000555937	-0.0477069	0.145	0.174	1
Tspoap1	0.000558244	-0.040042	0.115	0.143	1
Acsl3	0.000560071	-0.0459316	0.156	0.186	1
Ndufb2	0.000561748	-0.0438946	0.171	0.204	1
Lima1	0.000562642	-0.0634595	0.456	0.495	1
Mkln1	0.000567516	0.0834918	0.603	0.581	1
Reep1	0.000570975	-0.0657473	0.34	0.377	1
Cpeb3	0.000573708	-0.0581792	0.343	0.381	1
Rpl7	0.00057503	0.0632874	0.941	0.934	1
Tex10	0.000580561	-0.0457748	0.162	0.193	1
Micu3	0.000590126	-0.0482612	0.281	0.319	1
Efna5	0.000595906	-0.113683	0.731	0.754	1
Stag2	0.000599766	0.0720859	0.51	0.478	1
Snap25	0.000602101	-0.0441469	0.366	0.412	1
Znrf1	0.000604306	-0.0570775	0.621	0.663	1
Alkbh8	0.0006068	-0.0572519	0.294	0.33	1
Wsb1	0.000610238	-0.0524502	0.588	0.632	1
Fgfr2	0.000614565	-0.0517323	0.561	0.613	1
Myo1b	0.000618793	0.080522	0.668	0.634	1
Atad2	0.000623227	0.0661548	0.129	0.103	1
Dvl1	0.000624805	-0.0407014	0.116	0.143	1
Vps37a	0.000627785	-0.0478699	0.197	0.231	1
Cdh2	0.000631155	0.0612517	0.914	0.908	1
Zfp983	0.000642075	-0.0363011	0.089	0.114	1
Appl1	0.000642623	-0.0497785	0.399	0.44	1
Rtf1	0.000646853	-0.0575941	0.542	0.586	1
Dtnb	0.000648517	-0.0546645	0.258	0.297	1
Slain2	0.000655924	-0.0485549	0.349	0.388	1
Slc24a5	0.000656455	-0.0432564	0.151	0.181	1
Arhgef12	0.000657405	-0.0685566	0.616	0.648	1
Prdx5	0.000657998	-0.0460224	0.173	0.204	1
Cox8a	0.000659155	-0.0508561	0.472	0.517	1
Polb	0.000666181	-0.0607346	0.487	0.528	1
Naa30	0.00066788	-0.0435068	0.144	0.173	1
Chtop	0.000668824	-0.0590476	0.289	0.324	1
Ppp2r1a	0.000670984	-0.0505411	0.25	0.286	1
Gm12353	0.000674426	-0.0315691	0.148	0.179	1
Fgf12	0.000675291	0.123237	0.227	0.197	1
Atrn	0.000675671	-0.0497117	0.305	0.344	1
Brd1	0.000676477	-0.0485403	0.486	0.537	1
Stmn2	0.000686549	-0.0700103	0.708	0.753	1
Spin1	0.000687678	-0.0453704	0.403	0.444	1
Slc6a1	0.000689398	0.0720307	0.711	0.696	1
Mcrip1	0.000692339	-0.0349877	0.163	0.195	1
Grb10	0.000703385	0.0527636	0.277	0.242	1
Hmgn2	0.000705428	0.0722575	0.52	0.491	1
Mrpl55	0.000716657	-0.0345894	0.101	0.127	1
Slc22a17	0.000716992	-0.0418336	0.186	0.219	1
D430019H16Rik	0.000717466	-0.0519141	0.291	0.327	1
Sppl2a	0.000720341	-0.0421342	0.291	0.33	1
Clptm1l	0.000725089	-0.0382281	0.12	0.147	1
Tapt1	0.000732515	-0.0300768	0.099	0.125	1
Pak1	0.000733872	-0.0531752	0.478	0.523	1
Mob4	0.000737296	-0.0536414	0.349	0.388	1
Prxl2a	0.000737577	-0.0416879	0.103	0.128	1
Tsc1	0.000741891	-0.0421774	0.258	0.296	1
Erlec1	0.000743802	-0.0383503	0.249	0.286	1
Rhobtb3	0.00074504	-0.0629186	0.481	0.519	1
Tmem132a	0.000755989	-0.0511109	0.226	0.259	1
C1d	0.00075984	-0.0374096	0.17	0.201	1
Lrch3	0.000767906	0.0815896	0.578	0.564	1
Jam2	0.000773861	0.0226161	0.122	0.096	1
Pou3f4	0.000773917	-0.0688415	0.376	0.413	1
Zfyve9	0.00077685	-0.0502467	0.441	0.487	1
Grik3	0.000784926	-0.0787037	0.691	0.719	1
Setbp1	0.0007852	-0.0735095	0.996	0.992	1
Smarca2	0.000791463	-0.0653816	0.388	0.424	1
Slc6a6	0.000793542	-0.0510006	0.281	0.317	1
Gabra2	0.00079812	0.0379917	0.177	0.146	1
Pik3r1	0.00080982	-0.050841	0.106	0.131	1
Sec23ip	0.000810806	-0.0385409	0.137	0.165	1
Hsd17b12	0.000812174	-0.0472942	0.287	0.326	1
Gm14964	0.000812791	0.0532606	0.303	0.268	1
Pcdh10	0.000817316	-0.0442674	0.086	0.109	1
Mapkap1	0.000823395	-0.0503696	0.311	0.351	1
Caap1	0.000823946	-0.0483925	0.252	0.289	1
Cks1b	0.000828939	0.0452669	0.184	0.154	1
Srek1	0.0008395	-0.0368814	0.584	0.633	1
Mtpn	0.000843964	-0.0472844	0.225	0.26	1
Zranb1	0.000849354	-0.0504838	0.394	0.436	1
Tmem59	0.000853897	-0.0587908	0.453	0.491	1
Zcchc18	0.000858665	-0.0551084	0.244	0.278	1
Ctdnep1	0.000867906	-0.0308532	0.082	0.105	1
Map1b	0.000868251	0.0463224	0.985	0.986	1
Ythdc1	0.00087016	-0.0560956	0.541	0.584	1
Mrpl43	0.000875142	-0.0414719	0.179	0.211	1
Atg10	0.000877978	-0.058704	0.216	0.249	1
L3mbtl3	0.000879567	-0.0638895	0.257	0.29	1
Rpl10a	0.000887743	0.063012	0.788	0.77	1
Ndufb5	0.000891779	-0.0396452	0.351	0.392	1
Tbc1d19	0.000892441	-0.0462347	0.217	0.251	1
Pfkm	0.00089294	-0.0303987	0.086	0.11	1
Impact	0.000897283	-0.0389089	0.16	0.191	1
Scrt1	0.000898038	-0.0547027	0.25	0.284	1
Uqcrh	0.000904808	-0.0594115	0.592	0.628	1
Eif4g3	0.000910061	-0.0615127	0.692	0.725	1
Rabgap1l	0.000911448	-0.0970037	0.433	0.466	1
Ube2h	0.000917317	0.0865818	0.713	0.689	1
Uchl1	0.000918014	-0.0541627	0.459	0.504	1
Scaper	0.000919222	-0.072215	0.61	0.642	1
Pex7	0.000919879	-0.0383419	0.094	0.118	1
Phtf2	0.000922497	-0.0611017	0.282	0.314	1
Rab28	0.000922567	-0.0369704	0.298	0.338	1
Gdap1l1	0.000926808	-0.0404709	0.165	0.195	1
Cttn	0.000952902	-0.0454085	0.23	0.264	1
Tubb4a	0.000957652	-0.0490661	0.22	0.253	1
Cspp1	0.000958348	-0.0525716	0.552	0.594	1
Pik3c2b	0.000958505	-0.0334139	0.167	0.198	1
Mier1	0.000966364	-0.0508214	0.269	0.304	1
Uso1	0.000968821	-0.0524503	0.252	0.286	1
Swi5	0.000973076	-0.0477929	0.27	0.307	1
Ehmt1	0.000976215	0.0643998	0.795	0.782	1
Pdcl	0.000982025	-0.0338055	0.14	0.169	1
Mrpl11	0.000982424	-0.041656	0.167	0.198	1
Atp13a3	0.00099972	-0.0429987	0.235	0.27	1
Snrpg	0.000999858	-0.049874	0.414	0.459	1
Nrxn2	0.00101069	-0.0642082	0.594	0.628	1
Nme1	0.00101743	-0.0648699	0.416	0.447	1
Arl15	0.00103011	-0.049962	0.516	0.561	1
Ahcyl1	0.00103122	-0.0416943	0.338	0.379	1
Irak1bp1	0.00103481	-0.0296483	0.091	0.115	1
Nbas	0.00104305	-0.047851	0.251	0.286	1
Pigk	0.00105823	-0.0366818	0.118	0.145	1
Usf3	0.00105993	-0.0477302	0.186	0.217	1
Kpna3	0.00106141	0.0857997	0.561	0.541	1
Apc2	0.00106597	-0.0463662	0.371	0.408	1
Lhfpl4	0.00106965	-0.0441425	0.167	0.197	1
Arpc5l	0.0010712	-0.0451918	0.181	0.212	1
Ube2n	0.00107405	-0.0495615	0.416	0.455	1
Faxc	0.00107958	-0.0440176	0.232	0.266	1
Clstn1	0.00108569	-0.0405136	0.221	0.256	1
Kitl	0.00109117	-0.0650074	0.182	0.213	1
Cdk19	0.00110311	0.0774539	0.508	0.48	1
Map1lc3a	0.00111299	-0.0379142	0.169	0.2	1
Zfp292	0.00112717	0.0681723	0.839	0.849	1
Trim46	0.00113205	-0.0539537	0.208	0.238	1
Pkn2	0.00113412	0.0759163	0.581	0.558	1
Med13l	0.00113692	-0.0451646	0.592	0.638	1
Vezt	0.00113872	-0.0484064	0.504	0.546	1
5430405H02Rik	0.00114246	-0.040222	0.27	0.307	1
Efhd2	0.00114648	0.044425	0.109	0.087	1
Akap8l	0.00115657	0.0513487	0.419	0.38	1
Tcp11l1	0.00115681	-0.0517729	0.224	0.257	1
Tmed10	0.00116072	-0.0443423	0.289	0.327	1
Chst10	0.00116328	-0.0342776	0.091	0.114	1
Epc2	0.00116437	-0.0662507	0.536	0.565	1
Dynll1	0.00116507	-0.0520627	0.607	0.653	1
Stk16	0.00117202	-0.0352648	0.104	0.129	1
Mdn1	0.00117445	-0.0468514	0.236	0.27	1
Sh3gl2	0.00117511	0.0645802	0.179	0.151	1
Gnai1	0.00118009	0.0487952	0.19	0.16	1
Cdc20	0.0011851	0.0415736	0.149	0.122	1
H2afy2	0.00118885	-0.0396595	0.533	0.577	1
Lasp1	0.00119249	-0.0327055	0.086	0.108	1
Ugcg	0.00119391	-0.0411307	0.178	0.208	1
Slc25a25	0.00120483	-0.0334411	0.088	0.111	1
Ssr3	0.00121013	-0.0476408	0.259	0.293	1
Snhg14	0.00121485	-0.0681816	0.62	0.655	1
Wdfy1	0.00122203	-0.0323402	0.085	0.107	1
Rpl22l1	0.0012234	-0.0437698	0.354	0.395	1
Rab11b	0.00122934	-0.0481119	0.376	0.416	1
Apip	0.00123255	-0.0326159	0.088	0.11	1
Tomm6	0.00123866	-0.0517695	0.196	0.225	1
Col11a1	0.00124702	-0.045878	0.286	0.323	1
Tmem128	0.00125151	-0.0425582	0.189	0.219	1
Arf4	0.00126365	-0.0515053	0.412	0.452	1
Bcl2	0.00127518	-0.0601036	0.149	0.177	1
Sil1	0.0012775	-0.0458558	0.159	0.188	1
Gls	0.00127859	-0.0494409	0.457	0.501	1
Ctif	0.00128493	-0.0332321	0.46	0.505	1
Fam135a	0.00128983	-0.0410915	0.264	0.302	1
Chd2	0.00129542	-0.0872206	0.75	0.774	1
Fam89b	0.00129683	-0.0361526	0.221	0.255	1
Ankrd50	0.00130104	0.0681391	0.335	0.304	1
Hbp1	0.00132396	0.046089	0.276	0.241	1
Ndufs1	0.00133217	-0.0448356	0.268	0.304	1
Dtna	0.00133513	0.0439659	0.106	0.083	1
Ralgps2	0.00135233	-0.0597099	0.389	0.427	1
Gm26936	0.00135741	0.0674535	0.47	0.435	1
Hist2h2ac	0.00135931	0.0377862	0.169	0.141	1
Galnt11	0.00136685	-0.0451424	0.152	0.18	1
Atp6v1f	0.00136699	-0.0417975	0.257	0.292	1
Fem1b	0.0013676	-0.0471898	0.193	0.223	1
Rps15a	0.00137156	-0.0580592	0.888	0.903	1
Gm49003	0.00138123	0.0373024	0.243	0.21	1
Gsk3a	0.00138387	-0.0343051	0.1	0.124	1
Ndufc1	0.00138519	-0.0477831	0.235	0.267	1
Fam8a1	0.00140885	-0.0401086	0.153	0.181	1
Rgs7bp	0.00141381	-0.0461973	0.116	0.14	1
Polr2i	0.001415	-0.0393148	0.146	0.174	1
2810410L24Rik	0.00142403	-0.0429605	0.151	0.179	1
Zfp2	0.00142705	-0.0478483	0.18	0.209	1
Lmo3	0.00142964	0.0137479	0.479	0.437	1
Ndufs5	0.00143132	-0.0410064	0.315	0.353	1
Cox10	0.00143229	-0.0412991	0.091	0.114	1
Haghl	0.00143651	-0.0399036	0.124	0.15	1
Marcks	0.00143654	0.0486464	0.947	0.944	1
Ube2j2	0.00144052	-0.0378439	0.242	0.276	1
Ostm1	0.00144814	-0.0786976	0.213	0.242	1
Dnaja2	0.00147506	-0.0437607	0.285	0.321	1
Rbm15b	0.00147755	-0.0406198	0.128	0.154	1
Ap1ar	0.00148263	-0.047389	0.211	0.242	1
Dgke	0.00149475	-0.039618	0.092	0.114	1
Tmem33	0.00150511	-0.0402894	0.219	0.252	1
2410004B18Rik	0.00151161	-0.0383652	0.124	0.15	1
Hfm1	0.00153001	-0.0387323	0.111	0.136	1
Gab2	0.00154533	0.0792005	0.356	0.322	1
Stim1	0.0015553	-0.0463776	0.105	0.129	1
Abhd2	0.00155901	-0.0492178	0.206	0.237	1
Ahi1	0.00155954	-0.0549237	0.449	0.49	1
Tnfrsf21	0.00156429	-0.0398027	0.177	0.206	1
Dact1	0.00159357	-0.0422646	0.128	0.153	1
Zfp113	0.00159527	-0.0410628	0.181	0.211	1
Prkar2b	0.00159711	-0.0585419	0.301	0.337	1
Sdhd	0.001602	-0.0328532	0.127	0.153	1
Rplp2	0.0016091	-0.0470421	0.787	0.821	1
Fbxw2	0.00163104	-0.0430121	0.244	0.277	1
Btbd1	0.00163298	-0.0451556	0.344	0.384	1
Adrm1	0.00164239	-0.0278363	0.081	0.103	1
Serf2	0.00166254	-0.0531316	0.528	0.57	1
Srebf2	0.00167069	-0.0471858	0.28	0.313	1
Gm12068	0.00167198	-0.0606689	0.168	0.197	1
Golph3	0.00168757	-0.0359754	0.13	0.156	1
Stxbp5l	0.0016912	-0.039708	0.088	0.111	1
Cotl1	0.00170766	-0.0321429	0.08	0.102	1
Rpl36a	0.00171314	-0.0586731	0.447	0.483	1
Wbp1	0.00175546	-0.0512726	0.264	0.296	1
Abr	0.00176581	-0.0469453	0.316	0.351	1
Ndufa5	0.00177761	-0.0383599	0.204	0.236	1
Cdyl2	0.00178662	-0.0469438	0.086	0.108	1
2610507B11Rik	0.00178708	-0.0396031	0.14	0.167	1
Vti1b	0.0017876	-0.0443597	0.194	0.224	1
Map2k5	0.00178895	-0.0424357	0.343	0.382	1
Nfx1	0.00179158	-0.0443138	0.314	0.348	1
Ppp2ca	0.00179541	-0.0444448	0.419	0.462	1
Shkbp1	0.00180484	-0.0376363	0.101	0.124	1
Neil3	0.00180951	0.0417092	0.107	0.085	1
Edf1	0.00181236	-0.0416658	0.296	0.332	1
Ifnar2	0.00181262	0.0484869	0.198	0.169	1
Gm42695	0.00181502	0.0285785	0.111	0.088	1
Gm13052	0.00183668	-0.0304477	0.087	0.109	1
Chmp1a	0.00184002	-0.0319262	0.087	0.109	1
Ubb	0.00185653	0.0539513	0.964	0.967	1
Ppp1r11	0.00187823	-0.0366835	0.199	0.23	1
Ccnl2	0.00190139	-0.0309593	0.396	0.441	1
Camk2n1	0.00190923	-0.0410256	0.131	0.156	1
Rhobtb2	0.00191545	-0.0313671	0.11	0.134	1
Chchd3	0.00192557	-0.0545536	0.556	0.592	1
Calm3	0.00194047	-0.0458177	0.395	0.434	1
Matr3	0.00195274	-0.0419393	0.549	0.599	1
Psmd3	0.0019734	-0.0374334	0.132	0.158	1
Svop	0.00197424	-0.0522262	0.495	0.53	1
Slc44a1	0.00197427	-0.0327035	0.111	0.136	1
Nol4l	0.00197516	-0.0304326	0.122	0.148	1
Cox6b1	0.00199713	-0.0502369	0.492	0.525	1
Eea1	0.00199724	-0.0378269	0.177	0.207	1
Cox7a2	0.00200558	-0.0549437	0.473	0.509	1
Sft2d1	0.00201057	-0.0385307	0.127	0.152	1
Sos2	0.0020117	-0.0598629	0.278	0.309	1
Xrcc5	0.00202475	0.0525378	0.203	0.175	1
Clasp1	0.00204105	0.0598429	0.854	0.845	1
Lars2	0.00207022	-0.0574462	0.402	0.435	1
Atat1	0.00208536	-0.04302	0.576	0.62	1
Proser1	0.00208706	-0.0417521	0.243	0.275	1
Mllt6	0.00209003	-0.0292611	0.085	0.106	1
Gm26944	0.00209451	-0.0374021	0.133	0.159	1
Hnrnpu	0.00209706	0.0534346	0.819	0.811	1
Eif4e	0.00209971	-0.049205	0.309	0.343	1
Mlf2	0.00211153	-0.0397066	0.203	0.233	1
Dab2ip	0.00211362	-0.0429896	0.203	0.233	1
Cers5	0.00212453	-0.0498042	0.295	0.328	1
Prim1	0.00216375	0.0365975	0.133	0.108	1
Dmxl1	0.00216386	-0.0545577	0.562	0.593	1
Rtraf	0.00216687	0.0704502	0.562	0.538	1
Hace1	0.00219162	-0.0515867	0.245	0.276	1
Prpf4b	0.00219623	-0.0554197	0.616	0.655	1
1700025G04Rik	0.00220106	-0.059376	0.248	0.278	1
Smc2	0.00221353	0.0682843	0.276	0.247	1
Dip2c	0.00227232	0.061246	0.981	0.986	1
Atxn7l1	0.00227735	-0.0370474	0.279	0.314	1
Sgpl1	0.00229316	-0.0396107	0.211	0.242	1
Cfap20	0.00230702	-0.0357403	0.15	0.177	1
Gorasp2	0.00231011	-0.0393148	0.137	0.162	1
Dock11	0.00231362	0.0638233	0.516	0.481	1
Zfp516	0.00231424	-0.0590796	0.463	0.497	1
Pdp1	0.00231787	-0.0332871	0.087	0.108	1
Diaph2	0.00231869	0.0878838	0.27	0.239	1
Rab4b	0.00232298	-0.0276266	0.089	0.111	1
Lrp6	0.00235828	-0.0475878	0.443	0.48	1
Akna	0.00237295	0.0328685	0.1	0.079	1
Wdr6	0.00238177	-0.0402875	0.165	0.193	1
Preb	0.00238437	-0.0318153	0.156	0.185	1
Ccl27a	0.00239274	-0.0322681	0.12	0.144	1
Wdr37	0.0024031	-0.0368705	0.268	0.302	1
Cyb5b	0.00240979	-0.0442624	0.168	0.195	1
Nell1	0.00241179	-0.120837	0.139	0.164	1
6330403K07Rik	0.00245761	-0.0545828	0.541	0.579	1
Gbf1	0.0024732	-0.0581928	0.46	0.495	1
1700028E10Rik	0.00247597	0.0310161	0.107	0.085	1
Dgki	0.00252886	-0.0734574	0.461	0.495	1
Prkar2a	0.00255321	-0.0420564	0.151	0.177	1
Hpf1	0.00255697	-0.0379165	0.246	0.279	1
App	0.00255728	-0.0574648	0.636	0.664	1
Jade1	0.00258966	-0.0393481	0.1	0.122	1
Ttc14	0.00259679	-0.0383985	0.413	0.454	1
Naa20	0.00260621	-0.0342901	0.196	0.226	1
Cacng2	0.00261669	-0.0438577	0.184	0.213	1
Nop10	0.00262738	-0.0405212	0.15	0.176	1
Psd2	0.00264984	-0.0447064	0.222	0.252	1
Med27	0.0026499	-0.0428355	0.205	0.235	1
Uhrf1bp1l	0.00265214	-0.0493918	0.227	0.256	1
Tuba1b	0.00269869	0.0609433	0.45	0.418	1
Nipa1	0.00273348	-0.041626	0.139	0.164	1
Arfgap1	0.0027491	-0.0347574	0.157	0.184	1
Mff	0.00275263	-0.0333934	0.368	0.408	1
Api5	0.00275766	-0.0449662	0.215	0.244	1
Uba2	0.00276958	-0.0385395	0.275	0.309	1
Gna13	0.00277799	-0.0416411	0.159	0.185	1
Mtch1	0.00280473	-0.032302	0.327	0.366	1
Rps23	0.00280638	-0.0577688	0.944	0.953	1
A830082K12Rik	0.00282563	0.0420637	0.148	0.122	1
Ndufa4	0.00282812	-0.0428775	0.59	0.64	1
Aimp1	0.00285948	-0.0498412	0.28	0.311	1
Armh3	0.00286996	-0.0440628	0.32	0.356	1
Fads2	0.00287059	-0.0410432	0.254	0.286	1
Pdpk1	0.0028876	-0.0464526	0.281	0.312	1
Scamp5	0.00288924	-0.0433931	0.204	0.233	1
Sept7	0.00289549	0.0724683	0.622	0.612	1
Slc30a9	0.00294067	-0.0466233	0.315	0.347	1
Eif5b	0.00295061	-0.0496786	0.402	0.436	1
Dek	0.00295545	0.0656548	0.425	0.398	1
Map2k2	0.00296399	-0.0515952	0.267	0.297	1
Arid4a	0.00296888	-0.0481884	0.511	0.55	1
Trappc11	0.00297921	-0.0297422	0.123	0.147	1
Mtmr1	0.0029837	-0.0433733	0.204	0.232	1
Lrrc4	0.00298541	-0.0291405	0.206	0.238	1
Ap2s1	0.00299408	-0.0407233	0.313	0.346	1
1110051M20Rik	0.00299807	-0.0603006	0.385	0.418	1
Trp53inp1	0.0030012	-0.0419849	0.208	0.238	1
Acvr1	0.00302263	0.0652357	0.324	0.294	1
Prr14l	0.00302555	0.0606415	0.381	0.35	1
Morf4l2	0.00303845	-0.0442847	0.425	0.461	1
Tcf25	0.00306155	-0.040489	0.309	0.342	1
Pdhx	0.00306506	-0.0348851	0.151	0.177	1
Rab6a	0.00306941	-0.0466143	0.301	0.333	1
Chmp4b	0.00307564	-0.0384588	0.186	0.214	1
Glrx5	0.00307601	-0.0388018	0.143	0.168	1
Rad23a	0.00307939	-0.033144	0.102	0.125	1
Gna12	0.003106	-0.0306795	0.149	0.176	1
Bcl2l13	0.00311855	-0.0415416	0.172	0.199	1
Tmem147	0.00314159	-0.0439675	0.15	0.175	1
Cept1	0.00315423	0.0549628	0.255	0.226	1
Rbm25	0.00315989	-0.0363941	0.778	0.814	1
Gstm7	0.00320104	-0.0319069	0.124	0.148	1
Atpif1	0.00320202	-0.0366179	0.666	0.71	1
Kif3a	0.0032188	-0.0418435	0.41	0.447	1
Crcp	0.00323284	-0.0274877	0.089	0.11	1
Ndfip1	0.00325305	-0.0467796	0.603	0.635	1
St6gal2	0.00325523	-0.049534	0.115	0.138	1
Zc3h14	0.00325642	-0.0546912	0.337	0.367	1
2810013P06Rik	0.00325854	-0.0317128	0.093	0.115	1
Bach2	0.00326521	0.0948147	0.67	0.659	1
Arhgef11	0.00330819	-0.0479308	0.474	0.509	1
Acap2	0.00331569	0.0639816	0.456	0.428	1
Kctd13	0.00333889	-0.0287029	0.083	0.103	1
Ccdc34	0.00334607	-0.0499958	0.356	0.39	1
Fyttd1	0.00335005	-0.0477876	0.276	0.307	1
Rnf138	0.00335566	-0.0422947	0.333	0.367	1
Uqcr11	0.0033643	-0.0409421	0.231	0.261	1
Ndufv2	0.00340323	-0.0425258	0.405	0.44	1
Psmd14	0.00341735	-0.0445006	0.451	0.488	1
Kit	0.00342736	-0.0310196	0.102	0.124	1
Rnps1	0.00344013	-0.0356575	0.27	0.303	1
Zfp617	0.0034485	-0.0332585	0.145	0.17	1
Kdm4c	0.00346122	-0.0386569	0.465	0.51	1
Ywhag	0.003469	-0.0461393	0.448	0.483	1
Zfp612	0.00348289	-0.0368238	0.122	0.146	1
Romo1	0.00348605	-0.0366197	0.164	0.191	1
Ksr1	0.00349556	0.0460008	0.254	0.224	1
Ost4	0.00349653	-0.03031	0.143	0.168	1
Gm13889	0.00349819	-0.0641012	0.295	0.321	1
Foxo6	0.0035001	-0.0309402	0.081	0.1	1
Tmem9	0.003528	-0.0292886	0.096	0.118	1
Rpl29	0.0035745	0.0537796	0.879	0.874	1
Rpl11	0.00357658	0.0518191	0.934	0.936	1
Kctd3	0.00359104	-0.0343715	0.136	0.161	1
Hist3h2ba	0.00362332	-0.0514636	0.648	0.678	1
Nr2e1	0.00363615	-0.0545788	0.106	0.128	1
Mapre1	0.00364761	-0.0393148	0.35	0.386	1
Psmc2	0.00365673	-0.0335658	0.227	0.258	1
Map4	0.0036791	0.0591509	0.437	0.404	1
Brd7	0.0036935	-0.0322383	0.259	0.292	1
Mdh1	0.00374163	-0.0431953	0.319	0.351	1
Ndufb7	0.00374782	-0.0556883	0.336	0.366	1
Tmem65	0.00375452	-0.0541986	0.146	0.17	1
Fbxo10	0.0037705	-0.0339106	0.105	0.127	1
Esd	0.00377439	-0.0385531	0.262	0.293	1
Cops6	0.00380101	-0.04037	0.175	0.201	1
Rpl13a	0.00381159	0.0482981	0.942	0.939	1
Vapb	0.00383853	-0.0331924	0.152	0.178	1
Mapk4	0.00384953	-0.0612902	0.262	0.291	1
4931428F04Rik	0.0038622	-0.0323269	0.111	0.133	1
Tnks2	0.00386224	-0.0473658	0.584	0.619	1
Wdr70	0.00389774	-0.0482524	0.342	0.378	1
Wnk2	0.00390458	-0.0551713	0.453	0.484	1
Plxna4	0.00391558	-0.129779	0.866	0.86	1
Rnf11	0.00395006	-0.0407746	0.209	0.238	1
Osbp	0.003962	-0.034932	0.149	0.174	1
Cox7b	0.00399257	-0.0339967	0.378	0.415	1
Fam126a	0.00399879	0.0515989	0.212	0.185	1
B4galnt4	0.00400176	-0.0343323	0.107	0.128	1
Tnrc6b	0.00400545	0.0441459	0.838	0.836	1
Npc2	0.004009	0.0540843	0.367	0.334	1
Dda1	0.00401884	-0.0397205	0.172	0.198	1
Rfx7	0.00403044	0.0746715	0.721	0.715	1
Ran	0.00406194	0.0483197	0.708	0.688	1
Tmem222	0.00407597	-0.0310716	0.101	0.122	1
Cops3	0.00410696	-0.0415222	0.273	0.304	1
Cbfa2t3	0.00411384	-0.049324	0.38	0.413	1
Vgll4	0.00414578	0.0609303	0.443	0.413	1
Rbis	0.00418239	-0.0462339	0.212	0.239	1
Iqgap1	0.0041884	0.0353606	0.189	0.163	1
Hdac8	0.00421994	0.0488394	0.347	0.315	1
Tet2	0.00422382	0.0661806	0.586	0.569	1
Zfp639	0.00423826	-0.0270066	0.097	0.118	1
Cfap97	0.00426945	-0.0270255	0.111	0.133	1
Smg7	0.00428507	-0.0570241	0.449	0.48	1
Hist2h2bb	0.00431865	0.0307347	0.12	0.098	1
Nsmf	0.00432081	-0.0277706	0.095	0.116	1
Stat3	0.00432227	-0.0346652	0.107	0.129	1
Ppa1	0.00433506	-0.0467322	0.284	0.314	1
Ikzf4	0.00433651	-0.048985	0.148	0.172	1
Tpx2	0.00440077	0.0563918	0.15	0.127	1
Tmem19	0.00442143	-0.0382453	0.129	0.152	1
Rraga	0.00444999	-0.0362669	0.134	0.158	1
Alg2	0.00447553	-0.0430093	0.162	0.186	1
Pafah1b2	0.0045005	-0.0388446	0.378	0.412	1
Zmynd8	0.00451211	-0.0498257	0.551	0.591	1
Rbfox2	0.00451318	-0.0469887	0.907	0.923	1
Ppil4	0.00454744	-0.0385802	0.223	0.252	1
Osbpl6	0.00455749	-0.0330141	0.107	0.129	1
Coil	0.00456129	-0.0380067	0.121	0.143	1
Coro2b	0.00456727	0.052642	0.312	0.282	1
Tspan5	0.00459903	-0.0396441	0.527	0.57	1
Src	0.00461235	-0.03518	0.16	0.185	1
Rpsa	0.00461991	0.0409067	0.965	0.96	1
Vps28	0.00462326	-0.0357813	0.173	0.2	1
Cabin1	0.00465703	-0.0404368	0.193	0.22	1
Huwe1	0.00465945	-0.0549121	0.744	0.779	1
Prmt1	0.0047241	-0.0488469	0.458	0.489	1
Pptc7	0.00475042	-0.0287341	0.086	0.106	1
Tmcc1	0.00477799	0.0580299	0.873	0.876	1
Kcnc1	0.0047872	-0.0260415	0.111	0.133	1
Snn	0.00479659	-0.033356	0.258	0.29	1
Mllt11	0.00483452	-0.0437607	0.518	0.551	1
Tmtc4	0.00490354	-0.0452643	0.25	0.279	1
Ttc3	0.0049638	-0.0382522	0.988	0.989	1
Taf7	0.00500719	0.033952	0.134	0.112	1
Dlx6	0.00503113	-0.0459647	0.34	0.37	1
E130008D07Rik	0.00503664	-0.0335843	0.11	0.131	1
Kcnmb4	0.00504065	-0.0352058	0.158	0.183	1
Aim2	0.00504334	0.048579	0.194	0.168	1
Gm7072	0.00504571	-0.0308657	0.088	0.108	1
Ctbp1	0.00505605	-0.0465079	0.319	0.348	1
Bri3bp	0.00506922	-0.0261046	0.092	0.112	1
Hdhd2	0.00510632	-0.0382425	0.132	0.155	1
Cyb5a	0.00511812	0.049298	0.26	0.233	1
Idh1	0.00514965	-0.0543859	0.336	0.366	1
Got2	0.00517115	-0.0361102	0.171	0.196	1
Ndufb3	0.00517322	-0.042619	0.28	0.309	1
Paics	0.00520469	0.0470919	0.208	0.182	1
Las1l	0.00520659	-0.0292346	0.13	0.153	1
Rab1b	0.00521089	-0.0264321	0.081	0.1	1
Ctxn1	0.00523095	-0.0333709	0.238	0.269	1
Inpp5k	0.00523609	0.0265101	0.141	0.118	1
Cnot7	0.00524632	-0.0420078	0.413	0.445	1
Cfl2	0.00527506	-0.0505727	0.432	0.465	1
Kdelr2	0.00527642	-0.0309074	0.116	0.138	1
Gosr2	0.00535729	-0.0345421	0.086	0.105	1
Ppp2r3a	0.00536031	-0.0408882	0.472	0.51	1
Grik2	0.00536331	-0.082753	0.946	0.964	1
Rps2	0.00539449	-0.0441684	0.842	0.869	1
Rrbp1	0.00539758	-0.03369	0.14	0.163	1
Arl2	0.00539769	-0.0228566	0.09	0.11	1
Polr2f	0.00542577	-0.0415498	0.244	0.273	1
Elp5	0.00542614	-0.0391567	0.159	0.183	1
Irgq	0.00550862	-0.0312656	0.098	0.118	1
Atp2a2	0.00551406	-0.0432282	0.374	0.408	1
Ubxn2b	0.00553533	-0.0371896	0.133	0.157	1
A430106G13Rik	0.00553773	0.0324733	0.142	0.119	1
mt-Co3	0.00555965	0.0452029	1	1	1
Cop1	0.00560096	-0.0385265	0.659	0.698	1
Mrpl14	0.00560679	0.0366141	0.178	0.153	1
Xpot	0.00562029	-0.0267739	0.089	0.109	1
Trim59	0.00562205	0.0364184	0.152	0.128	1
Fis1	0.0056312	-0.0392902	0.388	0.422	1
Gm26672	0.0056433	-0.0370591	0.193	0.22	1
Dhtkd1	0.00567648	-0.0337016	0.099	0.119	1
Fam117b	0.00569052	-0.0689757	0.312	0.337	1
Usp22	0.00572582	-0.0342661	0.468	0.504	1
Gpat4	0.00574902	-0.0384315	0.226	0.253	1
Aarsd1	0.00575599	-0.0337903	0.191	0.218	1
Emc4	0.00577325	-0.0289054	0.173	0.2	1
Kdm2a	0.00577633	0.0711217	0.561	0.537	1
Eif4a3	0.00579436	-0.0374626	0.151	0.174	1
Zfp46	0.00580731	-0.0274816	0.088	0.107	1
Rps27	0.00583176	-0.0456312	0.614	0.641	1
Gnl2	0.00583957	-0.033575	0.142	0.165	1
Arel1	0.00584439	-0.0399666	0.172	0.197	1
Morn4	0.00586594	-0.0254718	0.111	0.132	1
Exoc1	0.00586977	-0.0358482	0.245	0.276	1
1700030K09Rik	0.00589733	0.0317421	0.127	0.106	1
Rps12	0.00589739	-0.0488324	0.92	0.939	1
Hsf2	0.0059033	-0.0411564	0.237	0.266	1
2900060N12Rik	0.00591594	-0.0522931	0.228	0.255	1
Pxylp1	0.00594915	-0.0445228	0.164	0.188	1
Gns	0.0059696	-0.0293151	0.113	0.135	1
Taf13	0.0059731	-0.033342	0.103	0.123	1
Fmnl2	0.00598774	-0.0626601	0.739	0.763	1
Gria1	0.00599814	0.152856	0.276	0.254	1
Rpl37a	0.00600186	-0.0543573	0.756	0.786	1
Rnd3	0.00605677	0.0465388	0.468	0.438	1
Chl1	0.00611658	0.0603878	0.149	0.126	1
Slc35f1	0.00611809	-0.0517584	0.727	0.765	1
Saraf	0.00614032	-0.0304487	0.157	0.181	1
Ndufa3	0.00614431	-0.0314231	0.157	0.182	1
Slc38a2	0.00614486	-0.0408555	0.61	0.647	1
Cfl1	0.0061892	-0.0516695	0.762	0.781	1
Clasp2	0.00622028	0.0485113	0.801	0.803	1
Eloc	0.00624763	-0.0356063	0.263	0.293	1
Srsf10	0.00625288	-0.0419866	0.459	0.495	1
Ldb1	0.00627137	-0.045091	0.36	0.39	1
Hnrnpl	0.00628554	-0.0389235	0.273	0.302	1
Ascc2	0.00629836	-0.0310017	0.134	0.158	1
Tnrc18	0.00630895	0.0671248	0.775	0.775	1
Nfe2l1	0.00632039	-0.0242693	0.132	0.155	1
Akap1	0.0063387	-0.0262641	0.097	0.117	1
Dennd4a	0.00635971	-0.0477906	0.153	0.176	1
Nfat5	0.006371	-0.0436108	0.491	0.527	1
Dmd	0.00637919	0.106297	0.32	0.294	1
Pcnt	0.00641067	0.0417904	0.241	0.214	1
Oxr1	0.00643403	-0.0576279	0.166	0.189	1
Fbxo34	0.00644619	-0.0264951	0.12	0.142	1
Rnf167	0.00646425	-0.0261833	0.14	0.163	1
D330023K18Rik	0.00646891	-0.0317543	0.094	0.114	1
Zcchc14	0.00647866	-0.0420029	0.443	0.478	1
Marcksl1	0.00649375	-0.053944	0.839	0.87	1
Myo9a	0.00652279	0.0546037	0.736	0.726	1
Ubac1	0.00654301	-0.0269774	0.108	0.129	1
Tomm22	0.00657671	-0.0381785	0.257	0.288	1
Spcs3	0.00659053	-0.0266523	0.089	0.108	1
Tnrc6a	0.00659429	-0.0487882	0.669	0.711	1
Sptlc2	0.0066119	-0.0416194	0.206	0.232	1
Snrpa	0.00667208	-0.0251018	0.222	0.251	1
Psmd8	0.00667883	-0.034523	0.283	0.314	1
Lrpap1	0.00673611	-0.0379679	0.148	0.171	1
Smim14	0.00673689	-0.0579434	0.325	0.351	1
Twsg1	0.00674804	-0.0361421	0.151	0.175	1
Rnpep	0.00677181	-0.0283545	0.152	0.177	1
Ptpdc1	0.0068424	-0.0304919	0.1	0.12	1
Tecpr2	0.0068494	-0.0347983	0.112	0.133	1
Ublcp1	0.00687196	-0.0421401	0.141	0.163	1
Ube2i	0.00688128	-0.0449065	0.544	0.58	1
Tmem131	0.00688936	-0.0296094	0.41	0.449	1
Asxl3	0.00690501	-0.0824869	0.443	0.459	1
Nectin1	0.00694242	-0.0378234	0.168	0.192	1
Asna1	0.0069451	-0.025231	0.094	0.114	1
Zfand5	0.00696606	-0.0459864	0.41	0.438	1
Cox19	0.00698537	-0.0282988	0.2	0.228	1
Tox2	0.00702493	0.0560737	0.456	0.424	1
Atp13a2	0.00703207	-0.0379356	0.124	0.144	1
Vav2	0.00703563	0.0435857	0.338	0.308	1
Zfand3	0.00704309	0.0529055	0.722	0.699	1
Sox12	0.00706273	-0.0397599	0.152	0.175	1
Zfhx2	0.00708312	-0.0374389	0.365	0.398	1
Ddx3x	0.00714007	-0.0394435	0.491	0.527	1
March5	0.00716234	-0.0399197	0.316	0.347	1
Bod1	0.00718585	-0.0238275	0.171	0.197	1
Simc1	0.00719983	-0.0443966	0.184	0.209	1
E430024I08Rik	0.00720057	-0.0331349	0.111	0.131	1
Sdhb	0.00720539	-0.0409287	0.302	0.332	1
Dgcr6	0.00721034	-0.0286354	0.148	0.172	1
Zfp810	0.00724367	-0.036443	0.273	0.302	1
Phf6	0.00728719	-0.0373706	0.503	0.538	1
Evi5	0.00729175	-0.0429125	0.251	0.279	1
Tyms	0.00730458	0.0329066	0.171	0.147	1
Spock1	0.00732272	-0.0952407	0.316	0.341	1
Pbk	0.0073908	0.0320512	0.132	0.111	1
Pak3	0.00743775	0.0609275	0.562	0.535	1
Ier3ip1	0.00746578	-0.0385747	0.139	0.161	1
Rcor1	0.00747384	0.0547828	0.338	0.31	1
Ndufaf4	0.00747583	-0.0239342	0.088	0.107	1
Tmem199	0.00752601	-0.0229302	0.086	0.105	1
Jakmip2	0.00753461	-0.0372392	0.55	0.592	1
Zfp974	0.00755456	-0.0304517	0.089	0.108	1
Srpr	0.00757193	-0.0370348	0.213	0.24	1
Meis3	0.00758775	-0.0303305	0.126	0.148	1
Zfp637	0.00763751	-0.0346039	0.204	0.23	1
Zfp106	0.0076908	-0.0350622	0.285	0.316	1
E2f3	0.00772352	0.0344173	0.112	0.093	1
Kif5b	0.00772625	-0.048032	0.514	0.548	1
Rtn2	0.00773786	-0.0282564	0.137	0.16	1
Diablo	0.00774732	-0.031331	0.108	0.129	1
D830024N08Rik	0.00779427	-0.0288577	0.112	0.133	1
Eif5a	0.00782308	-0.0409659	0.441	0.475	1
Ppfia2	0.00783825	-0.042207	0.571	0.604	1
Pkia	0.00786929	-0.0430022	0.34	0.373	1
Mcts1	0.00788891	-0.0488769	0.264	0.29	1
Cacng4	0.00792834	-0.0440811	0.286	0.315	1
Ccdc91	0.00793483	-0.0295019	0.116	0.137	1
Pfdn4	0.00796402	-0.0331991	0.166	0.19	1
Bcor	0.00797657	-0.0515163	0.388	0.419	1
Filip1l	0.00797779	-0.0479813	0.193	0.217	1
Mccc1	0.0079836	0.0310401	0.115	0.096	1
Suds3	0.00799891	-0.0281628	0.169	0.194	1
Rplp0	0.00802448	-0.0455834	0.903	0.907	1
Dnajc3	0.00810615	-0.0319528	0.112	0.132	1
Ttc28	0.00811975	0.0265696	0.844	0.823	1
Tia1	0.00812521	-0.049828	0.868	0.887	1
Morc2a	0.00813574	-0.0354608	0.316	0.347	1
Srp14	0.00816673	-0.0391245	0.302	0.331	1
Ubac2	0.00819577	-0.0326179	0.308	0.339	1
Dync1i2	0.00819977	0.0524832	0.766	0.754	1
Mcl1	0.00820589	-0.0419493	0.19	0.213	1
Mtch2	0.00821157	-0.0417084	0.23	0.256	1
Gtf3c1	0.00821293	-0.0347568	0.284	0.313	1
Xpnpep3	0.00822271	-0.0330925	0.121	0.142	1
Wnt7a	0.0082341	-0.0397319	0.209	0.234	1
Arhgap33	0.00827156	-0.0282857	0.237	0.266	1
Dot1l	0.00828661	-0.0338254	0.298	0.328	1
Mark3	0.00831095	-0.0297475	0.461	0.497	1
Vwa8	0.00832844	-0.0270073	0.103	0.123	1
Prelid1	0.00833435	-0.0348887	0.179	0.204	1
Dnajc15	0.00834367	-0.0318699	0.146	0.169	1
Uqcrq	0.00839136	-0.0392063	0.293	0.321	1
Kcmf1	0.00840235	-0.0485664	0.31	0.336	1
Pgm2	0.00840754	0.0486077	0.235	0.21	1
Psmf1	0.00841884	-0.0292345	0.128	0.15	1
Wrn	0.00844742	0.0295087	0.116	0.096	1
CAAA01118383.1	0.00846862	-0.0324036	0.109	0.129	1
Mfap3	0.00854829	-0.0367329	0.263	0.291	1
Rapgef2	0.00856187	-0.0403481	0.489	0.519	1
Zfp141	0.00858025	0.0314395	0.169	0.146	1
Smim13	0.00866715	-0.0309231	0.087	0.106	1
Exosc4	0.00868597	-0.0277428	0.108	0.128	1
Gabbr1	0.00869705	-0.0343252	0.331	0.362	1
Lamp1	0.00871063	-0.0385457	0.22	0.246	1
Ddah2	0.00872066	-0.031237	0.377	0.413	1
Acrbp	0.00881424	0.0303313	0.107	0.088	1
Trim44	0.00881729	-0.041291	0.44	0.472	1
Zswim8	0.00884493	-0.0369211	0.214	0.24	1
Dnajb4	0.00887599	-0.0322012	0.12	0.141	1
Wdr76	0.00888594	0.0321768	0.167	0.144	1
Cds2	0.00890537	-0.0302702	0.153	0.176	1
Nedd4l	0.00893803	0.0437221	0.959	0.961	1
Gm49336	0.00894363	-0.0385531	0.224	0.25	1
Trp53i11	0.00897624	-0.0395086	0.281	0.309	1
Lamtor2	0.00897931	-0.0408089	0.173	0.196	1
Commd8	0.00898005	-0.0257256	0.089	0.107	1
Lsm14b	0.00899288	-0.0346014	0.19	0.215	1
Cebpz	0.00900389	-0.036383	0.193	0.219	1
Pex3	0.00901868	-0.0270147	0.118	0.139	1
Mrpl54	0.00903255	-0.0336128	0.111	0.131	1
Nmt1	0.00907518	-0.0299933	0.175	0.2	1
Rragc	0.00916173	-0.0289388	0.121	0.142	1
Rsu1	0.00916799	0.0376049	0.123	0.103	1
Vps29	0.00920451	-0.034641	0.192	0.217	1
Neurl4	0.0092189	-0.0316883	0.107	0.127	1
Arnt	0.00924281	0.0468419	0.302	0.275	1
Rpl23	0.00930722	-0.0513359	0.898	0.913	1
Fbxo21	0.00932923	-0.0257699	0.235	0.265	1
0610010F05Rik	0.00934854	-0.0444956	0.468	0.499	1
Arhgap32	0.00938606	-0.0331079	0.423	0.457	1
Vps13d	0.00941503	-0.030448	0.311	0.343	1
Ciapin1	0.00946311	-0.0239813	0.103	0.122	1
Snx10	0.00946812	-0.0305957	0.097	0.116	1
Fkbp8	0.00951263	-0.0385837	0.237	0.264	1
mt-Atp8	0.00953801	-0.0359549	0.302	0.332	1
Far1	0.00956008	-0.0476466	0.298	0.322	1
Ssr2	0.00956834	-0.03253	0.275	0.303	1
Trim35	0.00957561	-0.0327802	0.539	0.573	1
Hspa13	0.00963734	-0.0238963	0.126	0.148	1
Fbxl2	0.0096381	-0.0323031	0.136	0.158	1
Ndufa2	0.00971067	-0.0370595	0.293	0.325	1
mt-Nd4l	0.00972526	-0.0399133	0.52	0.557	1
Ppm1g	0.00973806	-0.0281944	0.17	0.194	1
Gm6994	0.00980562	0.0297528	0.194	0.169	1
Rbm27	0.00989331	-0.0402006	0.317	0.345	1
Ctnnbl1	0.0100113	-0.0331102	0.299	0.329	1
Hspa5	0.01007	-0.0363044	0.317	0.346	1
Wasf2	0.0101321	0.04035	0.202	0.178	1
Mrpl22	0.0101331	-0.0240009	0.091	0.11	1
C1qbp	0.0101403	-0.0302831	0.144	0.166	1
1500011B03Rik	0.0101641	-0.0306399	0.17	0.194	1
Cdc37	0.0102034	-0.0373249	0.216	0.241	1
Tpp2	0.0102076	-0.0364616	0.284	0.313	1
Amy1	0.0102344	-0.0439705	0.163	0.186	1
Iws1	0.0102664	-0.0335784	0.323	0.354	1
Nck1	0.0102755	-0.0331968	0.244	0.272	1
Ppid	0.0102777	-0.0277924	0.179	0.204	1
Sh3bgrl	0.0103047	-0.0481689	0.473	0.507	1
Edrf1	0.0103461	-0.0292091	0.15	0.173	1
Nol12	0.0103724	-0.030819	0.086	0.104	1
Jund	0.0103914	-0.0286448	0.231	0.258	1
Rps26	0.0104439	-0.0500106	0.779	0.794	1
Spidr	0.0105109	0.0339429	0.124	0.105	1
Cdc37l1	0.0105199	-0.0397702	0.44	0.471	1
Plekhg2	0.0105703	0.0347255	0.12	0.101	1
Zfp799	0.010609	-0.0306494	0.192	0.217	1
Pds5b	0.0106322	-0.0351396	0.545	0.574	1
Id2	0.0106458	-0.0493673	0.145	0.166	1
Rpl6	0.0106714	0.0420204	0.925	0.908	1
Exoc3	0.0106742	-0.0304667	0.418	0.451	1
Ptpa	0.0107211	-0.0287961	0.156	0.179	1
Extl3	0.0107423	-0.0270216	0.099	0.118	1
Ctbp2	0.0107501	-0.0317892	0.137	0.159	1
Hsd17b4	0.0107699	-0.0351123	0.131	0.152	1
Lrpprc	0.0108114	-0.0422247	0.196	0.219	1
Clic1	0.0108319	0.0360134	0.164	0.142	1
Hira	0.0108419	-0.0436139	0.329	0.357	1
Tmem106b	0.0108595	-0.0297877	0.14	0.162	1
Creb1	0.010922	0.0627389	0.632	0.613	1
Ankib1	0.0109973	-0.0428257	0.4	0.428	1
Ergic2	0.0110297	-0.0347638	0.338	0.368	1
Plxna4os3	0.01111	-0.0303927	0.105	0.124	1
Crtc3	0.011111	-0.0318512	0.168	0.191	1
Dclk2	0.0111173	-0.0473317	0.989	0.981	1
Ccnb1	0.0111549	0.0275758	0.127	0.107	1
Usp5	0.01116	-0.024307	0.116	0.136	1
Nsd1	0.0111913	0.0521746	0.781	0.774	1
Ddx24	0.0112479	-0.0359265	0.299	0.329	1
Ddost	0.0113928	-0.0266619	0.124	0.145	1
Zfp384	0.0113946	-0.0245387	0.122	0.143	1
Dzip3	0.0114173	-0.0415801	0.479	0.513	1
Cebpg	0.01144	-0.0465146	0.163	0.185	1
Usp50	0.0114621	-0.0385369	0.127	0.147	1
Map3k4	0.0114717	-0.0264979	0.18	0.205	1
Kpna1	0.0114733	-0.0298527	0.194	0.219	1
Stau2	0.0115354	-0.0355678	0.517	0.553	1
Phax	0.0115387	-0.0238974	0.241	0.269	1
Gatad1	0.0115458	-0.0341201	0.148	0.17	1
Maz	0.0115695	-0.0262677	0.199	0.225	1
Ints13	0.0115739	-0.0255822	0.127	0.149	1
Ap1b1	0.0115816	-0.028617	0.121	0.141	1
Ube2s	0.0116405	0.0632931	0.634	0.627	1
Brd3	0.0116413	-0.0349142	0.489	0.521	1
4732471J01Rik	0.0116817	-0.0208919	0.094	0.113	1
Ppp2r2d	0.0117241	-0.0298971	0.237	0.264	1
Csrp2	0.0117362	0.0354501	0.185	0.162	1
Aptx	0.0117822	-0.0235617	0.108	0.128	1
Zswim6	0.0118144	0.0468419	0.837	0.841	1
Retreg2	0.0118572	-0.0254596	0.119	0.139	1
Prag1	0.0118821	-0.0296968	0.096	0.115	1
Trir	0.011987	-0.0302863	0.369	0.402	1
Xkr4	0.0120226	0.00799563	0.631	0.594	1
Rdx	0.0120726	0.0541098	0.692	0.681	1
Ccdc28b	0.0121126	-0.0278709	0.126	0.147	1
Abhd6	0.0121623	-0.0335726	0.123	0.143	1
Phlpp1	0.0121726	-0.0450038	0.419	0.449	1
Pou6f1	0.0122035	-0.0480742	0.42	0.449	1
Efr3b	0.0122836	-0.0373161	0.233	0.259	1
Acd	0.0123629	-0.022813	0.085	0.103	1
Pom121	0.0123673	-0.0339719	0.177	0.201	1
Ncs1	0.0124109	-0.0271712	0.143	0.165	1
Rfwd3	0.0125358	0.0331723	0.142	0.122	1
Bcl9l	0.0125886	-0.0307678	0.118	0.138	1
Cul1	0.0125901	-0.0512922	0.387	0.413	1
Brd8	0.0126135	-0.0390591	0.427	0.456	1
Trappc2l	0.012614	-0.0285049	0.144	0.165	1
Rpl7l1	0.0127388	-0.0263413	0.169	0.192	1
Dhx30	0.0127536	-0.0387727	0.478	0.51	1
Uqcrb	0.0127645	-0.0437105	0.275	0.3	1
Higd1a	0.0127661	-0.0290967	0.101	0.12	1
Socs5	0.0127732	-0.0352688	0.116	0.135	1
Wtap	0.0128014	-0.043645	0.311	0.338	1
Rnf7	0.0128016	-0.035593	0.232	0.257	1
Nup98	0.0128024	-0.0371042	0.383	0.412	1
Brd9	0.0128851	-0.0339905	0.274	0.3	1
Incenp	0.0128954	0.02836	0.112	0.094	1
Adcy9	0.0129396	-0.0403246	0.134	0.155	1
Ube2a	0.0129448	-0.0301639	0.132	0.152	1
Atp6v1b2	0.0129586	-0.038938	0.305	0.331	1
Fer	0.0130104	-0.0414825	0.394	0.426	1
Prrc2b	0.0130381	-0.045866	0.64	0.662	1
Klf13	0.0130552	0.0371551	0.175	0.154	1
Ascc3	0.0131046	-0.0353775	0.477	0.513	1
Usp47	0.0131793	-0.0322788	0.551	0.591	1
Cramp1l	0.0132585	0.0363246	0.277	0.251	1
Nbeal1	0.0133	-0.0299532	0.386	0.418	1
Psmg2	0.0133363	-0.0257711	0.106	0.125	1
Setd3	0.0133387	-0.0388608	0.253	0.278	1
Pdik1l	0.0133465	-0.0318923	0.137	0.158	1
Mindy3	0.0133753	-0.0456018	0.202	0.224	1
Fbxl4	0.0134123	-0.0230863	0.088	0.106	1
Cacfd1	0.01345	-0.0262078	0.192	0.217	1
Fnbp1l	0.0134647	-0.0471538	0.88	0.905	1
Gfm1	0.0135453	-0.0237768	0.101	0.119	1
Luc7l	0.0135582	-0.0342614	0.387	0.417	1
Gramd4	0.0136664	-0.0363325	0.193	0.216	1
Myl12b	0.0136696	-0.0317505	0.29	0.319	1
Arpc5	0.0137146	-0.0349049	0.316	0.344	1
Ank2	0.0137475	0.0402681	0.853	0.831	1
Mbtd1	0.0137923	0.0515676	0.761	0.753	1
Rimklb	0.0138298	-0.04036	0.37	0.397	1
Ywhab	0.0138483	-0.0336159	0.403	0.435	1
Clock	0.0138605	-0.0234961	0.312	0.343	1
Farsa	0.0139063	-0.0252893	0.126	0.146	1
Ube2e1	0.0139145	-0.0406249	0.268	0.293	1
Rnpc3	0.0139454	-0.0366406	0.223	0.248	1
Atxn10	0.0139724	-0.036633	0.579	0.616	1
Zfp711	0.0139998	-0.0392029	0.244	0.269	1
Satb1	0.0140245	-0.0480545	0.492	0.521	1
[truncated: 4,596 more rows]
