# Supplementary material for: Loss of Ezh2 in the medial ganglionic eminence alters interneuron fate, cell morphology and gene expression profiles
Source: Front Cell Neurosci. 2024 Feb 14;18:1334244. doi: 10.3389/fncel.2024.1334244 (PMC10899338; doi:10.3389/fncel.2024.1334244)
Supplement: Supplementary file 8 [file Table_6.xlsx]

## Sheet: multiome_seq_depth
Sample	Estimated_number_of_cells	Sequenced_read_pairs_RNA	Median_UMI_counts_per_cell_RNA	Median_genes_per_cell_RNA	Sequenced_read_pairs_ATAC	Median_fragments_per_cell_ATAC
E12.5 WT	7325	290467383	8252	3281	242612118	14465
E12.5 Het	7578	198128926	6006	2693	297531741	16794
E12.5 KO	9989	312370352	6645	2844	210811269	10010
E15.5 WT	14407	307184096	5097	2417	281350803	7808
E15.5 Het	12655	287063994	5088	2401	269896091	8091
E15.5 KO	11432	292396315	5600	2583	246014072	8700
